# Supplementary material
Source: publisher figshare collection journal article supplement (https://gsajournals.figshare.com/articles/dataset/_/8233055)
Supplement: Supplementary file 1 [file 1]

## Sheet: Summary
	>= 50 % Baceria
Potential contamination	scaf_id	Length [bp]	1kb fragments	1kb fragm. listed	Viridiplantae	Viridiplantae %	Opisthokonta	Opisthokonta %	Bacteria	Bacteria %	Not_assigned	Not_assigned %	No_hits	No_hits %	Other	Other %	blastr_NO_read_map	PBJelly_not_mapped	Gene models	CHH	CHG	CpG	meth per 10kb	H3	H3K4	H3K27	H3 per 10kb
putative contamination	Scaffold_2406	1685	2	1	0	0	0	0	1	0.5	1	0.5	0	0	0	0	x	x		0	0	0	0	390	200	226	1950
putative contamination	Scaffold_2454	1502	2	1	0	0	0	0	1	0.5	1	0.5	0	0	0	0				0	0	0	0	761	282	332	3805
methylated region; <100 bp bacterial hit	Scaffold_2579	1459	2	1	0	0	0	0	1	0.5	1	0.5	0	0	0	0				1	1	2	20	1603	835	1109	8015
putative contamination	Scaffold_2594	1459	2	1	0	0	0	0	1	0.5	0	0	1	0.5	0	0	x			0	0	0	0	1369	702	875	6845
Viridiplantae; <100 bp bacterial hit	Scaffold_2640	1400	2	1	1	0.5	0	0	1	0.5	0	0	0	0	0	0	x	x		0	0	0	0	204	208	484	1020
methylated region; <100 bp bacterial hit	Scaffold_2960	1117	2	1	0	0	0	0	1	0.5	0	0	1	0.5	0	0	x			1	1	4	30	1501	709	951	7505

## Sheet: data_table
3166	196005095	197702	0.980898	99765	0.504623	8023	0.0405813	811	0.00410213	37305	0.188693	45669	0.230999	6129	0.0310012		SUM	44046			MEDIAN	15			MEDIAN	8617.5
scaf_id	Length [bp]	1kb fragments	1kb fragm. listed	Viridiplantae	Viridiplantae %	Opisthokonta	Opisthokonta %	Bacteria	Bacteria %	Not_assigned	Not_assigned %	No_hits	No_hits %	Other	Other %	blastr_NO_read_map	PBJelly_not_mapped	Gene models	CHH	CHG	CpG	meth per 10kb	H3	H3K4	H3K27	H3 per 10kb
Scaffold_53	6518629	6519	0.964719	4893	0.750575	247	0.0378892	19	0.00291456	863	0.132382	267	0.0409572	230	0.0352815			1436	346	789	6630	11.9113	4810526	9790020	4018538	7379.24
Scaffold_32	4427751	4428	0.97019	3627	0.819106	112	0.0252936	13	0.00293586	423	0.0955285	121	0.0273261	132	0.0298103			1240	309	600	5523	14.5257	3596585	8372759	2788044	8122.37
Scaffold_31	4372925	4373	0.964327	3152	0.720787	179	0.040933	15	0.00343014	654	0.149554	217	0.0496227	156	0.0356735			896	690	925	4585	14.1779	3121360	6245428	2625937	7137.8
Scaffold_39	3952838	3953	0.966355	2761	0.698457	186	0.0470529	22	0.00556539	674	0.170503	177	0.0447761	133	0.0336453			818	477	616	3986	12.8485	2803711	5559440	2327999	7092.62
Scaffold_61	3878604	3879	0.960041	2568	0.662026	205	0.0528487	18	0.00464037	669	0.172467	264	0.0680588	155	0.0399588			690	425	633	3887	12.7481	2599479	4732453	2180342	6701.42
Scaffold_40	3750053	3751	0.956545	2508	0.668622	182	0.0485204	21	0.00559851	661	0.17622	216	0.0575846	163	0.0434551			678	678	720	4573	15.9184	2533302	4404738	2261160	6753.67
Scaffold_26	3706790	3707	0.961964	2870	0.774211	129	0.034799	16	0.00431616	435	0.117346	116	0.0312921	141	0.0380361			833	214	300	4269	12.9026	2754222	5718564	2341695	7429.79
Scaffold_54	3007629	3008	0.959109	1705	0.566822	183	0.0608378	15	0.0049867	662	0.22008	320	0.106383	123	0.040891			435	566	766	2766	13.6237	1971340	2815915	1641777	6553.66
Scaffold_44	2857539	2858	0.96606	2172	0.759972	126	0.0440868	8	0.00279916	351	0.122813	104	0.0363891	97	0.0339398			732	173	445	3249	13.5304	2086567	4726702	1821113	7300.79
Scaffold_65	2731988	2732	0.950586	1705	0.624085	173	0.0633236	20	0.00732064	526	0.192533	173	0.0633236	135	0.0494143			374	900	1387	3163	19.9488	1725340	2394293	1516231	6315.3
Scaffold_57	2703717	2704	0.95747	1874	0.693047	118	0.0436391	9	0.0033284	425	0.157175	163	0.0602811	115	0.0425296			523	254	417	2520	11.801	1744641	3088151	1680406	6452.07
Scaffold_87	2655355	2656	0.95369	1636	0.615964	137	0.0515813	22	0.00828313	522	0.196536	216	0.0813253	123	0.0463102			405	453	650	3013	15.497	1693484	2547701	1395377	6376.07
Scaffold_102	2548286	2549	0.942723	1500	0.588466	154	0.0604158	16	0.00627697	518	0.203217	215	0.0843468	146	0.0572774				363	436	2478	12.856	1557392	2250626	1334124	6109.82
Scaffold_21	2539303	2540	0.956693	1930	0.759843	97	0.038189	10	0.00393701	308	0.12126	85	0.0334646	110	0.0433071			572	136	255	2453	11.1969	1791757	3969740	1637067	7054.16
Scaffold_19	2358613	2359	0.968207	1765	0.748198	98	0.041543	6	0.00254345	339	0.143705	76	0.032217	75	0.0317931			489	72	169	2743	12.6494	1634727	3276514	1455168	6929.75
Scaffold_30	2329615	2330	0.951502	1544	0.662661	125	0.0536481	15	0.00643777	406	0.174249	127	0.0545064	113	0.0484979			381	179	259	2212	11.3734	1426338	2425626	1434668	6121.62
Scaffold_93	2093368	2094	0.9532	1207	0.576409	114	0.0544413	8	0.00382044	444	0.212034	223	0.106495	98	0.0468004			291	397	470	2242	14.8472	1258749	1981232	1073119	6011.22
Scaffold_33	2002645	2003	0.951073	1311	0.654518	92	0.0459311	11	0.00549176	369	0.184224	122	0.0609086	98	0.0489266			354	319	489	2698	17.5037	1311084	2370140	1204717	6545.6
Scaffold_10	1944274	1945	0.977892	1591	0.817995	59	0.0303342	3	0.00154242	183	0.0940874	66	0.0339332	43	0.022108				108	67	2314	12.7969	1533996	3401444	1216270	7886.87
Scaffold_60	1875991	1876	0.962687	1074	0.572495	113	0.0602345	17	0.00906183	408	0.217484	194	0.103412	70	0.0373134			291	418	460	1711	13.8006	1248696	1883343	951368	6656.16
Scaffold_8	1856458	1857	0.972536	1408	0.758212	71	0.0382337	8	0.00430802	266	0.143242	53	0.0285407	51	0.0274637			367	121	410	2276	15.1158	1364116	2800708	1231168	7345.81
Scaffold_29	1718329	1719	0.964514	1174	0.682955	82	0.0477022	12	0.0069808	305	0.177429	85	0.0494474	61	0.0354857			337	93	298	1683	12.0652	1267034	2501652	1025840	7370.76
Scaffold_6	1708715	1709	0.953189	1131	0.661791	88	0.0514921	7	0.00409596	327	0.19134	76	0.0444705	80	0.046811			349	237	325	2125	15.7226	1177565	2088146	1023775	6890.37
Scaffold_5	1608692	1609	0.962088	1158	0.719702	83	0.0515848	13	0.00807955	243	0.151025	51	0.0316967	61	0.0379117			330	201	585	2003	17.3337	1075854	1929990	891136	6686.48
Scaffold_4	1572669	1573	0.928163	1139	0.724094	71	0.0451367	5	0.00317864	190	0.120788	55	0.034965	113	0.0718373			339	108	294	1809	14.0559	1074624	2433365	907490	6831.68
Scaffold_123	1501755	1502	0.956059	758	0.50466	76	0.0505992	3	0.00199734	379	0.25233	220	0.146471	66	0.0439414			179	429	703	1426	17.0306	987225	1162715	826883	6572.74
Scaffold_46	1427442	1428	0.94958	875	0.612745	74	0.0518207	7	0.00490196	283	0.198179	117	0.0819328	72	0.0504202			219	283	398	1426	14.7549	890532	1392362	664581	6236.22
Scaffold_18	1400249	1401	0.96217	928	0.662384	89	0.0635261	7	0.00499643	235	0.167737	89	0.0635261	53	0.0378301			245	257	390	1583	15.9172	974570	1723674	770299	6956.25
Scaffold_3	1302841	1303	0.972371	995	0.763622	47	0.0360706	4	0.00306984	170	0.130468	51	0.0391404	36	0.0276285			328	406	727	1602	20.99	995941	2124752	773084	7643.45
Scaffold_12	1289709	1290	0.965116	855	0.662791	75	0.0581395	8	0.00620155	230	0.178295	77	0.0596899	45	0.0348837			225	132	264	1737	16.5349	880910	1409191	792939	6828.76
Scaffold_15	1254565	1255	0.969721	962	0.766534	48	0.038247	5	0.00398406	158	0.125896	44	0.0350598	38	0.0302789			326	74	114	1645	14.6056	887679	1861062	748210	7073.14
Scaffold_2	1123237	1124	0.977758	894	0.795374	32	0.0284698	3	0.00266904	140	0.124555	30	0.0266904	25	0.022242			281	74	130	1609	16.1299	818122	1610761	638058	7278.67
Scaffold_118	1016257	1017	0.969518	401	0.394297	50	0.0491642	4	0.00393314	250	0.245821	281	0.276303	31	0.0304818			76	409	679	803	18.5939	803109	661190	577726	7896.84
Scaffold_22	968852	969	0.96388	479	0.494324	61	0.0629515	8	0.00825593	265	0.273478	121	0.124871	35	0.0361197			116	485	616	752	19.1228	623389	620831	468710	6433.32
Scaffold_96	960822	961	0.947971	682	0.709677	54	0.0561915	2	0.00208117	136	0.141519	37	0.0385016	50	0.0520291			171	150	391	1226	18.3871	617795	1068100	536532	6428.67
Scaffold_37	955024	956	0.964435	562	0.587866	44	0.0460251	6	0.00627615	175	0.183054	135	0.141213	34	0.0355649			199	238	562	956	18.3682	717285	1158159	649612	7502.98
Scaffold_1	888910	889	0.950506	611	0.687289	45	0.0506187	3	0.00337458	143	0.160855	43	0.048369	44	0.0494938				110	149	1061	14.8481	650288	1197292	585700	7314.83
Scaffold_131	884052	885	0.975141	385	0.435028	40	0.0451977	5	0.00564972	218	0.246328	215	0.242938	22	0.0248588			74	448	441	687	17.8079	730272	629165	518673	8251.66
Scaffold_17	871864	872	0.954128	517	0.59289	51	0.0584862	5	0.00573394	193	0.22133	66	0.0756881	40	0.0458716			146	59	225	778	12.1789	566227	975241	550170	6493.43
Scaffold_38	862517	863	0.961761	469	0.543453	51	0.0590962	7	0.00811124	210	0.243337	93	0.107764	33	0.0382387			116	195	263	786	14.4148	570635	861746	518942	6612.22
Scaffold_16	851675	852	0.960094	587	0.688967	43	0.0504695	3	0.00352113	137	0.160798	48	0.056338	34	0.0399061			138	221	279	1317	21.3263	616213	960502	584803	7232.55
Scaffold_7	836364	837	0.966547	572	0.683393	37	0.0442055	2	0.00238949	150	0.179211	48	0.0573477	28	0.0334528			152	119	224	1189	18.3035	620727	994650	546809	7416.09
Scaffold_9	803787	804	0.977612	612	0.761194	37	0.0460199	5	0.00621891	120	0.149254	12	0.0149254	18	0.0223881			206	91	368	943	17.4378	630721	1405626	495076	7844.79
Scaffold_11	745508	746	0.965147	483	0.647453	48	0.0643432	1	0.00134048	162	0.217158	26	0.0348525	26	0.0348525				70	70	746	11.8767	488667	865835	421715	6550.5
Scaffold_25	745910	746	0.965147	546	0.731903	36	0.0482574	2	0.00268097	96	0.128686	40	0.0536193	26	0.0348525			171	77	187	811	14.4102	536433	1125054	458286	7190.79
Scaffold_13	719485	720	0.965278	512	0.711111	30	0.0416667	0	0	123	0.170833	30	0.0416667	25	0.0347222			149	206	136	947	17.9028	515236	1009330	471162	7156.06
Scaffold_90	700260	701	0.974322	330	0.470756	35	0.0499287	4	0.00570613	157	0.223966	157	0.223966	18	0.0256776			80	240	396	508	16.3195	545550	481074	376655	7782.45
Scaffold_23	689025	690	0.953623	382	0.553623	39	0.0565217	5	0.00724638	153	0.221739	79	0.114493	32	0.0463768			105	162	317	646	16.3043	480637	610043	366766	6965.75
Scaffold_52	630292	631	0.96038	283	0.448494	39	0.0618067	1	0.00158479	144	0.228209	139	0.220285	25	0.0396197			66	261	228	439	14.7068	410763	458613	292878	6509.71
Scaffold_14	619847	620	0.946774	435	0.701613	30	0.0483871	2	0.00322581	85	0.137097	35	0.0564516	33	0.0532258			104	366	193	688	20.1129	439639	776618	411953	7090.95
Scaffold_42	604133	605	0.966942	277	0.457851	36	0.0595041	2	0.00330579	149	0.246281	121	0.2	20	0.0330579			59	184	224	380	13.0248	450742	394986	316196	7450.28
Scaffold_168	598070	599	0.978297	235	0.392321	27	0.0450751	1	0.00166945	114	0.190317	209	0.348915	13	0.0217028			45	212	286	372	14.5242	421175	339624	269538	7031.3
Scaffold_134	587309	588	0.972789	228	0.387755	22	0.037415	7	0.0119048	161	0.27381	154	0.261905	16	0.0272109			47	187	279	343	13.7585	508371	360281	381679	8645.77
Scaffold_56	573942	574	0.958188	315	0.54878	26	0.0452962	1	0.00174216	142	0.247387	66	0.114983	24	0.0418118			92	193	251	452	15.6098	425162	596208	347831	7407
Scaffold_75	572238	573	0.970332	251	0.438045	22	0.0383944	6	0.0104712	124	0.216405	153	0.267016	17	0.0296684			49	194	188	414	13.8918	402671	406348	284741	7027.42
Scaffold_20	564741	565	0.962832	435	0.769912	8	0.0141593	3	0.00530973	70	0.123894	28	0.0495575	21	0.0371681			134	28	30	872	16.4602	420393	861542	342460	7440.58
Scaffold_51	552757	553	0.949367	217	0.392405	30	0.0542495	4	0.00723327	133	0.240506	141	0.254973	28	0.0506329			36	195	148	321	12.0072	302593	200669	256374	5471.84
Scaffold_34	539119	540	0.97037	220	0.407407	23	0.0425926	3	0.00555556	120	0.222222	158	0.292593	16	0.0296296			57	281	512	495	23.8519	362458	292020	317441	6712.19
Scaffold_50	538036	539	0.966605	278	0.51577	19	0.0352505	5	0.00927644	125	0.231911	94	0.174397	18	0.0333952			64	185	83	602	16.141	352133	349931	254286	6533.08
Scaffold_24	537583	538	0.962825	304	0.565056	34	0.063197	3	0.00557621	112	0.208178	65	0.120818	20	0.0371747			75	92	263	460	15.1487	361346	426833	315145	6716.47
Scaffold_69	531325	532	0.964286	254	0.477444	37	0.0695489	3	0.0056391	118	0.221805	101	0.18985	19	0.0357143			52	247	221	390	16.1278	365601	352172	259551	6872.2
Scaffold_78	518561	519	0.947977	221	0.425819	22	0.0423892	0	0	140	0.26975	109	0.210019	27	0.0520231			48	117	239	441	15.3565	399048	457000	315794	7688.79
Scaffold_28	495605	496	0.96371	228	0.459677	25	0.0504032	2	0.00403226	124	0.25	99	0.199597	18	0.0362903			40	332	390	519	25.0202	393852	324289	279592	7940.56
Scaffold_62	472139	473	0.97463	238	0.503171	29	0.0613108	3	0.00634249	114	0.241015	77	0.162791	12	0.02537			84	190	272	468	19.6617	345785	445291	254309	7310.47
Scaffold_68	468572	469	0.957356	193	0.411514	18	0.0383795	0	0	121	0.257996	117	0.249467	20	0.0426439			53	216	247	354	17.42	389040	312370	288244	8295.1
Scaffold_27	464375	465	0.980645	392	0.843011	8	0.0172043	3	0.00645161	47	0.101075	6	0.0129032	9	0.0193548			221	16	157	484	14.129	397665	853697	298216	8551.94
Scaffold_49	455545	456	0.967105	242	0.530702	22	0.0482456	3	0.00657895	89	0.195175	85	0.186404	15	0.0328947			55	139	234	428	17.5658	293064	293400	241126	6426.84
Scaffold_55	455084	456	0.958333	254	0.557018	24	0.0526316	2	0.00438596	108	0.236842	49	0.107456	19	0.0416667			75	104	150	409	14.5395	310481	497801	315498	6808.79
Scaffold_70	454322	455	0.969231	193	0.424176	17	0.0373626	2	0.0043956	117	0.257143	112	0.246154	14	0.0307692			37	166	128	434	16	291305	256786	235713	6402.31
Scaffold_48	453278	454	0.955947	214	0.471366	26	0.0572687	5	0.0110132	105	0.231278	84	0.185022	20	0.0440529			45	143	225	415	17.2467	280299	325478	237608	6173.99
Scaffold_81	446465	447	0.948546	287	0.642058	16	0.0357942	1	0.00223714	89	0.199105	31	0.0693512	23	0.0514541			69	87	239	483	18.0984	309806	490676	267252	6930.78
Scaffold_41	445253	446	0.96861	248	0.556054	31	0.0695067	2	0.0044843	96	0.215247	55	0.123318	14	0.0313901			63	107	171	422	15.6951	312898	466271	216580	7015.65
Scaffold_36	435980	436	0.972477	256	0.587156	23	0.0527523	2	0.00458716	82	0.188073	61	0.139908	12	0.0275229			63	165	383	414	22.0642	330303	432455	242686	7575.76
Scaffold_59	421643	422	0.973934	189	0.447867	22	0.0521327	2	0.00473934	95	0.225118	103	0.244076	11	0.0260664			31	246	138	305	16.327	221494	182124	149882	5248.67
Scaffold_35	412684	413	0.949153	245	0.59322	24	0.0581114	4	0.00968523	86	0.208232	33	0.0799031	21	0.0508475			80	83	139	373	14.4068	270105	479636	228839	6540.07
Scaffold_63	410412	411	0.958637	238	0.579075	21	0.0510949	3	0.00729927	86	0.209246	46	0.111922	17	0.0413625			58	125	218	409	18.2968	257485	395803	205696	6264.84
Scaffold_74	402841	403	0.967742	200	0.496278	25	0.0620347	0	0	121	0.300248	44	0.109181	13	0.0322581			33	84	138	398	15.3846	259269	258478	196510	6433.47
Scaffold_47	394668	395	0.972152	206	0.521519	18	0.0455696	0	0	93	0.235443	67	0.16962	11	0.0278481			44	100	182	268	13.9241	354458	381163	291969	8973.62
Scaffold_43	390796	391	0.959079	298	0.762148	11	0.028133	0	0	55	0.140665	11	0.028133	16	0.0409207			125	4	206	298	12.9923	292421	629288	265904	7478.8
Scaffold_94	387512	388	0.981959	137	0.353093	11	0.0283505	0	0	79	0.203608	154	0.396907	7	0.0180412			19	211	254	348	20.9536	349275	254066	223002	9001.93
Scaffold_394	382839	383	0.963446	121	0.315927	16	0.0417755	1	0.00261097	81	0.211488	150	0.391645	14	0.0365535			14	131	189	177	12.9765	278411	174726	188622	7269.22
Scaffold_112	373687	374	0.959893	135	0.360963	19	0.0508021	1	0.0026738	98	0.262032	106	0.283422	15	0.040107				77	98	323	13.3155	318791	259113	221340	8523.82
Scaffold_79	373297	374	0.949198	181	0.483957	23	0.0614973	3	0.00802139	85	0.227273	63	0.168449	19	0.0508021			50	79	167	210	12.1925	210657	295939	187655	5632.54
Scaffold_45	363709	364	0.961538	204	0.56044	13	0.0357143	2	0.00549451	94	0.258242	37	0.101648	14	0.0384615			39	123	191	490	22.0879	246623	326920	197528	6775.36
Scaffold_113	341079	342	0.964912	126	0.368421	17	0.0497076	1	0.00292398	72	0.210526	114	0.333333	12	0.0350877				104	186	223	15	301220	219949	202941	8807.6
Scaffold_124	339424	340	0.970588	128	0.376471	17	0.05	0	0	81	0.238235	104	0.305882	10	0.0294118			22	139	205	283	18.4412	211774	162243	152276	6228.65
Scaffold_106	338600	339	0.946903	125	0.368732	10	0.0294985	1	0.00294985	80	0.235988	105	0.309735	18	0.0530973				156	213	261	18.5841	292740	190347	198354	8635.4
Scaffold_109	334727	335	0.967164	128	0.38209	23	0.0686567	1	0.00298507	86	0.256716	86	0.256716	11	0.0328358				195	312	326	24.8657	292823	226404	229527	8740.99
Scaffold_111	326297	327	0.981651	127	0.388379	14	0.0428135	0	0	73	0.223242	107	0.327217	6	0.0183486				99	222	197	15.841	248782	163887	185735	7608.01
Scaffold_76	325510	326	0.947853	142	0.435583	5	0.0153374	2	0.00613497	83	0.254601	77	0.236196	17	0.0521472			27	117	130	175	12.9448	224126	200739	154459	6875.03
Scaffold_82	325510	326	0.97546	132	0.404908	11	0.0337423	2	0.00613497	76	0.233129	97	0.297546	8	0.0245399			25	179	162	234	17.638	287716	166841	198857	8825.64
Scaffold_71	324405	325	0.953846	133	0.409231	19	0.0584615	2	0.00615385	96	0.295385	60	0.184615	15	0.0461538			24	152	139	237	16.2462	222658	195917	153706	6851.02
Scaffold_58	322210	323	0.972136	156	0.482972	17	0.0526316	4	0.0123839	68	0.210526	69	0.213622	9	0.0278638			35	120	121	277	16.0372	268768	243790	191019	8320.99
Scaffold_67	311041	312	0.935897	142	0.455128	17	0.0544872	0	0	86	0.275641	47	0.150641	20	0.0641026			38	85	115	258	14.6795	295383	294453	257755	9467.4
Scaffold_80	309383	310	0.980645	112	0.36129	15	0.0483871	1	0.00322581	92	0.296774	84	0.270968	6	0.0193548			21	106	18	261	12.4194	245990	196489	159814	7935.16
Scaffold_137	299263	300	0.986667	98	0.326667	7	0.0233333	1	0.00333333	75	0.25	115	0.383333	4	0.0133333			6	138	236	244	20.6	172936	94989	103340	5764.53
Scaffold_73	297896	298	0.97651	120	0.402685	10	0.033557	2	0.00671141	78	0.261745	81	0.271812	7	0.0234899			23	113	100	173	12.953	232987	159109	207027	7818.36
Scaffold_88	292679	293	0.982935	118	0.40273	10	0.0341297	1	0.00341297	90	0.307167	69	0.235495	5	0.0170648			18	82	138	162	13.0375	232973	181893	155122	7951.3
Scaffold_84	288310	289	0.951557	119	0.411765	9	0.0311419	2	0.00692042	74	0.256055	71	0.245675	14	0.0484429			23	123	194	208	18.1661	253278	177069	160317	8763.94
Scaffold_215	287811	288	0.982639	98	0.340278	5	0.0173611	0	0	46	0.159722	134	0.465278	5	0.0173611			12	167	179	185	18.4375	183468	144965	114898	6370.42
Scaffold_64	287387	288	0.982639	162	0.5625	12	0.0416667	2	0.00694444	58	0.201389	49	0.170139	5	0.0173611			28	98	143	154	13.7153	222683	195880	154360	7732.05
Scaffold_66	279297	280	0.960714	139	0.496429	13	0.0464286	1	0.00357143	77	0.275	39	0.139286	11	0.0392857			24	134	94	218	15.9286	163713	131202	112926	5846.89
Scaffold_100	277799	278	0.985612	96	0.345324	6	0.0215827	2	0.00719424	57	0.205036	113	0.406475	4	0.0143885				89	135	133	12.8417	267004	186147	182026	9604.46
Scaffold_128	276975	277	0.956679	89	0.3213	4	0.0144404	0	0	73	0.263538	99	0.357401	12	0.0433213				125	246	281	23.5379	191998	130417	138444	6931.34
Scaffold_129	274425	275	0.967273	89	0.323636	10	0.0363636	3	0.0109091	62	0.225455	102	0.370909	9	0.0327273				158	241	251	23.6364	242584	162126	173451	8821.24
Scaffold_86	273802	274	0.945255	83	0.30292	15	0.0547445	1	0.00364964	71	0.259124	89	0.324818	15	0.0547445			11	55	123	101	10.1825	211607	126413	154839	7722.88
Scaffold_98	270229	271	0.98524	118	0.435424	9	0.0332103	0	0	58	0.214022	82	0.302583	4	0.0147601			22	84	72	142	10.9963	241647	176601	163778	8916.86
Scaffold_97	266285	267	0.958801	155	0.580524	17	0.0636704	6	0.0224719	57	0.213483	21	0.0786517	11	0.0411985			42	27	50	265	12.809	157459	249319	183557	5897.34
Scaffold_103	264757	265	0.977358	109	0.411321	9	0.0339623	2	0.00754717	51	0.192453	88	0.332075	6	0.0226415				55	108	262	16.0377	203248	170046	133967	7669.74
Scaffold_220	264516	265	0.992453	53	0.2	5	0.0188679	0	0	43	0.162264	162	0.611321	2	0.00754717			2	87	134	109	12.4528	231123	126371	145543	8721.62
Scaffold_120	261507	262	0.950382	83	0.316794	9	0.0343511	1	0.00381679	80	0.305344	76	0.290076	13	0.0496183				128	166	145	16.7557	227476	155139	155310	8682.29
Scaffold_116	260052	261	0.969349	118	0.452107	11	0.0421456	2	0.00766284	63	0.241379	59	0.226054	8	0.0306513				125	198	230	21.1877	193409	163964	138496	7410.31
Scaffold_92	259480	260	0.980769	123	0.473077	14	0.0538462	0	0	48	0.184615	70	0.269231	5	0.0192308			15	132	151	200	18.5769	242306	160769	174229	9319.46
Scaffold_72	256441	257	0.941634	131	0.509728	14	0.0544747	2	0.0077821	69	0.268482	26	0.101167	15	0.0583658			28	36	93	241	14.3969	159859	198543	125480	6220.19
Scaffold_83	253845	254	0.972441	125	0.492126	10	0.0393701	0	0	61	0.240157	51	0.200787	7	0.0275591			27	129	174	215	20.3937	209327	175418	147468	8241.22
Scaffold_101	244615	245	0.967347	99	0.404082	14	0.0571429	1	0.00408163	53	0.216327	70	0.285714	8	0.0326531				56	86	124	10.8571	129555	110666	83047	5287.96
Scaffold_77	241852	242	0.96281	163	0.673554	12	0.0495868	1	0.00413223	50	0.206612	7	0.0289256	9	0.0371901			37	10	108	113	9.54545	157424	284261	134776	6505.12
Scaffold_157	240504	241	0.970954	67	0.278008	8	0.033195	1	0.00414938	50	0.207469	108	0.448133	7	0.0290456			11	110	150	126	16.0166	241591	160696	163976	10024.5
Scaffold_105	238124	239	0.949791	150	0.627615	9	0.0376569	0	0	45	0.188285	23	0.0962343	12	0.0502092				91	82	281	18.9958	157636	252135	117535	6595.65
Scaffold_95	226438	227	0.964758	104	0.45815	11	0.0484581	1	0.00440529	64	0.281938	39	0.171806	8	0.0352423			14	64	116	108	12.6872	157716	111117	139638	6947.84
Scaffold_99	226289	227	0.964758	112	0.493392	13	0.0572687	3	0.0132159	47	0.207048	44	0.193833	8	0.0352423			18	79	143	212	19.1189	189928	205199	151417	8366.87
Scaffold_127	225229	226	0.960177	78	0.345133	16	0.0707965	0	0	61	0.269912	62	0.274336	9	0.039823				85	230	165	21.2389	168313	129815	120111	7447.48
Scaffold_136	225817	226	0.969027	74	0.327434	6	0.0265487	2	0.00884956	47	0.207965	90	0.39823	7	0.0309735				126	179	205	22.5664	174964	122340	109618	7741.77
Scaffold_85	225441	226	0.933628	87	0.384956	11	0.0486726	3	0.0132743	52	0.230088	58	0.256637	15	0.0663717			19	37	44	23	4.60177	115104	117646	81352	5093.1
Scaffold_174	222551	223	0.995516	49	0.219731	10	0.044843	0	0	35	0.156951	128	0.573991	1	0.0044843			1	130	164	127	18.8789	239940	127115	157125	10759.6
Scaffold_121	221208	222	0.941441	96	0.432432	8	0.036036	2	0.00900901	53	0.238739	50	0.225225	13	0.0585586				58	86	198	15.4054	185614	137548	129561	8360.99
Scaffold_173	218748	219	0.981735	36	0.164384	5	0.0228311	1	0.00456621	29	0.13242	144	0.657534	4	0.0182648				70	125	88	12.9224	198861	98339	121420	9080.41
Scaffold_89	207446	208	0.971154	173	0.831731	5	0.0240385	3	0.0144231	14	0.0673077	7	0.0336538	6	0.0288462			59	7	267	298	27.5	190730	485434	167803	9169.71
Scaffold_91	205113	206	0.951456	96	0.466019	10	0.0485437	0	0	66	0.320388	24	0.116505	10	0.0485437			15	106	94	86	13.8835	160715	135214	108773	7801.7
Scaffold_125	201125	202	0.970297	62	0.306931	18	0.0891089	3	0.0148515	52	0.257426	61	0.30198	6	0.029703				118	169	206	24.4059	159617	90396	117198	7901.83
Scaffold_185	201415	202	0.985149	63	0.311881	6	0.029703	0	0	39	0.193069	91	0.450495	3	0.0148515			7	96	117	95	15.2475	191679	132612	122756	9489.06
Scaffold_216	201476	202	0.980198	81	0.40099	4	0.019802	0	0	45	0.222772	68	0.336634	4	0.019802			10	55	175	128	17.7228	185152	134515	128145	9165.94
Scaffold_104	200933	201	0.9801	103	0.512438	8	0.039801	1	0.00497512	50	0.248756	35	0.174129	4	0.0199005				74	107	179	17.9104	157466	132844	111165	7834.13
Scaffold_175	199839	200	0.96	53	0.265	8	0.04	0	0	31	0.155	100	0.5	8	0.04			7	83	132	152	18.35	187269	99535	121598	9363.45
Scaffold_115	194547	195	0.979487	80	0.410256	6	0.0307692	1	0.00512821	51	0.261538	53	0.271795	4	0.0205128				42	98	141	14.4103	152930	130699	94078	7842.56
Scaffold_208	193763	194	0.958763	69	0.35567	11	0.056701	1	0.00515464	29	0.149485	76	0.391753	8	0.0412371			8	47	61	87	10.0515	163070	106872	107545	8405.67
Scaffold_108	191716	192	0.973958	71	0.369792	10	0.0520833	0	0	42	0.21875	64	0.333333	5	0.0260417				90	119	209	21.7708	185783	155964	130519	9676.2
Scaffold_203	191042	192	0.973958	65	0.338542	7	0.0364583	1	0.00520833	38	0.197917	76	0.395833	5	0.0260417			5	63	117	140	16.6667	158188	86855	107358	8238.96
Scaffold_143	190687	191	0.963351	66	0.34555	5	0.026178	1	0.0052356	46	0.240838	66	0.34555	7	0.0366492				127	156	217	26.178	174985	134904	114276	9161.52
Scaffold_155	190454	191	0.968586	56	0.293194	11	0.0575916	0	0	53	0.277487	65	0.340314	6	0.0314136			6	100	114	119	17.4346	183799	120992	130597	9622.98
Scaffold_117	189821	190	0.968421	63	0.331579	7	0.0368421	2	0.0105263	43	0.226316	69	0.363158	6	0.0315789				61	137	77	14.4737	155396	85144	97808	8178.74
Scaffold_163	189440	190	0.984211	95	0.5	3	0.0157895	0	0	51	0.268421	38	0.2	3	0.0157895			14	64	53	108	11.8421	178454	139829	130291	9392.32
Scaffold_172	189956	190	0.963158	69	0.363158	5	0.0263158	1	0.00526316	44	0.231579	64	0.336842	7	0.0368421			9	57	82	92	12.1579	161907	111939	104206	8521.42
Scaffold_110	187038	188	0.978723	57	0.303191	20	0.106383	3	0.0159574	52	0.276596	52	0.276596	4	0.0212766				39	59	96	10.3191	155408	116748	103969	8266.38
Scaffold_126	185989	186	0.956989	49	0.263441	8	0.0430108	0	0	54	0.290323	67	0.360215	8	0.0430108				51	90	99	12.9032	144201	92074	96970	7752.74
Scaffold_132	183396	184	0.961957	57	0.309783	13	0.0706522	1	0.00543478	37	0.201087	69	0.375	7	0.0380435				68	95	69	12.6087	133918	92986	89842	7278.15
Scaffold_188	180216	181	0.961326	52	0.287293	8	0.0441989	2	0.0110497	31	0.171271	81	0.447514	7	0.038674			6	81	70	97	13.7017	132978	88424	81079	7346.85
Scaffold_114	179335	180	0.955556	102	0.566667	15	0.0833333	1	0.00555556	41	0.227778	13	0.0722222	8	0.0444444				57	105	227	21.6111	110269	146632	121497	6126.06
Scaffold_122	178128	179	0.96648	85	0.47486	4	0.0223464	1	0.00558659	41	0.22905	42	0.234637	6	0.0335196				43	99	135	15.4749	148802	122973	99329	8312.96
Scaffold_107	177865	178	0.955056	74	0.41573	14	0.0786517	0	0	43	0.241573	39	0.219101	8	0.0449438				59	89	113	14.6629	143899	105584	105433	8084.21
Scaffold_130	175692	176	0.982955	79	0.448864	2	0.0113636	0	0	49	0.278409	43	0.244318	3	0.0170455				65	105	109	15.8523	139179	92836	95802	7907.9
Scaffold_167	175282	176	0.977273	60	0.340909	10	0.0568182	0	0	53	0.301136	49	0.278409	4	0.0227273			8	99	128	142	20.9659	171054	125823	108975	9718.98
Scaffold_142	174721	175	1	57	0.325714	6	0.0342857	2	0.0114286	46	0.262857	64	0.365714	0	0				126	144	174	25.3714	134834	102102	88287	7704.8
Scaffold_146	173111	174	0.994253	46	0.264368	2	0.0114943	0	0	31	0.178161	94	0.54023	1	0.00574713				78	160	146	22.069	192911	97185	120788	11086.8
Scaffold_119	172636	173	0.953757	89	0.514451	18	0.104046	3	0.017341	45	0.260116	10	0.0578035	8	0.0462428				71	104	171	20	112690	179489	99994	6513.87
Scaffold_150	172513	173	0.976879	64	0.369942	8	0.0462428	0	0	41	0.236994	56	0.323699	4	0.0231214				38	56	103	11.3873	155858	96437	116312	9009.13
Scaffold_138	171735	172	0.965116	51	0.296512	16	0.0930233	0	0	50	0.290698	49	0.284884	6	0.0348837				35	85	115	13.6628	125022	65955	121903	7268.72
Scaffold_140	171604	172	0.982558	84	0.488372	2	0.0116279	2	0.0116279	39	0.226744	42	0.244186	3	0.0174419				79	99	196	21.7442	147403	138887	97301	8569.94
Scaffold_161	170229	171	0.982456	66	0.385965	6	0.0350877	1	0.00584795	34	0.19883	61	0.356725	3	0.0175439			12	61	104	127	17.076	193231	122182	122496	11300.1
Scaffold_194	170500	171	0.988304	29	0.169591	1	0.00584795	0	0	36	0.210526	103	0.602339	2	0.0116959			193	60	92	77	13.3918	192442	96916	122209	11253.9
Scaffold_151	167253	168	0.970238	49	0.291667	7	0.0416667	1	0.00595238	37	0.220238	69	0.410714	5	0.0297619				73	117	97	17.0833	160016	95535	113082	9524.76
Scaffold_158	167891	168	0.988095	48	0.285714	5	0.0297619	1	0.00595238	29	0.172619	83	0.494048	2	0.0119048				68	82	186	20	202534	121959	142433	12055.6
Scaffold_156	166489	167	0.982036	54	0.323353	9	0.0538922	0	0	49	0.293413	52	0.311377	3	0.0179641				58	92	148	17.8443	196744	159454	133161	11781.1
Scaffold_201	165919	166	0.987952	46	0.277108	5	0.0301205	1	0.0060241	33	0.198795	79	0.475904	2	0.0120482			4	72	171	111	21.3253	154412	104915	107635	9301.93
Scaffold_139	164643	165	0.951515	82	0.49697	15	0.0909091	0	0	36	0.218182	24	0.145455	8	0.0484848				36	38	135	12.6667	123465	124269	80921	7482.73
Scaffold_133	163776	164	0.97561	82	0.5	4	0.0243902	0	0	43	0.262195	31	0.189024	4	0.0243902				72	75	83	14.0244	116958	87425	85402	7131.59
Scaffold_162	161346	162	0.975309	52	0.320988	10	0.0617284	0	0	25	0.154321	71	0.438272	4	0.0246914				39	70	68	10.9259	120743	69819	79075	7453.27
Scaffold_149	157092	158	0.993671	70	0.443038	3	0.0189873	1	0.00632911	34	0.21519	49	0.310127	1	0.00632911				94	107	113	19.8734	133332	92822	85729	8438.73
Scaffold_164	157828	158	0.974684	63	0.398734	6	0.0379747	1	0.00632911	32	0.202532	52	0.329114	4	0.0253165			7	116	145	123	24.3038	147762	103252	102905	9352.03
Scaffold_251	157101	158	0.981013	58	0.367089	5	0.0316456	2	0.0126582	34	0.21519	56	0.35443	3	0.0189873			8	109	0	247	22.5316	126245	101749	84134	7990.19
Scaffold_153	156035	157	1	39	0.248408	5	0.0318471	1	0.00636943	33	0.210191	79	0.503185	0	0				54	90	128	17.3248	134872	67190	80666	8590.57
Scaffold_197	154578	155	0.993548	36	0.232258	4	0.0258065	0	0	34	0.219355	80	0.516129	1	0.00645161			1	72	92	121	18.3871	188101	100228	131502	12135.5
Scaffold_154	153478	154	0.974026	68	0.441558	8	0.0519481	2	0.012987	19	0.123377	53	0.344156	4	0.025974				64	82	101	16.039	137808	116307	92061	8948.57
Scaffold_135	151980	152	0.967105	82	0.539474	6	0.0394737	0	0	38	0.25	21	0.138158	5	0.0328947				51	80	129	17.1053	121422	85044	100007	7988.29
Scaffold_141	151127	152	0.953947	52	0.342105	9	0.0592105	0	0	30	0.197368	54	0.355263	7	0.0460526				40	50	87	11.6447	116403	86236	76752	7658.09
Scaffold_144	151125	152	0.986842	64	0.421053	8	0.0526316	0	0	42	0.276316	36	0.236842	2	0.0131579				129	135	173	28.75	144452	105563	93634	9503.42
Scaffold_145	151759	152	0.980263	62	0.407895	5	0.0328947	2	0.0131579	32	0.210526	48	0.315789	3	0.0197368				97	115	141	23.2237	129891	82966	85712	8545.46
Scaffold_180	151086	152	0.953947	54	0.355263	3	0.0197368	1	0.00657895	30	0.197368	57	0.375	7	0.0460526			5	59	35	69	10.7237	130670	94107	87209	8596.71
Scaffold_147	149408	150	0.986667	59	0.393333	1	0.00666667	0	0	37	0.246667	51	0.34	2	0.0133333				76	97	122	19.6667	127103	96064	84712	8473.53
Scaffold_152	149952	150	0.993333	45	0.3	4	0.0266667	0	0	37	0.246667	63	0.42	1	0.00666667				42	62	97	13.4	91899	56552	64840	6126.6
Scaffold_195	149742	150	0.993333	39	0.26	2	0.0133333	0	0	23	0.153333	85	0.566667	1	0.00666667			4	73	81	98	16.8	138276	92713	87563	9218.4
Scaffold_178	148108	149	0.979866	34	0.228188	4	0.0268456	0	0	37	0.248322	71	0.47651	3	0.0201342			3	30	71	63	11.0067	147066	84433	94403	9870.2
Scaffold_264	148522	149	0.95302	44	0.295302	3	0.0201342	0	0	27	0.181208	68	0.456376	7	0.0469799			7	59	69	77	13.7584	121701	80918	77659	8167.85
Scaffold_292	147059	148	0.993243	22	0.148649	4	0.027027	0	0	26	0.175676	95	0.641892	1	0.00675676			122	74	133	97	20.5405	135092	69476	87970	9127.84
Scaffold_193	146324	147	0.979592	60	0.408163	7	0.047619	0	0	35	0.238095	42	0.285714	3	0.0204082			10	20	94	89	13.8095	108574	88361	75970	7385.99
Scaffold_148	145553	146	0.965753	43	0.294521	4	0.0273973	1	0.00684932	49	0.335616	44	0.30137	5	0.0342466				77	68	116	17.8767	91998	79369	57824	6301.23
Scaffold_192	145406	146	0.986301	43	0.294521	3	0.0205479	1	0.00684932	29	0.19863	68	0.465753	2	0.0136986			5	40	41	62	9.79452	91459	54107	55417	6264.32
Scaffold_166	144671	145	0.951724	58	0.4	15	0.103448	0	0	46	0.317241	19	0.131034	7	0.0482759				82	89	102	18.8276	105110	111741	73017	7248.97
Scaffold_170	144979	145	0.972414	52	0.358621	6	0.0413793	0	0	34	0.234483	49	0.337931	4	0.0275862				76	65	159	20.6897	145050	91353	91873	10003.4
Scaffold_182	144500	145	0.993103	42	0.289655	8	0.0551724	1	0.00689655	34	0.234483	59	0.406897	1	0.00689655			3	60	119	98	19.1034	149270	99105	96437	10294.5
Scaffold_190	144486	145	0.986207	57	0.393103	7	0.0482759	1	0.00689655	31	0.213793	47	0.324138	2	0.0137931			8	28	0	161	13.0345	90839	69280	56934	6264.76
Scaffold_327	143290	144	1	32	0.222222	1	0.00694444	0	0	24	0.166667	87	0.604167	0	0			89	27	97	81	14.2361	169916	107296	121292	11799.7
Scaffold_159	142188	143	0.986014	53	0.370629	6	0.041958	0	0	38	0.265734	44	0.307692	2	0.013986				44	87	50	12.6573	125791	93288	94884	8796.57
Scaffold_181	141443	142	0.978873	53	0.373239	7	0.0492958	0	0	34	0.239437	45	0.316901	3	0.0211268			6	46	56	135	16.6901	82688	61959	66490	5823.1
Scaffold_227	141837	142	0.964789	46	0.323944	5	0.0352113	1	0.00704225	24	0.169014	61	0.429577	5	0.0352113			4	42	120	91	17.8169	130795	77692	79860	9210.92
Scaffold_278	139444	140	0.985714	28	0.2	3	0.0214286	0	0	23	0.164286	84	0.6	2	0.0142857			119	73	102	96	19.3571	130043	70898	85265	9288.79
Scaffold_189	137402	138	0.992754	31	0.224638	0	0	0	0	22	0.15942	84	0.608696	1	0.00724638			2	59	192	121	26.9565	124513	81003	83706	9022.68
Scaffold_212	137341	138	0.978261	32	0.231884	2	0.0144928	3	0.0217391	14	0.101449	84	0.608696	3	0.0217391			1	23	42	54	8.62319	92180	50728	57902	6679.71
Scaffold_187	136520	137	0.985401	53	0.386861	4	0.0291971	1	0.00729927	39	0.284672	38	0.277372	2	0.0145985			6	47	69	96	15.4745	111071	66536	74367	8107.37
Scaffold_221	135869	136	0.985294	49	0.360294	6	0.0441176	0	0	23	0.169118	56	0.411765	2	0.0147059			10	53	48	40	10.3676	113230	91534	77690	8325.74
Scaffold_171	134341	135	0.962963	39	0.288889	6	0.0444444	0	0	33	0.244444	52	0.385185	5	0.037037				79	84	172	24.8148	101762	72549	71901	7537.93
Scaffold_199	134681	135	0.985185	36	0.266667	2	0.0148148	0	0	23	0.17037	72	0.533333	2	0.0148148			151	68	46	124	17.6296	174058	89284	112387	12893.2
Scaffold_204	134092	135	0.948148	47	0.348148	8	0.0592593	0	0	26	0.192593	47	0.348148	7	0.0518519			12	28	28	21	5.7037	81798	56285	57233	6059.11
Scaffold_243	134416	135	1	32	0.237037	3	0.0222222	0	0	25	0.185185	75	0.555556	0	0			169	32	97	68	14.5926	157389	77702	96580	11658.4
Scaffold_169	132593	133	1	49	0.368421	3	0.0225564	1	0.0075188	38	0.285714	42	0.315789	0	0				83	42	154	20.9774	91662	70036	73661	6891.88
Scaffold_186	132976	133	0.93985	43	0.323308	4	0.0300752	0	0	37	0.278195	41	0.308271	8	0.0601504			158	43	87	92	16.6917	130551	78863	89834	9815.86
Scaffold_202	132661	133	0.969925	32	0.240602	6	0.0451128	0	0	43	0.323308	48	0.360902	4	0.0300752			6	63	32	61	11.7293	96568	62235	84515	7260.75
Scaffold_229	132202	133	0.977444	52	0.390977	1	0.0075188	0	0	29	0.218045	48	0.360902	3	0.0225564			8	76	96	82	19.0977	140139	81412	94329	10536.8
Scaffold_231	132444	133	0.984962	65	0.488722	11	0.0827068	0	0	27	0.203008	28	0.210526	2	0.0150376			18	45	47	97	14.2105	105620	95649	96171	7941.35
Scaffold_160	131573	132	0.977273	52	0.393939	5	0.0378788	1	0.00757576	48	0.363636	23	0.174242	3	0.0227273				86	283	165	40.4545	91088	65420	86931	6900.61
Scaffold_176	131012	132	0.969697	31	0.234848	6	0.0454545	2	0.0151515	48	0.363636	41	0.310606	4	0.030303			166	59	62	38	12.0455	114610	77049	86180	8682.58
Scaffold_223	131134	132	0.992424	24	0.181818	4	0.030303	0	0	37	0.280303	66	0.5	1	0.00757576			5	60	84	93	17.9545	159452	93899	113177	12079.7
Scaffold_300	131792	132	0.992424	35	0.265152	6	0.0454545	1	0.00757576	15	0.113636	74	0.560606	1	0.00757576			1	47	6	253	23.1818	119470	64073	83509	9050.76
Scaffold_165	130768	131	0.961832	62	0.473282	3	0.0229008	1	0.00763359	31	0.236641	29	0.221374	5	0.0381679				87	36	127	19.084	114706	78993	79071	8756.18
Scaffold_209	130276	131	0.938931	58	0.442748	11	0.0839695	0	0	29	0.221374	25	0.19084	8	0.0610687			8	54	60	89	15.4962	104984	74868	67882	8014.05
Scaffold_217	130919	131	0.969466	55	0.419847	7	0.0534351	0	0	18	0.137405	47	0.358779	4	0.0305344			6	68	68	62	15.1145	142378	91717	101628	10868.5
Scaffold_184	129306	130	0.946154	54	0.415385	4	0.0307692	0	0	39	0.3	26	0.2	7	0.0538462			142	52	61	78	14.6923	106227	85287	87536	8171.31
Scaffold_235	129698	130	0.992308	39	0.3	5	0.0384615	1	0.00769231	28	0.215385	56	0.430769	1	0.00769231			3	46	51	89	14.3077	109066	71763	66973	8389.69
Scaffold_242	129935	130	0.976923	39	0.3	3	0.0230769	1	0.00769231	25	0.192308	59	0.453846	3	0.0230769			6	64	47	41	11.6923	98517	60905	66643	7578.23
Scaffold_258	129336	130	0.984615	23	0.176923	6	0.0461538	2	0.0153846	16	0.123077	81	0.623077	2	0.0153846			81	37	108	56	15.4615	140203	80215	95149	10784.8
Scaffold_183	127470	128	0.976562	57	0.445312	6	0.046875	0	0	35	0.273438	27	0.210938	3	0.0234375			147	38	31	84	11.9531	95171	64525	84063	7435.23
Scaffold_232	127116	128	0.96875	45	0.351562	4	0.03125	0	0	31	0.242188	44	0.34375	4	0.03125			8	44	50	66	12.5	105309	75948	65845	8227.27
Scaffold_177	126444	127	1	30	0.23622	6	0.0472441	0	0	24	0.188976	67	0.527559	0	0			137	128	102	166	31.1811	133531	84473	81461	10514.3
Scaffold_213	126741	127	0.968504	40	0.314961	2	0.015748	3	0.023622	32	0.251969	46	0.362205	4	0.0314961			2	50	26	87	12.8346	117403	69382	74624	9244.33
Scaffold_196	125565	126	0.968254	47	0.373016	7	0.0555556	1	0.00793651	47	0.373016	20	0.15873	4	0.031746			161	22	49	71	11.2698	108143	68542	82226	8582.78
Scaffold_234	125465	126	0.960317	40	0.31746	4	0.031746	2	0.015873	35	0.277778	40	0.31746	5	0.0396825			2	21	38	84	11.3492	96475	62356	63019	7656.75
Scaffold_238	125141	126	0.952381	40	0.31746	5	0.0396825	1	0.00793651	35	0.277778	39	0.309524	6	0.047619			4	33	27	34	7.46032	101482	59147	86496	8054.13
Scaffold_246	125164	126	0.984127	43	0.34127	4	0.031746	0	0	35	0.277778	42	0.333333	2	0.015873			15	57	48	70	13.8889	98584	68833	69027	7824.13
Scaffold_179	124842	125	0.976	48	0.384	2	0.016	0	0	30	0.24	42	0.336	3	0.024			149	85	80	147	24.96	132626	97954	92579	10610.1
Scaffold_191	121248	122	0.942623	45	0.368852	3	0.0245902	0	0	31	0.254098	36	0.295082	7	0.057377			140	82	113	47	19.8361	94735	66032	61408	7765.16
Scaffold_225	121350	122	0.967213	40	0.327869	3	0.0245902	0	0	25	0.204918	50	0.409836	4	0.0327869			6	29	48	52	10.5738	63380	60980	39667	5195.08
Scaffold_259	121153	122	0.983607	36	0.295082	5	0.0409836	0	0	23	0.188525	56	0.459016	2	0.0163934			1	78	101	107	23.4426	132860	64674	86314	10890.2
Scaffold_262	121671	122	0.983607	41	0.336066	1	0.00819672	1	0.00819672	25	0.204918	52	0.42623	2	0.0163934			5	35	21	41	7.95082	88195	86025	55589	7229.1
Scaffold_236	120622	121	0.975207	39	0.322314	4	0.0330579	0	0	15	0.123967	60	0.495868	3	0.0247934			5	32	64	123	18.0992	116123	83821	73736	9596.94
Scaffold_249	119110	120	0.975	26	0.216667	5	0.0416667	0	0	38	0.316667	48	0.4	3	0.025			1	56	61	60	14.75	144418	99076	97471	12034.8
Scaffold_266	119137	120	0.983333	28	0.233333	3	0.025	0	0	18	0.15	69	0.575	2	0.0166667			1	41	74	82	16.4167	113384	57895	71295	9448.67
Scaffold_268	119697	120	0.983333	52	0.433333	2	0.0166667	0	0	19	0.158333	45	0.375	2	0.0166667			4	33	89	66	15.6667	126342	81620	84053	10528.5
Scaffold_271	119143	120	1	42	0.35	4	0.0333333	1	0.00833333	17	0.141667	56	0.466667	0	0			9	175	0	122	24.75	91452	65017	61315	7621
Scaffold_198	118675	119	0.97479	103	0.865546	0	0	0	0	10	0.0840336	3	0.0252101	3	0.0252101			14	1	12	156	14.2017	110362	303170	95710	9274.12
Scaffold_200	118596	119	0.991597	48	0.403361	4	0.0336134	1	0.00840336	34	0.285714	31	0.260504	1	0.00840336			137	70	0	112	15.2941	81086	53609	67877	6813.95
Scaffold_206	118445	119	0.97479	38	0.319328	4	0.0336134	1	0.00840336	23	0.193277	50	0.420168	3	0.0252101			2	69	141	144	29.7479	125006	67536	80080	10504.7
Scaffold_226	118393	119	0.97479	46	0.386555	2	0.0168067	0	0	30	0.252101	38	0.319328	3	0.0252101			7	48	102	92	20.3361	121950	87929	79284	10247.9
Scaffold_288	118523	119	0.97479	55	0.462185	3	0.0252101	1	0.00840336	18	0.151261	39	0.327731	3	0.0252101			9	48	40	74	13.6134	113148	77021	77996	9508.24
Scaffold_210	117963	118	0.983051	56	0.474576	6	0.0508475	0	0	29	0.245763	25	0.211864	2	0.0169492			10	29	0	90	10.0847	104635	83513	66490	8867.37
Scaffold_224	117573	118	0.966102	45	0.381356	6	0.0508475	0	0	26	0.220339	37	0.313559	4	0.0338983			11	66	182	169	35.339	117043	89759	75209	9918.9
Scaffold_205	115495	116	0.956897	63	0.543103	4	0.0344828	0	0	26	0.224138	18	0.155172	5	0.0431034			136	134	17	85	20.3448	80522	61641	55337	6941.55
Scaffold_207	115923	116	0.913793	51	0.439655	5	0.0431034	1	0.00862069	26	0.224138	23	0.198276	10	0.0862069			10	12	69	109	16.3793	70572	72972	120718	6083.79
Scaffold_211	115555	116	0.982759	50	0.431034	7	0.0603448	2	0.0172414	23	0.198276	32	0.275862	2	0.0172414			5	26	56	85	14.3966	112097	70334	78306	9663.53
Scaffold_222	115153	116	0.974138	29	0.25	1	0.00862069	0	0	36	0.310345	47	0.405172	3	0.0258621			2	29	18	23	6.03448	73583	37159	52925	6343.36
Scaffold_230	113962	114	0.982456	36	0.315789	8	0.0701754	0	0	32	0.280702	36	0.315789	2	0.0175439			5	55	48	76	15.7018	110097	63147	73340	9657.63
Scaffold_269	113859	114	0.991228	39	0.342105	4	0.0350877	1	0.00877193	25	0.219298	44	0.385965	1	0.00877193			2	32	91	70	16.9298	120924	64096	86808	10607.4
Scaffold_214	111794	112	0.964286	59	0.526786	9	0.0803571	1	0.00892857	20	0.178571	19	0.169643	4	0.0357143			9	68	37	79	16.4286	84904	64401	61591	7580.71
Scaffold_218	111526	112	0.946429	53	0.473214	5	0.0446429	0	0	29	0.258929	19	0.169643	6	0.0535714			9	16	68	114	17.6786	89165	75877	61934	7961.16
Scaffold_219	111179	112	0.973214	58	0.517857	5	0.0446429	0	0	19	0.169643	27	0.241071	3	0.0267857			10	126	26	60	18.9286	76145	57616	47728	6798.66
Scaffold_261	111253	112	1	35	0.3125	8	0.0714286	0	0	32	0.285714	37	0.330357	0	0			6	98	47	86	20.625	112000	70149	78675	10000
Scaffold_362	111889	112	0.964286	48	0.428571	2	0.0178571	0	0	20	0.178571	38	0.339286	4	0.0357143			8	59	38	202	26.6964	122879	82619	83192	10971.3
Scaffold_233	110466	111	0.972973	28	0.252252	2	0.018018	0	0	21	0.189189	57	0.513514	3	0.027027			3	35	105	65	18.4685	130897	81128	82458	11792.5
Scaffold_240	110632	111	0.972973	28	0.252252	2	0.018018	1	0.00900901	30	0.27027	47	0.423423	3	0.027027			10	43	33	103	16.1261	113628	72053	74698	10236.8
Scaffold_273	110984	111	0.972973	37	0.333333	5	0.045045	1	0.00900901	21	0.189189	44	0.396396	3	0.027027			5	44	138	66	22.3423	86836	46242	69556	7823.06
Scaffold_310	110223	111	1	33	0.297297	1	0.00900901	0	0	17	0.153153	60	0.540541	0	0			4	27	2	70	8.91892	101332	70540	65201	9129.01
Scaffold_347	108592	109	0.954128	37	0.33945	5	0.0458716	0	0	28	0.256881	34	0.311927	5	0.0458716			11	41	82	84	18.9908	90346	111640	57384	8288.62
Scaffold_228	107360	108	0.916667	56	0.518519	8	0.0740741	2	0.0185185	14	0.12963	19	0.175926	9	0.0833333			25	11	51	33	8.7963	74259	147992	77932	6875.83
Scaffold_241	107008	108	0.981481	32	0.296296	4	0.037037	0	0	24	0.222222	46	0.425926	2	0.0185185			103	33	105	61	18.4259	133603	69283	87238	12370.6
Scaffold_276	107112	108	0.981481	38	0.351852	2	0.0185185	0	0	14	0.12963	52	0.481481	2	0.0185185			3	39	76	74	17.5	113971	67518	73402	10552.9
Scaffold_237	106429	107	0.943925	34	0.317757	1	0.00934579	0	0	26	0.242991	40	0.373832	6	0.0560748			4	62	79	54	18.2243	106877	57266	68318	9988.5
Scaffold_248	106726	107	0.990654	41	0.383178	7	0.0654206	0	0	15	0.140187	43	0.401869	1	0.00934579			4	49	40	99	17.5701	87048	72338	56058	8135.33
Scaffold_260	106825	107	0.971963	50	0.46729	8	0.0747664	0	0	26	0.242991	20	0.186916	3	0.0280374			10	26	6	100	12.3364	91380	83142	55774	8540.19
Scaffold_267	106553	107	0.981308	21	0.196262	1	0.00934579	0	0	22	0.205607	61	0.570093	2	0.0186916			1	93	63	114	25.2336	100369	52193	63498	9380.28
Scaffold_244	105051	106	0.971698	45	0.424528	3	0.0283019	1	0.00943396	23	0.216981	31	0.292453	3	0.0283019			11	35	80	80	18.3962	81290	86083	63197	7668.87
Scaffold_253	105642	106	1	36	0.339623	2	0.0188679	0	0	24	0.226415	44	0.415094	0	0			4	43	55	108	19.434	88493	60901	61365	8348.4
Scaffold_256	105596	106	1	28	0.264151	2	0.0188679	0	0	21	0.198113	55	0.518868	0	0			1	36	81	51	15.8491	94989	49111	62436	8961.23
Scaffold_272	105868	106	0.990566	26	0.245283	1	0.00943396	0	0	29	0.273585	49	0.462264	1	0.00943396			4	79	49	150	26.2264	98248	61154	64569	9268.68
Scaffold_274	105232	106	0.981132	35	0.330189	3	0.0283019	3	0.0283019	22	0.207547	41	0.386792	2	0.0188679			4	36	173	90	28.2075	117877	78113	79742	11120.5
Scaffold_277	105020	106	0.981132	36	0.339623	7	0.0660377	0	0	30	0.283019	31	0.292453	2	0.0188679			4	35	41	41	11.0377	89454	50305	85562	8439.06
Scaffold_299	105781	106	0.981132	26	0.245283	2	0.0188679	0	0	22	0.207547	54	0.509434	2	0.0188679			3	37	64	60	15.1887	95518	61609	62441	9011.13
Scaffold_247	104862	105	0.971429	50	0.47619	1	0.00952381	0	0	18	0.171429	33	0.314286	3	0.0285714			5	47	26	77	14.2857	75032	48046	48350	7145.9
Scaffold_379	104850	105	0.990476	23	0.219048	2	0.0190476	0	0	17	0.161905	62	0.590476	1	0.00952381			95	32	107	92	22	137987	78796	94557	13141.6
Scaffold_265	103697	104	0.961538	35	0.336538	5	0.0480769	0	0	17	0.163462	43	0.413462	4	0.0384615			2	32	48	70	14.4231	106235	65389	66553	10214.9
Scaffold_250	102335	103	0.990291	26	0.252427	2	0.0194175	1	0.00970874	18	0.174757	55	0.533981	1	0.00970874			5	95	7	44	14.1748	67753	40247	44158	6577.96
Scaffold_252	102644	103	0.980583	20	0.194175	1	0.00970874	0	0	15	0.145631	65	0.631068	2	0.0194175			5	60	199	128	37.5728	108151	79398	69983	10500.1
Scaffold_257	102991	103	1	26	0.252427	3	0.0291262	0	0	23	0.223301	51	0.495146	0	0			3	36	51	110	19.1262	112119	60820	83991	10885.3
Scaffold_245	101014	102	0.960784	48	0.470588	3	0.0294118	1	0.00980392	27	0.264706	19	0.186275	4	0.0392157			13	42	72	49	15.9804	81090	50405	50962	7950
Scaffold_346	101030	102	0.980392	36	0.352941	3	0.0294118	0	0	20	0.196078	41	0.401961	2	0.0196078			4	52	42	50	14.1176	109064	57087	66263	10692.5
Scaffold_353	101080	102	0.990196	15	0.147059	2	0.0196078	0	0	15	0.147059	69	0.676471	1	0.00980392			108	56	78	47	17.7451	116356	59880	74578	11407.5
Scaffold_239	100290	101	0.970297	45	0.445545	3	0.029703	0	0	17	0.168317	33	0.326733	3	0.029703			8	55	77	41	17.1287	83321	58732	55125	8249.6
Scaffold_263	100213	101	0.970297	40	0.39604	3	0.029703	1	0.00990099	24	0.237624	30	0.29703	3	0.029703			10	28	56	61	14.3564	84118	70638	55004	8328.51
Scaffold_283	100335	101	0.980198	41	0.405941	7	0.0693069	3	0.029703	24	0.237624	24	0.237624	2	0.019802			8	31	22	18	7.0297	45435	57757	29238	4498.51
Scaffold_293	100472	101	0.980198	28	0.277228	3	0.029703	0	0	22	0.217822	46	0.455446	2	0.019802			1	44	57	96	19.505	120194	74299	80669	11900.4
Scaffold_317	100390	101	0.980198	38	0.376238	7	0.0693069	0	0	14	0.138614	40	0.39604	2	0.019802			2	39	79	62	17.8218	98816	50478	63930	9783.76
Scaffold_331	100365	101	0.970297	46	0.455446	4	0.039604	1	0.00990099	18	0.178218	29	0.287129	3	0.029703			5	116	0	107	22.0792	85192	58268	54449	8434.85
Scaffold_371	100769	101	0.990099	39	0.386139	4	0.039604	0	0	21	0.207921	36	0.356436	1	0.00990099			9	53	0	58	10.9901	78536	50996	48764	7775.84
Scaffold_254	99203	100	0.98	43	0.43	8	0.08	0	0	20	0.2	27	0.27	2	0.02			8	24	22	27	7.3	67776	41726	47460	6777.6
Scaffold_323	99566	100	0.99	23	0.23	2	0.02	1	0.01	15	0.15	58	0.58	1	0.01			3	44	63	92	19.9	100631	51402	63001	10063.1
Scaffold_280	98138	99	0.959596	43	0.434343	2	0.020202	1	0.010101	21	0.212121	28	0.282828	4	0.040404			4	34	229	65	33.1313	79977	48520	70186	8078.48
Scaffold_281	98464	99	0.969697	48	0.484848	3	0.030303	0	0	26	0.262626	19	0.191919	3	0.030303			6	41	67	53	16.2626	79488	68982	49171	8029.09
Scaffold_286	98761	99	0.989899	16	0.161616	3	0.030303	0	0	19	0.191919	60	0.606061	1	0.010101			72	48	86	63	19.899	83349	41320	52540	8419.09
Scaffold_287	98411	99	0.969697	34	0.343434	4	0.040404	0	0	23	0.232323	35	0.353535	3	0.030303			4	37	86	50	17.4747	82769	56135	51851	8360.51
Scaffold_302	98555	99	0.939394	20	0.20202	4	0.040404	0	0	28	0.282828	41	0.414141	6	0.0606061			4	40	20	34	9.49495	59144	39211	36516	5974.14
Scaffold_289	97416	98	1	49	0.5	3	0.0306122	0	0	17	0.173469	29	0.295918	0	0			6	29	38	92	16.2245	83267	68978	52879	8496.63
Scaffold_294	97832	98	1	4	0.0408163	7	0.0714286	0	0	27	0.27551	60	0.612245	0	0			1	47	47	59	15.6122	93465	52465	62006	9537.24
Scaffold_312	97106	98	0.969388	59	0.602041	2	0.0204082	1	0.0102041	20	0.204082	13	0.132653	3	0.0306122			11	21	29	76	12.8571	116409	104915	80235	11878.5
Scaffold_282	96099	97	1	48	0.494845	2	0.0206186	0	0	16	0.164948	31	0.319588	0	0			3	32	127	91	25.7732	90158	50510	63034	9294.64
Scaffold_284	96580	97	0.969072	21	0.216495	4	0.0412371	0	0	19	0.195876	50	0.515464	3	0.0309278			5	46	22	67	13.9175	60269	45506	36206	6213.3
Scaffold_290	96059	97	0.989691	26	0.268041	3	0.0309278	0	0	21	0.216495	46	0.474227	1	0.0103093			10	55	3	76	13.8144	56513	45236	46277	5826.08
Scaffold_291	96733	97	1	18	0.185567	0	0	0	0	21	0.216495	58	0.597938	0	0			1	48	1	82	13.5052	92374	53171	58154	9523.09
Scaffold_295	96899	97	1	24	0.247423	2	0.0206186	0	0	23	0.237113	48	0.494845	0	0			4	37	74	79	19.5876	94849	64959	59978	9778.25
Scaffold_307	96025	97	0.958763	31	0.319588	6	0.0618557	0	0	27	0.278351	29	0.298969	4	0.0412371			142	46	71	84	20.7216	73683	52533	47416	7596.19
Scaffold_255	95902	96	0.96875	54	0.5625	1	0.0104167	0	0	18	0.1875	20	0.208333	3	0.03125			8	14	63	73	15.625	64253	82624	42496	6693.02
Scaffold_279	95803	96	0.989583	36	0.375	3	0.03125	0	0	29	0.302083	27	0.28125	1	0.0104167			8	96	48	52	20.4167	83684	69847	59825	8717.08
Scaffold_270	94697	95	0.978947	39	0.410526	4	0.0421053	1	0.0105263	17	0.178947	32	0.336842	2	0.0210526			5	29	0	67	10.1053	110747	75439	74469	11657.6
Scaffold_296	94949	95	1	31	0.326316	1	0.0105263	1	0.0105263	22	0.231579	40	0.421053	0	0			7	37	65	82	19.3684	91288	55877	57581	9609.26
Scaffold_306	94901	95	0.978947	39	0.410526	4	0.0421053	0	0	18	0.189474	32	0.336842	2	0.0210526			3	42	70	133	25.7895	99940	57502	67002	10520
Scaffold_340	94676	95	0.978947	24	0.252632	2	0.0210526	0	0	13	0.136842	54	0.568421	2	0.0210526			1	56	78	81	22.6316	101769	51413	63745	10712.5
Scaffold_390	94496	95	0.989474	39	0.410526	3	0.0315789	0	0	24	0.252632	28	0.294737	1	0.0105263			5	18	2	68	9.26316	72960	48079	45956	7680
Scaffold_275	93048	94	1	36	0.382979	5	0.0531915	1	0.0106383	29	0.308511	23	0.244681	0	0			5	33	45	76	16.383	85364	69867	55207	9081.28
Scaffold_319	93502	94	0.978723	16	0.170213	1	0.0106383	1	0.0106383	9	0.0957447	65	0.691489	2	0.0212766			102	36	103	122	27.766	82466	40986	51326	8772.98
Scaffold_354	93327	94	0.968085	24	0.255319	1	0.0106383	0	0	24	0.255319	42	0.446809	3	0.0319149			2	17	79	34	13.8298	74759	50489	53355	7953.09
Scaffold_411	93362	94	0.968085	15	0.159574	4	0.0425532	1	0.0106383	11	0.117021	60	0.638298	3	0.0319149			63	40	50	40	13.8298	95760	54559	65481	10187.2
Scaffold_423	93932	94	0.978723	27	0.287234	2	0.0212766	1	0.0106383	16	0.170213	46	0.489362	2	0.0212766			1	65	33	50	15.7447	73138	49990	46883	7780.64
Scaffold_426	93835	94	0.978723	15	0.159574	0	0	0	0	14	0.148936	63	0.670213	2	0.0212766			1	25	86	121	24.6809	137799	84196	95804	14659.5
Scaffold_301	92405	93	0.978495	14	0.150538	4	0.0430108	0	0	26	0.27957	47	0.505376	2	0.0215054			3	30	31	61	13.1183	92164	45307	60971	9910.11
Scaffold_305	92434	93	0.978495	31	0.333333	7	0.0752688	0	0	30	0.322581	23	0.247312	2	0.0215054			8	25	14	58	10.4301	51632	26820	41160	5551.83
Scaffold_336	92195	93	0.978495	35	0.376344	3	0.0322581	0	0	16	0.172043	37	0.397849	2	0.0215054			13	20	47	62	13.871	86312	85873	58171	9280.86
Scaffold_337	92199	93	1	29	0.311828	3	0.0322581	0	0	12	0.129032	49	0.526882	0	0			6	70	40	52	17.4194	51336	33272	29636	5520
Scaffold_363	92137	93	1	17	0.182796	2	0.0215054	0	0	21	0.225806	53	0.569892	0	0			4	50	130	72	27.0968	80241	39927	49366	8628.06
Scaffold_389	92965	93	0.989247	21	0.225806	4	0.0430108	0	0	25	0.268817	42	0.451613	1	0.0107527			2	25	119	69	22.9032	171141	112207	123638	18402.3
Scaffold_309	91324	92	0.956522	22	0.23913	3	0.0326087	0	0	17	0.184783	46	0.5	4	0.0434783			6	36	94	38	18.2609	74892	54718	49087	8140.43
Scaffold_3165	91056	92	0.98913	38	0.413043	3	0.0326087	0	0	13	0.141304	37	0.402174	1	0.0108696			5	24	22	29	8.15217	69774	52883	46999	7584.13
Scaffold_339	91829	92	0.98913	21	0.228261	5	0.0543478	0	0	18	0.195652	47	0.51087	1	0.0108696			99	60	54	70	20	107633	54188	67568	11699.2
Scaffold_316	90542	91	1	21	0.230769	4	0.043956	0	0	14	0.153846	52	0.571429	0	0			109	61	83	64	22.8571	89843	44730	56306	9872.86
Scaffold_334	90812	91	0.989011	21	0.230769	5	0.0549451	0	0	19	0.208791	45	0.494505	1	0.010989			1	44	307	39	42.8571	78593	51537	51000	8636.59
Scaffold_285	89368	90	0.977778	29	0.322222	0	0	0	0	16	0.177778	43	0.477778	2	0.0222222			2	27	49	65	15.6667	67671	36322	42664	7519
Scaffold_308	89186	90	0.988889	25	0.277778	5	0.0555556	0	0	16	0.177778	43	0.477778	1	0.0111111			3	20	85	71	19.5556	118721	67259	79663	13191.2
Scaffold_318	89422	90	0.977778	41	0.455556	8	0.0888889	0	0	20	0.222222	19	0.211111	2	0.0222222			10	36	53	19	12	49261	34383	34257	5473.44
Scaffold_330	89743	90	0.966667	22	0.244444	1	0.0111111	0	0	25	0.277778	39	0.433333	3	0.0333333			1	32	2	99	14.7778	115948	63904	75016	12883.1
Scaffold_391	88723	89	0.977528	13	0.146067	1	0.011236	0	0	20	0.224719	53	0.595506	2	0.0224719			1	39	10	99	16.6292	89257	56724	60374	10028.9
Scaffold_303	87458	88	1	42	0.477273	3	0.0340909	0	0	23	0.261364	20	0.227273	0	0			8	33	87	90	23.8636	88624	94591	57420	10070.9
Scaffold_364	87030	88	0.988636	13	0.147727	4	0.0454545	0	0	15	0.170455	55	0.625	1	0.0113636			78	55	149	54	29.3182	71560	36161	43636	8131.82
Scaffold_328	86649	87	0.954023	30	0.344828	3	0.0344828	0	0	21	0.241379	29	0.333333	4	0.045977			4	35	53	20	12.4138	69018	45122	45385	7933.1
Scaffold_297	85438	86	0.94186	27	0.313953	8	0.0930233	0	0	21	0.244186	25	0.290698	5	0.0581395			2	23	25	21	8.02326	63016	34923	41605	7327.44
Scaffold_304	85735	86	0.965116	32	0.372093	2	0.0232558	0	0	37	0.430233	12	0.139535	3	0.0348837			10	36	28	29	10.814	45509	40520	32665	5291.74
Scaffold_321	85840	86	0.976744	23	0.267442	3	0.0348837	0	0	31	0.360465	27	0.313953	2	0.0232558			4	18	1	74	10.814	68452	55855	48206	7959.53
Scaffold_325	85526	86	0.976744	23	0.267442	3	0.0348837	0	0	15	0.174419	43	0.5	2	0.0232558			1	17	46	93	18.1395	65885	33775	42189	7661.05
Scaffold_418	85631	86	1	19	0.22093	3	0.0348837	0	0	19	0.22093	45	0.523256	0	0			91	38	71	75	21.3953	83347	41441	51157	9691.51
Scaffold_311	84163	85	0.988235	29	0.341176	1	0.0117647	0	0	21	0.247059	33	0.388235	1	0.0117647			8	44	1	99	16.9412	68946	45816	50554	8111.29
Scaffold_329	84352	85	0.988235	18	0.211765	1	0.0117647	1	0.0117647	13	0.152941	51	0.6	1	0.0117647			4	36	29	61	14.8235	80427	51631	49922	9462
Scaffold_333	84429	85	1	35	0.411765	0	0	1	0.0117647	13	0.152941	36	0.423529	0	0			2	25	88	119	27.2941	101614	59451	65388	11954.6
Scaffold_349	84661	85	1	12	0.141176	1	0.0117647	0	0	21	0.247059	51	0.6	0	0			91	16	75	98	22.2353	111973	59302	73234	13173.3
Scaffold_298	83820	84	0.964286	14	0.166667	6	0.0714286	0	0	23	0.27381	38	0.452381	3	0.0357143			3	19	44	43	12.619	67357	32538	42980	8018.69
Scaffold_322	83265	84	0.928571	29	0.345238	1	0.0119048	0	0	13	0.154762	35	0.416667	6	0.0714286			3	27	21	61	12.9762	83750	51409	51128	9970.24
Scaffold_352	83923	84	0.97619	29	0.345238	4	0.047619	0	0	12	0.142857	37	0.440476	2	0.0238095			2	34	8	114	18.5714	70428	36035	45713	8384.29
Scaffold_315	82435	83	0.987952	24	0.289157	5	0.060241	0	0	21	0.253012	32	0.385542	1	0.0120482			3	16	42	72	15.6627	67286	38532	49666	8106.75
Scaffold_324	82993	83	0.975904	48	0.578313	2	0.0240964	0	0	14	0.168675	17	0.204819	2	0.0240964			7	40	23	18	9.75904	60411	50044	39707	7278.43
Scaffold_320	81330	82	0.963415	24	0.292683	5	0.0609756	1	0.0121951	30	0.365854	19	0.231707	3	0.0365854			6	39	0	80	14.5122	79107	56739	55337	9647.2
Scaffold_332	81564	82	0.95122	40	0.487805	4	0.0487805	1	0.0121951	24	0.292683	9	0.109756	4	0.0487805			5	16	5	67	10.7317	35846	48455	23772	4371.46
Scaffold_335	81379	82	0.987805	30	0.365854	4	0.0487805	0	0	18	0.219512	29	0.353659	1	0.0121951			5	19	49	53	14.7561	76111	59488	53013	9281.83
Scaffold_341	81558	82	0.963415	43	0.52439	2	0.0243902	0	0	16	0.195122	18	0.219512	3	0.0365854			7	49	28	36	13.7805	67556	51234	45660	8238.54
Scaffold_343	81031	82	0.95122	40	0.487805	3	0.0365854	0	0	26	0.317073	9	0.109756	4	0.0487805			9	24	33	59	14.1463	51129	53202	42142	6235.24
Scaffold_344	81310	82	1	13	0.158537	1	0.0121951	0	0	13	0.158537	55	0.670732	0	0			1	24	47	84	18.9024	68537	36518	42659	8358.17
Scaffold_360	81272	82	0.987805	21	0.256098	3	0.0365854	0	0	18	0.219512	39	0.47561	1	0.0121951			101	51	36	80	20.3659	76172	43551	46826	9289.27
Scaffold_388	81119	82	0.987805	14	0.170732	0	0	0	0	15	0.182927	52	0.634146	1	0.0121951			1	55	72	46	21.0976	66339	36575	44661	8090.12
Scaffold_392	81358	82	0.987805	19	0.231707	5	0.0609756	0	0	21	0.256098	36	0.439024	1	0.0121951			3	32	3	73	13.1707	75269	41942	48162	9179.15
Scaffold_420	81551	82	0.987805	23	0.280488	7	0.0853659	0	0	20	0.243902	31	0.378049	1	0.0121951			9	26	28	14	8.29268	65925	41205	60382	8039.63
Scaffold_351	80313	81	0.925926	24	0.296296	4	0.0493827	0	0	23	0.283951	24	0.296296	6	0.0740741			3	17	0	14	3.82716	58563	29734	46239	7230
Scaffold_385	80813	81	0.975309	27	0.333333	3	0.037037	0	0	16	0.197531	33	0.407407	2	0.0246914			3	80	28	25	16.4198	58119	32223	36474	7175.19
Scaffold_477	80794	81	0.987654	17	0.209877	4	0.0493827	0	0	14	0.17284	45	0.555556	1	0.0123457			2	29	29	100	19.5062	61060	35668	37937	7538.27
Scaffold_313	79603	80	0.9875	24	0.3	1	0.0125	0	0	15	0.1875	39	0.4875	1	0.0125			1	33	48	81	20.25	87933	46972	62199	10991.6
Scaffold_314	79828	80	0.9875	34	0.425	0	0	0	0	16	0.2	29	0.3625	1	0.0125			5	45	24	29	12.25	72111	53157	46362	9013.88
Scaffold_345	79762	80	0.9625	35	0.4375	2	0.025	1	0.0125	12	0.15	27	0.3375	3	0.0375			4	18	35	26	9.875	62539	39571	39141	7817.38
Scaffold_350	79174	80	0.9875	26	0.325	4	0.05	0	0	12	0.15	37	0.4625	1	0.0125			75	30	50	99	22.375	94410	46381	57822	11801.2
Scaffold_355	79132	80	0.9875	18	0.225	6	0.075	0	0	20	0.25	35	0.4375	1	0.0125			3	24	39	49	14	65180	33601	42083	8147.5
Scaffold_357	79005	80	0.975	34	0.425	3	0.0375	1	0.0125	16	0.2	24	0.3	2	0.025			5	75	39	126	30	64880	46964	43190	8110
Scaffold_359	79014	80	0.9875	19	0.2375	0	0	0	0	9	0.1125	51	0.6375	1	0.0125			1	28	38	42	13.5	75135	40749	50677	9391.88
Scaffold_372	79024	80	0.9875	21	0.2625	3	0.0375	0	0	18	0.225	37	0.4625	1	0.0125			2	38	1	68	13.375	94504	49141	60166	11813
Scaffold_412	79554	80	0.9875	21	0.2625	2	0.025	0	0	7	0.0875	49	0.6125	1	0.0125			1	42	64	51	19.625	72146	39676	47928	9018.25
Scaffold_326	78936	79	0.974684	44	0.556962	7	0.0886076	1	0.0126582	19	0.240506	6	0.0759494	2	0.0253165			7	21	65	19	13.2911	65519	71915	42334	8293.54
Scaffold_342	78793	79	1	30	0.379747	1	0.0126582	1	0.0126582	25	0.316456	22	0.278481	0	0			6	38	51	107	24.8101	61206	37829	48953	7747.59
Scaffold_358	78866	79	0.962025	29	0.367089	4	0.0506329	0	0	12	0.151899	31	0.392405	3	0.0379747			1	34	49	122	25.9494	68516	36618	49854	8672.91
Scaffold_3166	77954	78	1	21	0.269231	2	0.025641	0	0	14	0.179487	41	0.525641	0	0			82	18	5	42	8.33333	36821	18081	22148	4720.64
Scaffold_410	77776	78	0.974359	20	0.25641	3	0.0384615	0	0	14	0.179487	39	0.5	2	0.025641			88	23	9	134	21.2821	86317	44262	56517	11066.3
Scaffold_338	76340	77	0.974026	34	0.441558	1	0.012987	0	0	18	0.233766	22	0.285714	2	0.025974			4	42	23	91	20.2597	85151	51209	59712	11058.6
Scaffold_375	76738	77	1	27	0.350649	0	0	0	0	17	0.220779	33	0.428571	0	0			6	28	110	79	28.1818	89324	54108	65050	11600.5
Scaffold_387	76531	77	0.987013	12	0.155844	1	0.012987	0	0	13	0.168831	50	0.649351	1	0.012987			87	21	31	56	14.026	72229	35144	43231	9380.39
Scaffold_407	76074	77	0.987013	14	0.181818	7	0.0909091	0	0	18	0.233766	37	0.480519	1	0.012987			86	13	34	68	14.9351	59503	33710	39883	7727.66
Scaffold_432	76444	77	1	15	0.194805	2	0.025974	0	0	14	0.181818	46	0.597403	0	0			70	45	0	32	10	65556	32798	39676	8513.77
Scaffold_434	76331	77	1	11	0.142857	0	0	0	0	15	0.194805	51	0.662338	0	0			65	26	96	81	26.3636	52538	26676	33748	6823.12
Scaffold_356	75322	76	0.986842	23	0.302632	3	0.0394737	0	0	21	0.276316	28	0.368421	1	0.0131579			4	53	12	16	10.6579	40056	31493	33409	5270.53
Scaffold_361	75123	76	0.973684	27	0.355263	3	0.0394737	0	0	18	0.236842	26	0.342105	2	0.0263158			7	21	3	18	5.52632	32368	26168	31348	4258.95
Scaffold_373	75275	76	0.986842	27	0.355263	4	0.0526316	0	0	18	0.236842	26	0.342105	1	0.0131579			1	17	1	46	8.42105	61801	34906	48089	8131.71
Scaffold_348	74794	75	0.973333	28	0.373333	4	0.0533333	0	0	16	0.213333	25	0.333333	2	0.0266667			2	32	26	54	14.9333	63524	33074	36369	8469.87
Scaffold_369	74667	75	0.973333	29	0.386667	2	0.0266667	0	0	20	0.266667	22	0.293333	2	0.0266667			5	30	9	12	6.8	43335	24299	25919	5778
Scaffold_381	74347	75	1	14	0.186667	0	0	1	0.0133333	20	0.266667	40	0.533333	0	0			79	39	32	104	23.3333	81176	40781	52214	10823.5
Scaffold_396	74081	75	0.933333	19	0.253333	4	0.0533333	0	0	19	0.253333	28	0.373333	5	0.0666667			5	19	29	42	12	62917	44394	52667	8388.93
Scaffold_409	74615	75	0.973333	15	0.2	2	0.0266667	1	0.0133333	13	0.173333	42	0.56	2	0.0266667			65	35	46	42	16.4	75535	37490	47516	10071.3
Scaffold_384	73082	74	0.986486	11	0.148649	0	0	0	0	15	0.202703	47	0.635135	1	0.0135135			76	32	64	47	19.3243	71685	35930	44397	9687.16
Scaffold_435	73312	74	0.972973	14	0.189189	5	0.0675676	0	0	16	0.216216	37	0.5	2	0.027027			2	13	13	12	5.13514	29575	17964	20459	3996.62
Scaffold_458	73513	74	1	9	0.121622	2	0.027027	0	0	15	0.202703	48	0.648649	0	0			63	47	99	81	30.6757	66989	33265	41774	9052.57
Scaffold_365	72255	73	1	24	0.328767	0	0	0	0	13	0.178082	36	0.493151	0	0			71	23	112	91	30.9589	91965	46076	57696	12597.9
Scaffold_368	72194	73	0.972603	26	0.356164	6	0.0821918	1	0.0136986	9	0.123288	29	0.39726	2	0.0273973			3	14	30	29	10	52923	31814	38111	7249.73
Scaffold_367	71740	72	0.972222	23	0.319444	2	0.0277778	0	0	17	0.236111	28	0.388889	2	0.0277778			4	15	55	29	13.75	58237	36711	38556	8088.47
Scaffold_377	71016	72	0.972222	8	0.111111	2	0.0277778	1	0.0138889	14	0.194444	45	0.625	2	0.0277778			70	33	90	66	26.25	68615	33013	41281	9529.86
Scaffold_380	71887	72	0.986111	27	0.375	2	0.0277778	0	0	17	0.236111	25	0.347222	1	0.0138889			2	51	16	60	17.6389	65263	52239	40724	9064.31
Scaffold_401	71442	72	0.972222	24	0.333333	2	0.0277778	1	0.0138889	10	0.138889	33	0.458333	2	0.0277778			70	47	0	46	12.9167	74540	35786	46592	10352.8
Scaffold_406	71753	72	0.972222	28	0.388889	3	0.0416667	0	0	17	0.236111	22	0.305556	2	0.0277778			5	26	65	25	16.1111	62244	65054	39476	8645
Scaffold_421	71186	72	0.972222	16	0.222222	3	0.0416667	0	0	11	0.152778	40	0.555556	2	0.0277778			53	20	31	55	14.7222	56813	28898	36009	7890.69
Scaffold_422	71868	72	1	15	0.208333	1	0.0138889	0	0	11	0.152778	45	0.625	0	0			71	70	52	108	31.9444	66085	33569	42539	9178.47
Scaffold_370	70506	71	1	20	0.28169	3	0.0422535	0	0	15	0.211268	33	0.464789	0	0			2	29	0	115	20.2817	52741	38025	33203	7428.31
Scaffold_374	70887	71	0.957746	32	0.450704	3	0.0422535	2	0.028169	16	0.225352	15	0.211268	3	0.0422535			3	21	49	13	11.6901	43710	22578	27953	6156.34
Scaffold_382	70584	71	1	18	0.253521	1	0.0140845	0	0	11	0.15493	41	0.577465	0	0			50	31	32	37	14.0845	61402	33466	39846	8648.17
Scaffold_403	70617	71	0.957746	27	0.380282	2	0.028169	1	0.0140845	18	0.253521	20	0.28169	3	0.0422535			8	13	0	27	5.6338	52632	40652	54261	7412.96
Scaffold_405	70015	71	0.957746	22	0.309859	3	0.0422535	0	0	9	0.126761	34	0.478873	3	0.0422535			4	25	56	46	17.8873	80467	49956	55468	11333.4
Scaffold_437	70260	71	1	22	0.309859	1	0.0140845	0	0	15	0.211268	33	0.464789	0	0			88	14	10	7	4.3662	34277	18545	20574	4827.75
Scaffold_441	70428	71	0.957746	21	0.295775	1	0.0140845	0	0	13	0.183099	33	0.464789	3	0.0422535			2	10	0	45	7.74648	54945	26380	32167	7738.73
Scaffold_451	70504	71	1	27	0.380282	4	0.056338	0	0	17	0.239437	23	0.323944	0	0			1	58	94	90	34.0845	98602	62472	63906	13887.6
Scaffold_530	70265	71	0.985915	10	0.140845	2	0.028169	0	0	9	0.126761	49	0.690141	1	0.0140845			44	15	3	82	14.0845	81326	45453	55157	11454.4
Scaffold_383	69950	70	1	36	0.514286	4	0.0571429	1	0.0142857	20	0.285714	9	0.128571	0	0			3	31	17	32	11.4286	94522	61597	71237	13503.1
Scaffold_386	69389	70	0.928571	22	0.314286	0	0	0	0	15	0.214286	28	0.4	5	0.0714286			3	80	65	125	38.5714	68170	39785	45185	9738.57
Scaffold_402	69218	70	0.971429	21	0.3	4	0.0571429	1	0.0142857	15	0.214286	27	0.385714	2	0.0285714			83	18	1	31	7.14286	49925	24629	29723	7132.14
Scaffold_417	69607	70	0.985714	15	0.214286	1	0.0142857	0	0	15	0.214286	38	0.542857	1	0.0142857			71	20	59	44	17.5714	66329	35159	40362	9475.57
Scaffold_443	69982	70	0.957143	20	0.285714	1	0.0142857	0	0	8	0.114286	38	0.542857	3	0.0428571			60	39	0	37	10.8571	93389	50304	60748	13341.3
Scaffold_476	69789	70	0.971429	19	0.271429	2	0.0285714	0	0	25	0.357143	22	0.314286	2	0.0285714			3	17	32	40	12.7143	60672	35419	42523	8667.43
Scaffold_490	69054	70	0.985714	10	0.142857	1	0.0142857	0	0	18	0.257143	40	0.571429	1	0.0142857			28	29	15	135	25.5714	189557	143412	147932	27079.6
Scaffold_555	69444	70	1	4	0.0571429	2	0.0285714	1	0.0142857	7	0.1	56	0.8	0	0			40	21	31	43	13.5714	54944	28004	35754	7849.14
Scaffold_576	69271	70	1	14	0.2	0	0	0	0	10	0.142857	46	0.657143	0	0			36	18	46	29	13.2857	55704	28777	37257	7957.71
Scaffold_395	68869	69	0.942029	27	0.391304	4	0.057971	1	0.0144928	11	0.15942	22	0.318841	4	0.057971			4	31	52	34	16.9565	64588	33541	51614	9360.58
Scaffold_416	68307	69	0.985507	14	0.202899	4	0.057971	0	0	10	0.144928	40	0.57971	1	0.0144928			64	22	26	82	18.8406	73790	45165	47653	10694.2
Scaffold_460	68602	69	1	12	0.173913	1	0.0144928	0	0	13	0.188406	43	0.623188	0	0			52	25	21	74	17.3913	77314	41336	51146	11204.9
Scaffold_366	67103	68	0.985294	23	0.338235	2	0.0294118	0	0	16	0.235294	26	0.382353	1	0.0147059			2	53	103	65	32.5	81985	49551	51565	12056.6
Scaffold_397	67163	68	0.970588	25	0.367647	2	0.0294118	0	0	18	0.264706	21	0.308824	2	0.0294118			3	9	24	48	11.9118	40498	43024	23499	5955.59
Scaffold_404	67595	68	1	19	0.279412	1	0.0147059	0	0	10	0.147059	38	0.558824	0	0			71	23	30	61	16.7647	50647	26486	34983	7448.09
Scaffold_482	67607	68	0.941176	17	0.25	3	0.0441176	1	0.0147059	15	0.220588	28	0.411765	4	0.0588235			4	15	33	28	11.1765	66942	35205	47789	9844.41
Scaffold_376	66913	67	0.985075	14	0.208955	0	0	0	0	22	0.328358	30	0.447761	1	0.0149254			2	38	59	61	23.5821	61565	33030	41384	9188.81
Scaffold_378	66027	67	0.985075	20	0.298507	2	0.0298507	0	0	9	0.134328	35	0.522388	1	0.0149254			2	17	20	32	10.2985	43534	31944	27447	6497.61
Scaffold_398	66687	67	0.985075	22	0.328358	4	0.0597015	1	0.0149254	10	0.149254	29	0.432836	1	0.0149254			3	20	33	52	15.6716	56829	38505	39568	8481.94
Scaffold_415	66279	67	0.940299	15	0.223881	4	0.0597015	0	0	18	0.268657	26	0.38806	4	0.0597015			4	17	27	21	9.70149	58454	32573	55898	8724.48
Scaffold_419	66489	67	1	27	0.402985	2	0.0298507	0	0	16	0.238806	22	0.328358	0	0			69	24	43	33	14.9254	61225	31276	39473	9138.06
Scaffold_465	66693	67	1	8	0.119403	3	0.0447761	0	0	11	0.164179	45	0.671642	0	0			54	13	24	32	10.2985	48594	23807	29775	7252.84
Scaffold_466	66097	67	1	21	0.313433	0	0	0	0	10	0.149254	36	0.537313	0	0			4	41	60	33	20	70502	50829	47909	10522.7
Scaffold_470	66694	67	0.985075	18	0.268657	3	0.0447761	0	0	9	0.134328	36	0.537313	1	0.0149254			58	41	6	52	14.7761	38479	19686	23062	5743.13
Scaffold_596	66277	67	1	9	0.134328	3	0.0447761	0	0	12	0.179104	43	0.641791	0	0			57	22	44	51	17.4627	67623	36002	44066	10093
Scaffold_414	65863	66	0.984848	13	0.19697	2	0.030303	0	0	8	0.121212	42	0.636364	1	0.0151515			46	29	34	62	18.9394	79452	42752	52179	12038.2
Scaffold_427	65509	66	0.984848	31	0.469697	3	0.0454545	1	0.0151515	10	0.151515	20	0.30303	1	0.0151515			4	56	82	50	28.4848	55211	36620	34082	8365.3
Scaffold_431	65803	66	0.984848	18	0.272727	0	0	0	0	6	0.0909091	41	0.621212	1	0.0151515			1	22	6	142	25.7576	78176	40286	50744	11844.8
Scaffold_455	65594	66	1	12	0.181818	2	0.030303	0	0	15	0.227273	37	0.560606	0	0			1	41	27	54	18.4848	41760	27514	25110	6327.27
Scaffold_472	65122	66	0.984848	12	0.181818	0	0	0	0	12	0.181818	41	0.621212	1	0.0151515			1	48	18	133	30.1515	61090	33320	37618	9256.06
Scaffold_492	65483	66	1	7	0.106061	0	0	0	0	9	0.136364	50	0.757576	0	0			53	16	52	64	20	46924	23089	29191	7109.7
Scaffold_516	65418	66	1	12	0.181818	3	0.0454545	0	0	10	0.151515	41	0.621212	0	0			56	16	23	42	12.2727	53916	27445	33542	8169.09
Scaffold_532	65376	66	1	3	0.0454545	1	0.0151515	0	0	10	0.151515	52	0.787879	0	0			42	9	0	16	3.78788	47660	24621	30423	7221.21
Scaffold_635	65541	66	0.984848	14	0.212121	2	0.030303	1	0.0151515	10	0.151515	38	0.575758	1	0.0151515			56	28	43	117	28.4848	67586	36033	44573	10240.3
Scaffold_413	64939	65	0.984615	10	0.153846	5	0.0769231	0	0	11	0.169231	38	0.584615	1	0.0153846			66	39	27	49	17.6923	84452	44111	54482	12992.6
Scaffold_430	64669	65	0.984615	28	0.430769	2	0.0307692	0	0	20	0.307692	14	0.215385	1	0.0153846			3	42	1	37	12.3077	66508	60593	43446	10232
Scaffold_439	64447	65	0.953846	30	0.461538	2	0.0307692	0	0	11	0.169231	19	0.292308	3	0.0461538			6	29	24	29	12.6154	49287	30763	36336	7582.62
Scaffold_446	64583	65	1	17	0.261538	3	0.0461538	0	0	13	0.2	32	0.492308	0	0			3	71	44	53	25.8462	59546	38070	36383	9160.92
Scaffold_447	64494	65	0.984615	25	0.384615	0	0	0	0	13	0.2	26	0.4	1	0.0153846			6	16	6	15	5.69231	53835	40651	35909	8282.31
Scaffold_449	64853	65	0.984615	11	0.169231	1	0.0153846	0	0	10	0.153846	42	0.646154	1	0.0153846			70	21	40	58	18.3077	69700	33661	42150	10723.1
Scaffold_456	64752	65	0.984615	6	0.0923077	2	0.0307692	0	0	20	0.307692	36	0.553846	1	0.0153846			73	33	83	107	34.3077	73221	35053	44161	11264.8
Scaffold_457	64798	65	0.969231	14	0.215385	0	0	2	0.0307692	13	0.2	34	0.523077	2	0.0307692			63	57	42	63	24.9231	69279	35303	42844	10658.3
Scaffold_461	64395	65	0.984615	15	0.230769	2	0.0307692	0	0	9	0.138462	38	0.584615	1	0.0153846			1	30	35	12	11.8462	54808	27395	33587	8432
Scaffold_473	64814	65	0.984615	15	0.230769	3	0.0461538	0	0	10	0.153846	36	0.553846	1	0.0153846			1	30	42	53	19.2308	86817	53225	56332	13356.5
Scaffold_487	64403	65	0.938462	25	0.384615	6	0.0923077	0	0	11	0.169231	19	0.292308	4	0.0615385			4	34	49	41	19.0769	55073	49468	34825	8472.77
Scaffold_537	64452	65	0.984615	18	0.276923	3	0.0461538	0	0	9	0.138462	34	0.523077	1	0.0153846			4	53	30	17	15.3846	39154	20169	23816	6023.69
Scaffold_393	63888	64	0.953125	15	0.234375	8	0.125	0	0	14	0.21875	24	0.375	3	0.046875			1	12	8	16	5.625	39146	19936	25304	6116.56
Scaffold_424	63782	64	1	33	0.515625	6	0.09375	0	0	20	0.3125	5	0.078125	0	0			6	10	37	51	15.3125	37240	30693	27161	5818.75
Scaffold_428	63625	64	0.984375	30	0.46875	4	0.0625	0	0	13	0.203125	16	0.25	1	0.015625			3	15	39	35	13.9062	43440	24757	30671	6787.5
Scaffold_433	63401	64	0.96875	25	0.390625	2	0.03125	0	0	15	0.234375	20	0.3125	2	0.03125			2	19	3	44	10.3125	46398	29145	27960	7249.69
Scaffold_442	63382	64	1	16	0.25	0	0	0	0	12	0.1875	36	0.5625	0	0			77	30	1	36	10.4688	75933	39620	47821	11864.5
Scaffold_445	63267	64	1	21	0.328125	2	0.03125	1	0.015625	17	0.265625	23	0.359375	0	0			1	28	59	53	21.875	64445	37548	41143	10069.5
Scaffold_448	63960	64	0.984375	12	0.1875	0	0	0	0	11	0.171875	40	0.625	1	0.015625			2	27	22	48	15.1562	50698	42934	33729	7921.56
Scaffold_450	63684	64	1	16	0.25	1	0.015625	0	0	15	0.234375	32	0.5	0	0			48	21	61	80	25.3125	40769	21071	23162	6370.16
Scaffold_453	63983	64	1	3	0.046875	1	0.015625	0	0	13	0.203125	47	0.734375	0	0			1	20	23	45	13.75	56411	36947	36779	8814.22
Scaffold_475	63093	64	0.96875	8	0.125	3	0.046875	1	0.015625	17	0.265625	33	0.515625	2	0.03125			1	47	131	71	38.9062	70464	43768	41351	11010
Scaffold_480	63387	64	1	13	0.203125	2	0.03125	0	0	14	0.21875	35	0.546875	0	0			2	36	32	34	15.9375	39611	22208	24922	6189.22
Scaffold_545	63011	64	1	11	0.171875	1	0.015625	0	0	11	0.171875	41	0.640625	0	0			47	22	40	111	27.0312	66765	32845	41346	10432
Scaffold_400	62084	63	1	20	0.31746	1	0.015873	0	0	13	0.206349	29	0.460317	0	0			60	35	1	158	30.7937	60916	30632	38013	9669.21
Scaffold_444	62824	63	1	31	0.492063	1	0.015873	1	0.015873	11	0.174603	19	0.301587	0	0			51	10	18	16	6.98413	47988	40189	29784	7617.14
Scaffold_463	62203	63	0.984127	14	0.222222	0	0	0	0	15	0.238095	33	0.52381	1	0.015873			46	14	31	104	23.6508	61275	34220	54454	9726.19
Scaffold_485	62856	63	0.968254	15	0.238095	0	0	0	0	10	0.15873	36	0.571429	2	0.031746			1	19	38	129	29.5238	46856	22719	28709	7437.46
Scaffold_501	62987	63	1	14	0.222222	2	0.031746	0	0	10	0.15873	37	0.587302	0	0			60	26	55	22	16.3492	39360	19937	23470	6247.62
Scaffold_506	62630	63	0.984127	8	0.126984	0	0	0	0	14	0.222222	40	0.634921	1	0.015873			64	32	48	54	21.2698	98789	58238	68723	15680.8
Scaffold_608	62733	63	1	21	0.333333	2	0.031746	0	0	6	0.0952381	34	0.539683	0	0			1	21	34	52	16.9841	57385	34241	36491	9108.73
Scaffold_429	61567	62	0.983871	8	0.129032	0	0	0	0	8	0.129032	45	0.725806	1	0.016129			53	15	38	43	15.4839	42661	21981	28391	6880.81
Scaffold_440	61603	62	0.951613	25	0.403226	0	0	0	0	12	0.193548	22	0.354839	3	0.0483871			1	17	0	52	11.129	52885	32437	33955	8529.84
Scaffold_452	61302	62	1	26	0.419355	1	0.016129	0	0	14	0.225806	21	0.33871	0	0			7	56	40	82	28.7097	67779	52606	46534	10932.1
Scaffold_454	61048	62	1	23	0.370968	4	0.0645161	0	0	18	0.290323	17	0.274194	0	0			4	33	27	14	11.9355	39154	34059	25214	6315.16
Scaffold_464	61635	62	1	16	0.258065	1	0.016129	1	0.016129	12	0.193548	32	0.516129	0	0			3	29	12	24	10.4839	59157	47293	36612	9541.45
Scaffold_499	61425	62	0.983871	28	0.451613	3	0.0483871	0	0	15	0.241935	15	0.241935	1	0.016129			3	14	22	26	10	42582	36996	26559	6868.06
Scaffold_504	61495	62	0.983871	10	0.16129	1	0.016129	0	0	15	0.241935	35	0.564516	1	0.016129			2	29	25	23	12.4194	53416	27088	33682	8615.48
Scaffold_515	61788	62	0.983871	10	0.16129	2	0.0322581	0	0	13	0.209677	36	0.580645	1	0.016129			2	25	34	45	16.7742	52076	27618	34329	8399.35
Scaffold_519	61251	62	0.983871	19	0.306452	3	0.0483871	0	0	17	0.274194	22	0.354839	1	0.016129			67	23	38	21	13.2258	59720	32840	39356	9632.26
Scaffold_534	61077	62	1	22	0.354839	1	0.016129	0	0	9	0.145161	30	0.483871	0	0			1	47	8	41	15.4839	68617	40758	46383	11067.3
Scaffold_1208	60149	61	0.983607	15	0.245902	4	0.0655738	0	0	10	0.163934	31	0.508197	1	0.0163934				20	43	25	14.4262	56087	27731	33075	9194.59
Scaffold_459	60451	61	0.983607	33	0.540984	1	0.0163934	0	0	17	0.278689	9	0.147541	1	0.0163934			9	5	29	15	8.03279	39999	52628	35256	6557.21
Scaffold_462	60246	61	0.967213	27	0.442623	5	0.0819672	0	0	18	0.295082	9	0.147541	2	0.0327869			6	16	6	26	7.86885	48746	47240	29986	7991.15
Scaffold_468	60975	61	0.967213	18	0.295082	3	0.0491803	0	0	19	0.311475	19	0.311475	2	0.0327869			5	18	21	3	6.88525	38124	18661	23704	6249.84
Scaffold_488	60949	61	0.934426	15	0.245902	2	0.0327869	0	0	18	0.295082	22	0.360656	4	0.0655738			2	12	8	12	5.2459	31901	15910	18512	5229.67
Scaffold_489	60858	61	0.983607	12	0.196721	1	0.0163934	0	0	13	0.213115	34	0.557377	1	0.0163934			1	19	32	62	18.5246	49625	30225	31068	8135.25
Scaffold_522	60685	61	0.983607	15	0.245902	1	0.0163934	0	0	6	0.0983607	38	0.622951	1	0.0163934			59	38	98	24	26.2295	74175	38192	49116	12159.8
Scaffold_526	60160	61	1	16	0.262295	4	0.0655738	1	0.0163934	10	0.163934	30	0.491803	0	0			48	22	53	30	17.2131	71247	41022	47779	11679.8
Scaffold_558	60236	61	1	16	0.262295	1	0.0163934	0	0	19	0.311475	25	0.409836	0	0			1	18	27	28	11.9672	50850	33168	33504	8336.07
Scaffold_617	60252	61	0.983607	21	0.344262	1	0.0163934	0	0	15	0.245902	23	0.377049	1	0.0163934			3	30	34	97	26.3934	74649	50802	44992	12237.5
Scaffold_399	59568	60	0.933333	21	0.35	4	0.0666667	0	0	13	0.216667	18	0.3	4	0.0666667			79	24	19	28	11.8333	50717	42726	32215	8452.83
Scaffold_467	59232	60	0.95	24	0.4	4	0.0666667	2	0.0333333	17	0.283333	10	0.166667	3	0.05			2	14	55	24	15.5	54943	26221	32957	9157.17
Scaffold_469	59273	60	1	12	0.2	0	0	0	0	9	0.15	39	0.65	0	0			64	27	37	50	19	80937	43708	54012	13489.5
Scaffold_471	59625	60	1	30	0.5	2	0.0333333	1	0.0166667	10	0.166667	17	0.283333	0	0			1	55	0	68	20.5	64429	40985	39210	10738.2
Scaffold_474	59027	60	1	26	0.433333	1	0.0166667	0	0	14	0.233333	19	0.316667	0	0			3	59	70	36	27.5	71497	54970	46419	11916.2
Scaffold_481	59613	60	0.95	16	0.266667	1	0.0166667	0	0	14	0.233333	26	0.433333	3	0.05			3	20	52	43	19.1667	57833	34846	38177	9638.83
Scaffold_500	59676	60	0.983333	15	0.25	3	0.05	0	0	9	0.15	32	0.533333	1	0.0166667			1	23	70	48	23.5	51771	26660	32154	8628.5
Scaffold_503	59191	60	0.983333	17	0.283333	2	0.0333333	0	0	18	0.3	22	0.366667	1	0.0166667			5	9	13	11	5.5	57825	37722	63663	9637.5
Scaffold_510	59908	60	0.966667	11	0.183333	2	0.0333333	0	0	13	0.216667	32	0.533333	2	0.0333333			58	34	136	78	41.3333	69186	35549	44883	11531
Scaffold_514	59825	60	0.983333	11	0.183333	3	0.05	0	0	16	0.266667	29	0.483333	1	0.0166667			70	23	32	42	16.1667	61944	39411	41217	10324
Scaffold_517	59502	60	0.983333	10	0.166667	1	0.0166667	0	0	9	0.15	39	0.65	1	0.0166667			57	30	18	19	11.1667	50384	26739	31345	8397.33
Scaffold_528	59223	60	0.983333	12	0.2	2	0.0333333	0	0	19	0.316667	26	0.433333	1	0.0166667			4	34	28	17	13.1667	68589	53753	44414	11431.5
Scaffold_565	59658	60	1	13	0.216667	0	0	0	0	10	0.166667	37	0.616667	0	0			56	14	14	21	8.16667	34371	16906	18759	5728.5
Scaffold_408	58354	59	1	10	0.169492	1	0.0169492	1	0.0169492	13	0.220339	34	0.576271	0	0			65	32	87	46	27.9661	74528	38508	49093	12631.9
Scaffold_425	58091	59	0.949153	23	0.389831	2	0.0338983	0	0	17	0.288136	14	0.237288	3	0.0508475			84	15	12	25	8.81356	51310	26132	36541	8696.61
Scaffold_479	58262	59	0.932203	18	0.305085	6	0.101695	0	0	13	0.220339	18	0.305085	4	0.0677966			3	84	23	18	21.1864	43080	29542	26127	7301.69
Scaffold_495	58664	59	1	17	0.288136	0	0	0	0	16	0.271186	26	0.440678	0	0			80	20	27	57	17.6271	71533	37069	44650	12124.2
Scaffold_497	58979	59	0.966102	17	0.288136	3	0.0508475	1	0.0169492	13	0.220339	23	0.389831	2	0.0338983			1	8	12	5	4.23729	37359	21877	24868	6332.03
Scaffold_511	58259	59	0.949153	21	0.355932	1	0.0169492	0	0	13	0.220339	21	0.355932	3	0.0508475			1	8	20	16	7.45763	42422	23152	28043	7190.17
Scaffold_551	58440	59	1	11	0.186441	3	0.0508475	0	0	9	0.152542	36	0.610169	0	0			73	17	28	29	12.5424	60653	33271	42279	10280.2
Scaffold_582	58932	59	1	17	0.288136	0	0	1	0.0169492	12	0.20339	29	0.491525	0	0			51	25	39	41	17.7966	158094	106738	119996	26795.6
Scaffold_484	57115	58	1	14	0.241379	2	0.0344828	0	0	11	0.189655	31	0.534483	0	0			4	30	44	38	19.3103	36280	21330	22022	6255.17
Scaffold_486	57773	58	0.965517	20	0.344828	1	0.0172414	0	0	9	0.155172	26	0.448276	2	0.0344828			1	32	43	32	18.4483	56916	27839	33550	9813.1
Scaffold_494	57873	58	0.982759	26	0.448276	3	0.0517241	0	0	11	0.189655	17	0.293103	1	0.0172414			2	36	2	13	8.7931	44545	24394	29067	7680.17
Scaffold_512	57292	58	0.982759	16	0.275862	3	0.0517241	0	0	16	0.275862	22	0.37931	1	0.0172414			3	24	173	24	38.1034	57029	30517	41023	9832.59
Scaffold_536	57765	58	1	11	0.189655	1	0.0172414	0	0	9	0.155172	37	0.637931	0	0			55	17	49	37	17.7586	77555	40009	49319	13371.6
Scaffold_543	57054	58	0.982759	23	0.396552	2	0.0344828	0	0	13	0.224138	19	0.327586	1	0.0172414			6	6	16	38	10.3448	50551	32486	34174	8715.69
Scaffold_612	57345	58	0.982759	13	0.224138	0	0	1	0.0172414	8	0.137931	35	0.603448	1	0.0172414			41	14	0	2	2.75862	36796	18300	20852	6344.14
Scaffold_650	57197	58	1	4	0.0689655	1	0.0172414	0	0	17	0.293103	36	0.62069	0	0			68	21	2	191	36.8966	61942	32019	39367	10679.7
Scaffold_478	56901	57	1	4	0.0701754	1	0.0175439	0	0	21	0.368421	31	0.54386	0	0			75	17	59	62	24.2105	65455	32013	40675	11483.3
Scaffold_483	56516	57	0.912281	26	0.45614	4	0.0701754	0	0	12	0.210526	10	0.175439	5	0.0877193			6	6	30	13	8.59649	41648	30234	63812	7306.67
Scaffold_491	56919	57	1	32	0.561404	2	0.0350877	0	0	12	0.210526	11	0.192982	0	0			8	12	65	29	18.5965	69724	65894	47232	12232.3
Scaffold_496	56380	57	0.964912	23	0.403509	3	0.0526316	0	0	17	0.298246	12	0.210526	2	0.0350877			5	56	9	7	12.6316	33217	22941	29354	5827.54
Scaffold_502	56484	57	1	10	0.175439	1	0.0175439	0	0	5	0.0877193	41	0.719298	0	0			42	29	21	45	16.6667	63182	32451	40711	11084.6
Scaffold_518	56975	57	1	13	0.22807	1	0.0175439	0	0	8	0.140351	35	0.614035	0	0			2	35	61	40	23.8596	70665	36786	45326	12397.4
Scaffold_521	56713	57	1	13	0.22807	1	0.0175439	0	0	8	0.140351	35	0.614035	0	0			79	21	48	28	17.0175	56613	28719	36359	9932.11
Scaffold_525	56035	57	0.982456	14	0.245614	1	0.0175439	0	0	6	0.105263	35	0.614035	1	0.0175439			59	27	39	61	22.2807	65348	32080	40480	11464.6
Scaffold_542	56139	57	1	10	0.175439	0	0	0	0	12	0.210526	35	0.614035	0	0			55	17	5	36	10.1754	49567	26829	30713	8695.96
Scaffold_548	56303	57	1	11	0.192982	1	0.0175439	0	0	8	0.140351	37	0.649123	0	0			38	20	27	21	11.9298	46514	22952	29037	8160.35
Scaffold_549	56888	57	1	17	0.298246	0	0	0	0	12	0.210526	28	0.491228	0	0			4	30	55	20	18.4211	57774	44142	34338	10135.8
Scaffold_563	56186	57	1	20	0.350877	5	0.0877193	0	0	8	0.140351	24	0.421053	0	0			1	8	0	8	2.80702	41066	20544	24585	7204.56
Scaffold_603	56233	57	1	8	0.140351	1	0.0175439	0	0	14	0.245614	34	0.596491	0	0			72	30	2	23	9.64912	56887	28072	34666	9980.18
Scaffold_438	55630	56	1	8	0.142857	2	0.0357143	0	0	16	0.285714	30	0.535714	0	0			51	35	85	89	37.3214	63740	32106	40633	11382.1
Scaffold_505	55384	56	1	20	0.357143	2	0.0357143	0	0	13	0.232143	21	0.375	0	0			1	18	20	8	8.21429	36215	19856	22547	6466.96
Scaffold_508	55419	56	0.928571	18	0.321429	1	0.0178571	0	0	9	0.160714	24	0.428571	4	0.0714286			42	17	37	46	17.8571	80504	44958	54271	14375.7
Scaffold_513	55227	56	0.982143	16	0.285714	4	0.0714286	0	0	11	0.196429	24	0.428571	1	0.0178571			2	6	60	26	16.4286	43996	29895	29798	7856.43
Scaffold_533	55752	56	0.964286	9	0.160714	1	0.0178571	1	0.0178571	10	0.178571	33	0.589286	2	0.0357143			63	29	41	38	19.2857	68400	35515	44121	12214.3
Scaffold_559	55043	56	1	11	0.196429	1	0.0178571	0	0	6	0.107143	38	0.678571	0	0			37	20	53	23	17.1429	47015	23204	29531	8395.54
Scaffold_566	55077	56	0.982143	12	0.214286	1	0.0178571	0	0	8	0.142857	34	0.607143	1	0.0178571			1	45	30	42	20.8929	66021	34453	47758	11789.5
Scaffold_580	55731	56	1	21	0.375	1	0.0178571	0	0	11	0.196429	23	0.410714	0	0			2	25	38	102	29.4643	59061	37394	36267	10546.6
Scaffold_662	55069	56	0.928571	4	0.0714286	4	0.0714286	0	0	22	0.392857	22	0.392857	4	0.0714286			100	13	14	5	5.71429	35425	16722	19909	6325.89
Scaffold_436	54505	55	0.981818	13	0.236364	0	0	0	0	15	0.272727	26	0.472727	1	0.0181818			77	46	42	74	29.4545	62812	35251	42131	11420.4
Scaffold_509	54968	55	0.981818	23	0.418182	0	0	1	0.0181818	14	0.254545	16	0.290909	1	0.0181818			3	22	34	26	14.9091	59221	29243	39378	10767.5
Scaffold_523	54194	55	0.945455	15	0.272727	3	0.0545455	0	0	9	0.163636	25	0.454545	3	0.0545455			70	10	69	12	16.5455	46839	23282	30638	8516.18
Scaffold_529	54173	55	0.963636	13	0.236364	3	0.0545455	1	0.0181818	9	0.163636	27	0.490909	2	0.0363636			4	16	38	45	18	50235	39256	33643	9133.64
Scaffold_557	54291	55	0.963636	17	0.309091	7	0.127273	0	0	11	0.2	18	0.327273	2	0.0363636			1	19	26	22	12.1818	53073	29865	32541	9649.64
Scaffold_637	54759	55	0.981818	5	0.0909091	2	0.0363636	0	0	6	0.109091	41	0.745455	1	0.0181818			43	32	40	28	18.1818	52894	26899	33999	9617.09
Scaffold_493	53847	54	0.962963	13	0.240741	0	0	0	0	8	0.148148	31	0.574074	2	0.037037			57	9	48	15	13.3333	63545	36405	43193	11767.6
Scaffold_520	53348	54	0.981481	14	0.259259	1	0.0185185	0	0	13	0.240741	25	0.462963	1	0.0185185			95	11	109	89	38.7037	67476	32762	40634	12495.6
Scaffold_527	53087	54	0.944444	13	0.240741	2	0.037037	0	0	10	0.185185	26	0.481481	3	0.0555556			57	39	68	51	29.2593	60603	29884	37751	11222.8
Scaffold_539	53596	54	0.962963	27	0.5	3	0.0555556	0	0	11	0.203704	11	0.203704	2	0.037037			3	14	52	20	15.9259	47980	51771	30840	8885.19
Scaffold_547	53277	54	1	19	0.351852	1	0.0185185	0	0	10	0.185185	24	0.444444	0	0			3	18	32	15	12.037	61726	38225	37948	11430.7
Scaffold_550	53345	54	1	8	0.148148	2	0.037037	0	0	15	0.277778	29	0.537037	0	0			59	19	73	60	28.1481	51624	27513	43760	9560
Scaffold_562	53922	54	0.962963	24	0.444444	0	0	0	0	13	0.240741	15	0.277778	2	0.037037			1	10	19	31	11.1111	88962	67889	65662	16474.4
Scaffold_568	53369	54	0.981481	10	0.185185	0	0	0	0	12	0.222222	31	0.574074	1	0.0185185			61	38	33	67	25.5556	73908	36675	47852	13686.7
Scaffold_574	53263	54	1	16	0.296296	1	0.0185185	0	0	11	0.203704	26	0.481481	0	0			45	15	12	31	10.7407	62969	32483	40230	11660.9
Scaffold_591	53241	54	0.981481	19	0.351852	1	0.0185185	1	0.0185185	9	0.166667	23	0.425926	1	0.0185185			2	26	18	60	19.2593	44245	35303	28059	8193.52
Scaffold_593	53508	54	0.981481	21	0.388889	2	0.037037	0	0	7	0.12963	23	0.425926	1	0.0185185			2	11	42	40	17.2222	53895	40545	45106	9980.56
Scaffold_524	52035	53	0.981132	22	0.415094	0	0	0	0	13	0.245283	17	0.320755	1	0.0188679			2	18	38	12	12.8302	47391	30557	33494	8941.7
Scaffold_531	52011	53	1	10	0.188679	2	0.0377358	0	0	10	0.188679	31	0.584906	0	0			1	7	0	6	2.45283	30623	23241	18811	5777.92
Scaffold_538	52918	53	1	17	0.320755	2	0.0377358	0	0	12	0.226415	22	0.415094	0	0			2	11	33	90	25.283	48336	29893	31198	9120
Scaffold_540	52764	53	1	27	0.509434	0	0	0	0	10	0.188679	16	0.301887	0	0			5	18	1	91	20.7547	47983	42772	30002	9053.4
Scaffold_544	52699	53	1	27	0.509434	1	0.0188679	0	0	9	0.169811	16	0.301887	0	0			3	12	11	12	6.60377	29866	28276	19292	5635.09
Scaffold_552	52573	53	0.962264	16	0.301887	1	0.0188679	0	0	4	0.0754717	30	0.566038	2	0.0377358			57	18	8	38	12.0755	72234	36449	45394	13629.1
Scaffold_553	52731	53	1	13	0.245283	1	0.0188679	0	0	13	0.245283	26	0.490566	0	0			57	38	34	25	18.3019	80592	45901	53370	15206
Scaffold_556	52644	53	0.962264	21	0.396226	2	0.0377358	0	0	9	0.169811	19	0.358491	2	0.0377358			1	16	38	22	14.3396	42636	22560	25550	8044.53
Scaffold_560	52354	53	1	14	0.264151	0	0	0	0	11	0.207547	28	0.528302	0	0			46	30	5	93	24.1509	61968	32106	40711	11692.1
Scaffold_569	52710	53	1	8	0.150943	1	0.0188679	0	0	9	0.169811	35	0.660377	0	0			39	28	46	43	22.0755	57403	31262	38783	10830.8
Scaffold_577	52927	53	0.981132	15	0.283019	4	0.0754717	1	0.0188679	15	0.283019	17	0.320755	1	0.0188679			1	41	39	15	17.9245	51825	32116	30569	9778.3
Scaffold_579	52687	53	1	16	0.301887	4	0.0754717	0	0	13	0.245283	20	0.377358	0	0			2	11	35	17	11.8868	38275	27497	25707	7221.7
Scaffold_583	52051	53	0.962264	11	0.207547	2	0.0377358	0	0	11	0.207547	27	0.509434	2	0.0377358			1	21	18	21	11.3208	46563	22926	28117	8785.47
Scaffold_598	52367	53	1	15	0.283019	4	0.0754717	0	0	8	0.150943	26	0.490566	0	0			3	4	23	13	7.54717	33001	22083	19538	6226.6
Scaffold_600	52047	53	1	19	0.358491	3	0.0566038	1	0.0188679	14	0.264151	16	0.301887	0	0			2	11	3	102	21.8868	64533	35489	42082	12176
Scaffold_604	52075	53	1	16	0.301887	0	0	0	0	6	0.113208	31	0.584906	0	0			1	17	22	28	12.6415	53591	34218	34323	10111.5
Scaffold_609	52918	53	0.981132	13	0.245283	2	0.0377358	0	0	13	0.245283	24	0.45283	1	0.0188679			1	28	27	22	14.5283	48048	30032	30879	9065.66
Scaffold_695	52254	53	0.962264	7	0.132075	0	0	0	0	10	0.188679	34	0.641509	2	0.0377358			41	14	52	22	16.6038	55249	28287	34855	10424.3
Scaffold_810	52314	53	1	7	0.132075	0	0	0	0	5	0.0943396	41	0.773585	0	0			29	17	1	102	22.6415	38802	20176	25001	7321.13
Scaffold_498	51021	52	1	18	0.346154	1	0.0192308	0	0	15	0.288462	18	0.346154	0	0			63	67	20	94	34.8077	67461	34647	41201	12973.3
Scaffold_507	51075	52	0.923077	16	0.307692	1	0.0192308	0	0	14	0.269231	17	0.326923	4	0.0769231			62	12	2	7	4.03846	27037	17692	16967	5199.42
Scaffold_546	51954	52	0.942308	11	0.211538	5	0.0961538	1	0.0192308	18	0.346154	14	0.269231	3	0.0576923			3	24	21	15	11.5385	47482	35149	30532	9131.15
Scaffold_554	51769	52	0.961538	27	0.519231	1	0.0192308	0	0	13	0.25	9	0.173077	2	0.0384615			6	23	45	28	18.4615	56323	39491	36126	10831.3
Scaffold_564	51832	52	0.961538	15	0.288462	2	0.0384615	0	0	14	0.269231	19	0.365385	2	0.0384615			63	34	60	100	37.3077	67508	32795	41445	12982.3
Scaffold_570	51340	52	0.923077	21	0.403846	2	0.0384615	1	0.0192308	5	0.0961538	19	0.365385	4	0.0769231			2	19	4	99	23.4615	47957	31010	31548	9222.5
Scaffold_571	51723	52	0.980769	15	0.288462	4	0.0769231	0	0	11	0.211538	21	0.403846	1	0.0192308			5	8	7	38	10.1923	46113	33309	31957	8867.88
Scaffold_575	51044	52	1	20	0.384615	2	0.0384615	1	0.0192308	10	0.192308	19	0.365385	0	0			2	10	23	18	9.80769	46519	28847	29078	8945.96
Scaffold_581	51467	52	0.980769	18	0.346154	0	0	0	0	4	0.0769231	29	0.557692	1	0.0192308			27	17	46	45	20.7692	43436	22273	28317	8353.08
Scaffold_584	51135	52	1	7	0.134615	3	0.0576923	0	0	10	0.192308	32	0.615385	0	0			1	4	27	38	13.2692	58598	31329	37347	11268.8
Scaffold_594	51746	52	1	4	0.0769231	0	0	0	0	6	0.115385	42	0.807692	0	0			28	3	101	26	25	41828	21631	27482	8043.85
Scaffold_601	51745	52	1	6	0.115385	4	0.0769231	0	0	15	0.288462	27	0.519231	0	0			31	16	1	23	7.69231	39067	18826	23611	7512.88
Scaffold_613	51131	52	1	8	0.153846	1	0.0192308	0	0	8	0.153846	35	0.673077	0	0			39	27	0	97	23.8462	60566	32312	40507	11647.3
Scaffold_628	51072	52	1	19	0.365385	0	0	0	0	6	0.115385	27	0.519231	0	0			30	29	33	48	21.1538	60913	33268	40683	11714
Scaffold_665	51508	52	1	25	0.480769	1	0.0192308	1	0.0192308	6	0.115385	19	0.365385	0	0			4	24	71	28	23.6538	56232	35467	42155	10813.8
Scaffold_541	50522	51	0.960784	16	0.313725	2	0.0392157	0	0	12	0.235294	19	0.372549	2	0.0392157			44	14	0	40	10.5882	52192	33625	33206	10233.7
Scaffold_561	50921	51	1	15	0.294118	1	0.0196078	0	0	11	0.215686	24	0.470588	0	0			56	23	25	26	14.5098	58097	33775	44709	11391.6
Scaffold_572	50909	51	1	12	0.235294	1	0.0196078	0	0	11	0.215686	27	0.529412	0	0			37	20	2	25	9.21569	50835	25892	32406	9967.65
Scaffold_573	50809	51	0.980392	10	0.196078	2	0.0392157	0	0	13	0.254902	25	0.490196	1	0.0196078			54	15	12	11	7.45098	33290	25764	20389	6527.45
Scaffold_578	50217	51	0.941176	20	0.392157	1	0.0196078	0	0	13	0.254902	14	0.27451	3	0.0588235			3	13	10	29	10.1961	45081	25875	26818	8839.41
Scaffold_589	50309	51	0.980392	17	0.333333	1	0.0196078	0	0	13	0.254902	19	0.372549	1	0.0196078			75	23	44	255	63.1373	71471	36076	45534	14013.9
Scaffold_597	50278	51	1	7	0.137255	3	0.0588235	0	0	7	0.137255	34	0.666667	0	0			29	17	23	24	12.549	47236	23641	30105	9261.96
Scaffold_602	50387	51	1	16	0.313725	1	0.0196078	0	0	8	0.156863	26	0.509804	0	0			71	21	3	30	10.5882	87639	50302	59982	17184.1
Scaffold_624	50798	51	0.980392	9	0.176471	1	0.0196078	0	0	5	0.0980392	35	0.686275	1	0.0196078			57	23	30	19	14.1176	48188	24666	30536	9448.63
Scaffold_683	50851	51	0.980392	13	0.254902	2	0.0392157	0	0	13	0.254902	22	0.431373	1	0.0196078			3	23	32	21	14.902	41057	24969	25810	8050.39
Scaffold_567	49557	50	0.98	7	0.14	1	0.02	0	0	8	0.16	33	0.66	1	0.02			39	16	20	33	13.8	34860	18137	21210	6972
Scaffold_585	49231	50	0.98	10	0.2	2	0.04	0	0	14	0.28	23	0.46	1	0.02			52	29	47	24	20	68380	35827	44230	13676
Scaffold_588	49496	50	0.98	20	0.4	2	0.04	0	0	13	0.26	14	0.28	1	0.02			61	176	21	36	46.6	50484	29840	33010	10096.8
Scaffold_592	49718	50	0.98	23	0.46	3	0.06	0	0	11	0.22	12	0.24	1	0.02			3	19	65	32	23.2	45475	37508	28350	9095
Scaffold_595	49545	50	1	8	0.16	2	0.04	1	0.02	13	0.26	26	0.52	0	0			2	10	45	12	13.4	42254	21905	25487	8450.8
Scaffold_599	49223	50	0.98	10	0.2	0	0	0	0	8	0.16	31	0.62	1	0.02			40	25	14	29	13.6	42928	23047	26701	8585.6
Scaffold_607	49869	50	0.94	16	0.32	0	0	1	0.02	12	0.24	18	0.36	3	0.06			2	14	9	16	7.8	44332	28340	25966	8866.4
Scaffold_629	49637	50	0.94	14	0.28	2	0.04	0	0	7	0.14	24	0.48	3	0.06			1	4	7	4	3	27975	13870	17042	5595
Scaffold_633	49784	50	1	12	0.24	0	0	0	0	14	0.28	24	0.48	0	0			2	17	25	50	18.4	99199	67826	73412	19839.8
Scaffold_638	49554	50	0.98	23	0.46	0	0	0	0	7	0.14	19	0.38	1	0.02			1	30	15	10	11	34891	26990	21881	6978.2
Scaffold_666	49645	50	0.98	9	0.18	2	0.04	0	0	11	0.22	27	0.54	1	0.02			1	32	142	12	37.2	42923	29073	29921	8584.6
Scaffold_700	49592	50	1	10	0.2	0	0	0	0	9	0.18	31	0.62	0	0			40	26	0	38	12.8	44454	26989	27435	8890.8
Scaffold_708	49400	50	0.98	10	0.2	1	0.02	0	0	7	0.14	31	0.62	1	0.02			1	13	32	20	13	56188	35993	36494	11237.6
Scaffold_586	48254	49	0.959184	21	0.428571	2	0.0408163	0	0	17	0.346939	7	0.142857	2	0.0408163			66	26	19	7	10.6122	34578	52239	23450	7056.73
Scaffold_590	48915	49	0.959184	16	0.326531	2	0.0408163	0	0	13	0.265306	16	0.326531	2	0.0408163			56	16	158	70	49.7959	48634	23596	34894	9925.31
Scaffold_614	48686	49	1	13	0.265306	0	0	0	0	7	0.142857	29	0.591837	0	0			43	23	0	17	8.16327	54861	28976	34959	11196.1
Scaffold_619	48612	49	0.938776	4	0.0816327	0	0	0	0	5	0.102041	37	0.755102	3	0.0612245			1	9	22	45	15.5102	29463	15101	19231	6012.86
Scaffold_631	48110	49	0.979592	11	0.22449	2	0.0408163	0	0	6	0.122449	29	0.591837	1	0.0204082			63	19	43	48	22.449	56753	29373	35642	11582.2
Scaffold_632	48102	49	0.959184	20	0.408163	2	0.0408163	0	0	8	0.163265	17	0.346939	2	0.0408163			1	34	38	29	20.6122	44843	23120	32360	9151.63
Scaffold_636	48631	49	0.959184	12	0.244898	0	0	0	0	10	0.204082	25	0.510204	2	0.0408163			1	9	21	20	10.2041	48849	26706	34331	9969.18
Scaffold_652	48061	49	0.938776	10	0.204082	3	0.0612245	0	0	14	0.285714	19	0.387755	3	0.0612245			39	15	2	11	5.71429	47105	26793	28847	9613.27
Scaffold_660	48996	49	0.979592	11	0.22449	2	0.0408163	0	0	10	0.204082	25	0.510204	1	0.0204082			2	17	43	177	48.3673	55832	27925	39862	11394.3
Scaffold_691	48713	49	1	6	0.122449	1	0.0204082	0	0	10	0.204082	32	0.653061	0	0			33	32	21	21	15.102	35155	17151	20932	7174.49
Scaffold_703	48244	49	1	5	0.102041	0	0	0	0	11	0.22449	33	0.673469	0	0			39	22	70	19	22.6531	50432	25504	31913	10292.2
Scaffold_587	47867	48	0.9375	16	0.333333	1	0.0208333	1	0.0208333	17	0.354167	10	0.208333	3	0.0625			67	24	19	63	22.0833	56343	34227	35590	11738.1
Scaffold_610	47578	48	0.979167	31	0.645833	1	0.0208333	0	0	6	0.125	9	0.1875	1	0.0208333			30	23	0	44	13.9583	110827	110626	165161	23089
Scaffold_623	47829	48	0.979167	15	0.3125	0	0	1	0.0208333	11	0.229167	20	0.416667	1	0.0208333			2	12	34	13	12.2917	38654	19319	25116	8052.92
Scaffold_645	47063	48	1	16	0.333333	4	0.0833333	2	0.0416667	8	0.166667	18	0.375	0	0			71	22	27	62	23.125	52257	32283	32480	10886.9
Scaffold_694	47321	48	1	10	0.208333	0	0	0	0	7	0.145833	31	0.645833	0	0			33	24	91	46	33.5417	43874	21831	27632	9140.42
Scaffold_739	47727	48	0.979167	15	0.3125	1	0.0208333	0	0	3	0.0625	28	0.583333	1	0.0208333			1	12	17	18	9.79167	57503	45248	43225	11979.8
Scaffold_906	47529	48	1	8	0.166667	0	0	0	0	4	0.0833333	36	0.75	0	0			36	7	2	49	12.0833	36159	19516	24061	7533.12
Scaffold_535	46843	47	0.957447	8	0.170213	3	0.0638298	1	0.0212766	12	0.255319	21	0.446809	2	0.0425532			45	36	39	40	24.4681	58339	29743	36997	12412.6
Scaffold_606	46310	47	0.93617	11	0.234043	4	0.0851064	1	0.0212766	13	0.276596	15	0.319149	3	0.0638298			50	16	36	24	16.1702	40579	21197	26380	8633.83
Scaffold_648	46425	47	1	12	0.255319	1	0.0212766	0	0	8	0.170213	26	0.553191	0	0			41	16	17	14	10	35015	17903	20632	7450
Scaffold_663	46517	47	1	13	0.276596	4	0.0851064	0	0	12	0.255319	18	0.382979	0	0			4	8	103	25	28.9362	37495	26745	33109	7977.66
Scaffold_671	46003	47	1	10	0.212766	1	0.0212766	0	0	10	0.212766	26	0.553191	0	0			47	18	45	24	18.5106	46425	26215	31044	9877.66
Scaffold_677	46095	47	1	14	0.297872	1	0.0212766	0	0	10	0.212766	22	0.468085	0	0			40	25	33	31	18.9362	70341	35922	45842	14966.2
Scaffold_692	46520	47	1	6	0.12766	2	0.0425532	0	0	7	0.148936	32	0.680851	0	0			37	24	47	42	24.0426	44110	22430	28053	9385.11
Scaffold_779	46182	47	1	6	0.12766	1	0.0212766	0	0	10	0.212766	30	0.638298	0	0			41	18	0	22	8.51064	40182	20597	25837	8549.36
Scaffold_605	46000	46	1	5	0.108696	2	0.0434783	0	0	9	0.195652	30	0.652174	0	0			45	25	36	47	23.4783	48571	24420	30218	10558.9
Scaffold_618	45281	46	1	3	0.0652174	0	0	1	0.0217391	8	0.173913	34	0.73913	0	0			42	36	3	32	15.4348	23758	12290	14793	5164.78
Scaffold_621	45677	46	0.978261	17	0.369565	2	0.0434783	0	0	13	0.282609	13	0.282609	1	0.0217391			41	18	12	74	22.6087	46224	46589	29296	10048.7
Scaffold_626	45006	46	1	21	0.456522	1	0.0217391	0	0	10	0.217391	14	0.304348	0	0			61	27	0	22	10.6522	45276	33421	28345	9842.61
Scaffold_627	45507	46	0.913043	14	0.304348	2	0.0434783	0	0	9	0.195652	17	0.369565	4	0.0869565			58	28	161	83	59.1304	65884	43640	41713	14322.6
Scaffold_661	45202	46	1	12	0.26087	1	0.0217391	1	0.0217391	9	0.195652	23	0.5	0	0			1	15	36	38	19.3478	50413	32799	30449	10959.3
Scaffold_712	45506	46	1	9	0.195652	0	0	1	0.0217391	7	0.152174	29	0.630435	0	0			34	25	13	30	14.7826	31887	17558	21653	6931.96
Scaffold_713	45959	46	0.978261	8	0.173913	1	0.0217391	0	0	11	0.23913	25	0.543478	1	0.0217391			58	25	74	24	26.7391	66459	36077	44554	14447.6
Scaffold_730	45446	46	1	6	0.130435	0	0	0	0	7	0.152174	33	0.717391	0	0			26	29	38	50	25.4348	77830	51388	59123	16919.6
Scaffold_773	45426	46	0.978261	7	0.152174	1	0.0217391	0	0	4	0.0869565	33	0.717391	1	0.0217391			2	7	14	80	21.9565	26919	13964	17753	5851.96
Scaffold_611	44034	45	0.977778	11	0.244444	0	0	0	0	5	0.111111	28	0.622222	1	0.0222222			31	11	1	15	6	19891	9945	11118	4420.22
Scaffold_615	44647	45	0.955556	14	0.311111	4	0.0888889	0	0	11	0.244444	14	0.311111	2	0.0444444			50	17	0	22	8.66667	33471	25030	20787	7438
Scaffold_616	44083	45	0.955556	20	0.444444	3	0.0666667	0	0	13	0.288889	7	0.155556	2	0.0444444			59	24	2	6	7.11111	31063	18353	19309	6902.89
Scaffold_622	44481	45	0.977778	19	0.422222	0	0	0	0	11	0.244444	14	0.311111	1	0.0222222			31	10	41	38	19.7778	48638	26999	34608	10808.4
Scaffold_625	44396	45	0.911111	20	0.444444	1	0.0222222	0	0	10	0.222222	10	0.222222	4	0.0888889			72	10	36	7	11.7778	32810	27421	24213	7291.11
Scaffold_630	44762	45	0.977778	13	0.288889	0	0	0	0	8	0.177778	23	0.511111	1	0.0222222			40	29	34	43	23.5556	48689	26784	31961	10819.8
Scaffold_643	44099	45	1	15	0.333333	0	0	0	0	8	0.177778	22	0.488889	0	0			34	18	6	18	9.33333	51322	27389	33074	11404.9
Scaffold_644	44847	45	0.977778	13	0.288889	2	0.0444444	1	0.0222222	6	0.133333	22	0.488889	1	0.0222222			39	24	48	25	21.5556	45408	28170	27784	10090.7
Scaffold_646	44855	45	1	8	0.177778	0	0	0	0	11	0.244444	26	0.577778	0	0			32	7	42	7	12.4444	45006	30016	29728	10001.3
Scaffold_651	44941	45	1	20	0.444444	1	0.0222222	0	0	9	0.2	15	0.333333	0	0			54	11	6	6	5.11111	45487	23622	44156	10108.2
Scaffold_659	44360	45	0.933333	11	0.244444	2	0.0444444	0	0	10	0.222222	19	0.422222	3	0.0666667			36	10	16	41	14.8889	40221	31674	25548	8938
Scaffold_697	44395	45	1	3	0.0666667	1	0.0222222	0	0	6	0.133333	35	0.777778	0	0			29	11	28	10	10.8889	27992	14388	18208	6220.44
Scaffold_731	44866	45	1	11	0.244444	0	0	0	0	8	0.177778	26	0.577778	0	0			2	7	17	23	10.4444	58880	34003	41168	13084.4
Scaffold_797	44845	45	1	15	0.333333	1	0.0222222	0	0	3	0.0666667	26	0.577778	0	0			3	9	11	12	7.11111	43291	28576	29956	9620.22
Scaffold_634	43845	44	0.977273	32	0.727273	1	0.0227273	1	0.0227273	6	0.136364	3	0.0681818	1	0.0227273			47	24	17	4	10.2273	40916	49997	25247	9299.09
Scaffold_641	43194	44	1	12	0.272727	0	0	0	0	4	0.0909091	28	0.636364	0	0			39	18	22	52	20.9091	45661	24774	29928	10377.5
Scaffold_647	43013	44	0.977273	14	0.318182	0	0	0	0	8	0.181818	21	0.477273	1	0.0227273			46	9	21	31	13.8636	51541	34726	32466	11713.9
Scaffold_653	43060	44	1	10	0.227273	0	0	2	0.0454545	10	0.227273	22	0.5	0	0			36	32	2	39	16.5909	50153	26071	34326	11398.4
Scaffold_654	43364	44	1	15	0.340909	4	0.0909091	0	0	18	0.409091	7	0.159091	0	0			69	10	5	12	6.13636	46259	23402	27568	10513.4
Scaffold_656	43386	44	1	4	0.0909091	1	0.0227273	1	0.0227273	4	0.0909091	34	0.772727	0	0			34	13	14	28	12.5	38541	18965	23820	8759.32
Scaffold_667	43256	44	0.977273	12	0.272727	0	0	0	0	13	0.295455	18	0.409091	1	0.0227273			46	13	79	45	31.1364	48565	23537	29477	11037.5
Scaffold_684	43749	44	1	10	0.227273	0	0	0	0	4	0.0909091	30	0.681818	0	0			32	16	23	18	12.9545	32457	16689	20711	7376.59
Scaffold_687	43495	44	1	4	0.0909091	4	0.0909091	0	0	10	0.227273	26	0.590909	0	0			44	23	31	33	19.7727	53906	30683	35106	12251.4
Scaffold_688	43223	44	0.931818	13	0.295455	0	0	0	0	10	0.227273	18	0.409091	3	0.0681818			1	21	55	25	22.9545	42834	22399	26232	9735
Scaffold_789	43885	44	1	9	0.204545	0	0	0	0	5	0.113636	30	0.681818	0	0			37	14	57	52	27.9545	74960	47187	54391	17036.4
Scaffold_639	42070	43	0.976744	8	0.186047	0	0	0	0	8	0.186047	26	0.604651	1	0.0232558			40	11	27	32	16.2791	44474	23054	28903	10342.8
Scaffold_640	42858	43	0.976744	13	0.302326	0	0	0	0	8	0.186047	21	0.488372	1	0.0232558			56	10	27	61	22.7907	45687	24966	29835	10624.9
Scaffold_642	42797	43	1	5	0.116279	1	0.0232558	0	0	5	0.116279	32	0.744186	0	0			27	14	40	23	17.907	39996	19452	25463	9301.4
Scaffold_649	42284	43	0.953488	21	0.488372	1	0.0232558	0	0	7	0.162791	12	0.27907	2	0.0465116			44	20	27	8	12.7907	35817	32134	29471	8329.53
Scaffold_658	42068	43	0.976744	14	0.325581	2	0.0465116	0	0	18	0.418605	8	0.186047	1	0.0232558			47	46	18	19	19.3023	41580	30488	26677	9669.77
Scaffold_670	42249	43	0.930233	9	0.209302	1	0.0232558	0	0	7	0.162791	23	0.534884	3	0.0697674			28	10	22	27	13.7209	33167	17432	20152	7713.26
Scaffold_675	42997	43	0.976744	19	0.44186	3	0.0697674	0	0	7	0.162791	13	0.302326	1	0.0232558			47	35	22	29	20	40766	21269	27139	9480.47
Scaffold_680	42663	43	0.976744	4	0.0930233	0	0	0	0	10	0.232558	28	0.651163	1	0.0232558			27	11	14	78	23.9535	64938	42505	46562	15101.9
Scaffold_682	42791	43	0.976744	3	0.0697674	0	0	0	0	10	0.232558	29	0.674419	1	0.0232558			38	17	24	45	20	46128	24041	29947	10727.4
Scaffold_690	42138	43	0.976744	12	0.27907	1	0.0232558	0	0	4	0.0930233	25	0.581395	1	0.0232558			38	25	67	79	39.7674	48932	34389	30467	11379.5
Scaffold_720	42188	43	1	9	0.209302	1	0.0232558	1	0.0232558	7	0.162791	25	0.581395	0	0			28	12	30	113	36.0465	58530	31457	38603	13611.6
Scaffold_727	42861	43	0.953488	7	0.162791	0	0	0	0	9	0.209302	25	0.581395	2	0.0465116			49	23	20	45	20.4651	54786	28809	35677	12740.9
Scaffold_740	42681	43	1	19	0.44186	0	0	0	0	5	0.116279	19	0.44186	0	0			2	7	30	34	16.5116	26534	27945	16759	6170.7
Scaffold_764	42901	43	1	6	0.139535	0	0	0	0	7	0.162791	30	0.697674	0	0			47	5	33	45	19.3023	41797	20225	25267	9720.23
Scaffold_655	41388	42	1	14	0.333333	1	0.0238095	0	0	12	0.285714	15	0.357143	0	0			63	18	2	37	13.5714	45470	26457	27967	10826.2
Scaffold_664	41642	42	0.97619	6	0.142857	1	0.0238095	0	0	7	0.166667	27	0.642857	1	0.0238095			38	9	27	36	17.1429	44313	22888	27926	10550.7
Scaffold_669	41935	42	0.97619	12	0.285714	0	0	0	0	4	0.0952381	25	0.595238	1	0.0238095			38	11	27	19	13.5714	41914	23047	27623	9979.52
Scaffold_672	41935	42	1	5	0.119048	2	0.047619	0	0	7	0.166667	28	0.666667	0	0			40	52	15	36	24.5238	36022	20424	24329	8576.67
Scaffold_674	41693	42	1	11	0.261905	3	0.0714286	0	0	15	0.357143	13	0.309524	0	0			67	34	9	59	24.2857	53484	28671	32571	12734.3
Scaffold_685	41981	42	1	21	0.5	4	0.0952381	0	0	1	0.0238095	16	0.380952	0	0			32	11	32	39	19.5238	36728	32920	22984	8744.76
Scaffold_702	41369	42	1	11	0.261905	1	0.0238095	0	0	8	0.190476	22	0.52381	0	0			26	11	41	53	25	52692	28248	34537	12545.7
Scaffold_761	41721	42	1	4	0.0952381	3	0.0714286	0	0	6	0.142857	29	0.690476	0	0			42	12	19	43	17.619	39296	21290	24786	9356.19
Scaffold_793	41464	42	1	8	0.190476	1	0.0238095	0	0	4	0.0952381	29	0.690476	0	0			34	15	4	21	9.52381	39382	19581	24850	9376.67
Scaffold_620	40404	41	0.95122	15	0.365854	3	0.0731707	1	0.0243902	5	0.121951	15	0.365854	2	0.0487805			68	11	4	62	18.7805	33403	17159	21253	8147.07
Scaffold_673	40388	41	0.95122	20	0.487805	1	0.0243902	0	0	6	0.146341	12	0.292683	2	0.0487805			52	15	68	85	40.9756	54330	35115	33407	13251.2
Scaffold_678	40765	41	0.926829	18	0.439024	1	0.0243902	0	0	13	0.317073	6	0.146341	3	0.0731707			44	12	59	10	19.7561	33168	28542	20742	8089.76
Scaffold_679	40892	41	0.95122	12	0.292683	2	0.0487805	0	0	11	0.268293	14	0.341463	2	0.0487805			44	10	5	10	6.09756	33368	36146	20434	8138.54
Scaffold_701	40117	41	0.97561	11	0.268293	1	0.0243902	0	0	11	0.268293	17	0.414634	1	0.0243902			47	5	0	7	2.92683	18798	9481	10220	4584.88
Scaffold_704	40958	41	0.926829	8	0.195122	4	0.097561	1	0.0243902	13	0.317073	12	0.292683	3	0.0731707			54	7	36	5	11.7073	32115	15893	25464	7832.93
Scaffold_705	40921	41	0.926829	6	0.146341	2	0.0487805	0	0	13	0.317073	17	0.414634	3	0.0731707			50	38	19	21	19.0244	50375	25460	31268	12286.6
Scaffold_714	40534	41	1	6	0.146341	0	0	0	0	3	0.0731707	32	0.780488	0	0			36	15	36	18	16.8293	26459	12948	16517	6453.41
Scaffold_737	40356	41	1	9	0.219512	0	0	1	0.0243902	7	0.170732	24	0.585366	0	0			38	40	31	19	21.9512	57720	28925	37793	14078
Scaffold_744	40013	41	1	13	0.317073	0	0	0	0	5	0.121951	23	0.560976	0	0			46	23	18	53	22.9268	46799	24697	31127	11414.4
Scaffold_755	40692	41	1	6	0.146341	1	0.0243902	0	0	2	0.0487805	32	0.780488	0	0			28	6	7	18	7.56098	26788	13970	17679	6533.66
Scaffold_756	40451	41	1	6	0.146341	1	0.0243902	0	0	9	0.219512	25	0.609756	0	0			42	4	14	10	6.82927	36784	18734	22906	8971.71
Scaffold_765	40351	41	0.97561	15	0.365854	2	0.0487805	0	0	5	0.121951	18	0.439024	1	0.0243902			1	10	38	20	16.5854	40797	21619	29529	9950.49
Scaffold_769	40518	41	0.95122	9	0.219512	3	0.0731707	0	0	6	0.146341	21	0.512195	2	0.0487805			36	14	3	25	10.2439	30980	15090	18116	7556.1
Scaffold_792	40762	41	0.95122	4	0.097561	2	0.0487805	0	0	5	0.121951	28	0.682927	2	0.0487805			49	24	86	18	31.2195	105747	65626	78714	25792
Scaffold_847	40800	41	1	10	0.243902	1	0.0243902	0	0	5	0.121951	25	0.609756	0	0			25	5	36	21	15.122	31028	15716	19574	7567.8
Scaffold_657	39884	40	1	9	0.225	2	0.05	0	0	10	0.25	19	0.475	0	0			48	34	51	38	30.75	52520	26618	33205	13130
Scaffold_668	39639	40	1	10	0.25	0	0	0	0	5	0.125	25	0.625	0	0			38	19	17	19	13.75	44306	31988	30295	11076.5
Scaffold_676	39658	40	1	9	0.225	0	0	0	0	6	0.15	25	0.625	0	0			46	19	10	46	18.75	47511	23828	28907	11877.8
Scaffold_693	39671	40	1	21	0.525	1	0.025	0	0	5	0.125	13	0.325	0	0			36	9	17	33	14.75	64409	50171	46612	16102.2
Scaffold_699	39615	40	1	14	0.35	0	0	0	0	10	0.25	16	0.4	0	0			44	25	43	40	27	58491	29927	37772	14622.8
Scaffold_706	39627	40	1	12	0.3	0	0	0	0	5	0.125	23	0.575	0	0			48	17	23	41	20.25	37899	19297	24402	9474.75
Scaffold_707	39628	40	1	5	0.125	1	0.025	0	0	20	0.5	14	0.35	0	0			51	10	24	32	16.5	42736	20668	26020	10684
Scaffold_709	39318	40	1	12	0.3	0	0	0	0	12	0.3	16	0.4	0	0			47	10	10	9	7.25	25131	25361	17396	6282.75
Scaffold_710	39191	40	0.925	21	0.525	0	0	0	0	9	0.225	7	0.175	3	0.075			40	8	12	10	7.5	22351	16694	21713	5587.75
Scaffold_711	39370	40	1	14	0.35	1	0.025	0	0	11	0.275	14	0.35	0	0			50	25	30	37	23	49192	31699	30782	12298
Scaffold_716	39771	40	0.975	4	0.1	1	0.025	0	0	7	0.175	27	0.675	1	0.025			28	40	38	42	30	45393	25275	30048	11348.2
Scaffold_717	39833	40	1	20	0.5	1	0.025	0	0	7	0.175	12	0.3	0	0			41	16	8	13	9.25	32025	24448	18472	8006.25
Scaffold_724	39598	40	0.95	10	0.25	1	0.025	0	0	7	0.175	20	0.5	2	0.05			48	9	33	56	24.5	51200	27556	32792	12800
Scaffold_728	39507	40	0.975	11	0.275	0	0	0	0	2	0.05	26	0.65	1	0.025			42	14	5	23	10.5	34278	18025	21527	8569.5
Scaffold_729	39007	40	1	4	0.1	1	0.025	0	0	9	0.225	26	0.65	0	0			44	11	25	18	13.5	31036	20976	19054	7759
Scaffold_735	39231	40	1	6	0.15	0	0	1	0.025	10	0.25	23	0.575	0	0			49	29	15	27	17.75	34687	19569	22141	8671.75
Scaffold_736	39829	40	1	12	0.3	0	0	0	0	8	0.2	20	0.5	0	0			35	11	58	25	23.5	40517	20753	26031	10129.2
Scaffold_745	39777	40	1	6	0.15	0	0	0	0	15	0.375	19	0.475	0	0			35	13	7	8	7	28729	15765	18023	7182.25
Scaffold_763	39066	40	0.975	6	0.15	1	0.025	0	0	4	0.1	28	0.7	1	0.025			27	7	34	25	16.5	45710	24379	29358	11427.5
Scaffold_855	39337	40	1	4	0.1	0	0	0	0	5	0.125	31	0.775	0	0			39	17	17	30	16	38305	21557	26771	9576.25
Scaffold_689	38390	39	1	13	0.333333	1	0.025641	0	0	3	0.0769231	22	0.564103	0	0			17	15	14	49	20	29943	15392	19598	7677.69
Scaffold_698	38658	39	1	3	0.0769231	0	0	0	0	10	0.25641	26	0.666667	0	0			25	15	20	31	16.9231	27187	14319	16775	6971.03
Scaffold_715	38441	39	0.974359	12	0.307692	0	0	0	0	6	0.153846	20	0.512821	1	0.025641			63	16	17	24	14.6154	47322	35973	29524	12133.8
Scaffold_718	38803	39	0.974359	12	0.307692	0	0	0	0	10	0.25641	16	0.410256	1	0.025641			53	3	7	22	8.20513	27481	23702	17210	7046.41
Scaffold_721	38275	39	0.948718	13	0.333333	2	0.0512821	0	0	10	0.25641	12	0.307692	2	0.0512821			52	12	38	36	22.0513	30651	24294	19937	7859.23
Scaffold_738	38519	39	0.974359	9	0.230769	1	0.025641	0	0	15	0.384615	13	0.333333	1	0.025641			66	68	7	33	27.6923	46417	39528	31473	11901.8
Scaffold_749	38663	39	0.974359	2	0.0512821	1	0.025641	1	0.025641	4	0.102564	30	0.769231	1	0.025641			22	12	9	67	22.5641	26678	13622	17553	6840.51
Scaffold_752	38772	39	0.974359	17	0.435897	0	0	0	0	7	0.179487	14	0.358974	1	0.025641			57	21	37	24	21.0256	44405	25436	28316	11385.9
Scaffold_759	38530	39	0.974359	7	0.179487	0	0	0	0	2	0.0512821	29	0.74359	1	0.025641			25	5	8	5	4.61538	26034	14628	16800	6675.38
Scaffold_771	38001	39	1	10	0.25641	3	0.0769231	0	0	10	0.25641	16	0.410256	0	0			44	32	8	24	16.4103	26480	30905	16694	6789.74
Scaffold_782	38145	39	1	13	0.333333	0	0	0	0	4	0.102564	22	0.564103	0	0			28	37	1	26	16.4103	47892	29224	30939	12280
Scaffold_795	38473	39	1	2	0.0512821	1	0.025641	0	0	5	0.128205	31	0.794872	0	0			23	12	21	15	12.3077	30132	15303	19519	7726.15
Scaffold_817	38226	39	0.948718	5	0.128205	0	0	0	0	6	0.153846	26	0.666667	2	0.0512821			1	9	26	2	9.48718	31415	20468	20657	8055.13
Scaffold_895	38106	39	1	6	0.153846	1	0.025641	0	0	10	0.25641	22	0.564103	0	0			34	24	0	25	12.5641	37306	18823	23809	9565.64
Scaffold_681	37104	38	1	17	0.447368	1	0.0263158	0	0	10	0.263158	10	0.263158	0	0			42	24	80	24	33.6842	40675	34029	25047	10703.9
Scaffold_696	37327	38	0.973684	14	0.368421	1	0.0263158	1	0.0263158	8	0.210526	13	0.342105	1	0.0263158			43	16	67	25	28.4211	40127	30310	24430	10559.7
Scaffold_722	37826	38	1	30	0.789474	0	0	0	0	8	0.210526	0	0	0	0			6	0	9	9	4.73684	83	211	96	21.8421
Scaffold_723	37034	38	0.973684	13	0.342105	1	0.0263158	0	0	7	0.184211	16	0.421053	1	0.0263158			20	6	33	19	15.2632	23532	12301	15448	6192.63
Scaffold_726	37756	38	1	11	0.289474	2	0.0526316	0	0	5	0.131579	20	0.526316	0	0			28	21	14	8	11.3158	26612	13487	16189	7003.16
Scaffold_732	37319	38	1	12	0.315789	5	0.131579	0	0	8	0.210526	13	0.342105	0	0			50	17	28	7	13.6842	37441	22321	24731	9852.89
Scaffold_743	37546	38	1	13	0.342105	0	0	0	0	7	0.184211	18	0.473684	0	0			50	24	2	13	10.2632	33640	20467	20667	8852.63
Scaffold_747	37365	38	0.973684	11	0.289474	2	0.0526316	0	0	10	0.263158	14	0.368421	1	0.0263158			43	13	30	4	12.3684	23827	12860	16593	6270.26
Scaffold_766	37211	38	1	11	0.289474	1	0.0263158	0	0	9	0.236842	17	0.447368	0	0			30	11	31	36	20.5263	41342	21852	27957	10879.5
Scaffold_774	37135	38	0.973684	8	0.210526	2	0.0526316	0	0	6	0.157895	21	0.552632	1	0.0263158			22	24	30	20	19.4737	53475	31305	37077	14072.4
Scaffold_775	37167	38	1	11	0.289474	1	0.0263158	0	0	3	0.0789474	23	0.605263	0	0			38	19	21	11	13.4211	29077	14414	18138	7651.84
Scaffold_783	37728	38	1	5	0.131579	2	0.0526316	0	0	7	0.184211	24	0.631579	0	0			46	7	0	34	10.7895	36901	18241	22693	9710.79
Scaffold_790	37293	38	1	5	0.131579	1	0.0263158	0	0	10	0.263158	22	0.578947	0	0			33	11	45	66	32.1053	42127	20599	25469	11086.1
Scaffold_806	37222	38	0.973684	4	0.105263	2	0.0526316	0	0	5	0.131579	26	0.684211	1	0.0263158			31	14	12	46	18.9474	26195	13200	16543	6893.42
Scaffold_808	37487	38	0.947368	9	0.236842	0	0	0	0	6	0.157895	21	0.552632	2	0.0526316			31	23	27	50	26.3158	47982	25375	31190	12626.8
Scaffold_818	37525	38	1	8	0.210526	0	0	0	0	6	0.157895	24	0.631579	0	0			31	14	6	11	8.15789	22145	11558	14194	5827.63
Scaffold_821	37135	38	1	12	0.315789	1	0.0263158	0	0	8	0.210526	17	0.447368	0	0			31	23	36	45	27.3684	43968	21397	26421	11570.5
Scaffold_850	37068	38	0.973684	6	0.157895	1	0.0263158	0	0	12	0.315789	18	0.473684	1	0.0263158			31	28	43	75	38.4211	38204	20261	23801	10053.7
Scaffold_872	37589	38	0.973684	11	0.289474	1	0.0263158	0	0	5	0.131579	20	0.526316	1	0.0263158			1	6	5	2	3.42105	27746	13821	16210	7301.58
Scaffold_725	36658	37	0.972973	7	0.189189	0	0	1	0.027027	6	0.162162	22	0.594595	1	0.027027			32	28	24	30	22.1622	71185	49524	54167	19239.2
Scaffold_741	36768	37	1	9	0.243243	0	0	0	0	14	0.378378	14	0.378378	0	0			53	17	88	103	56.2162	46777	22912	28780	12642.4
Scaffold_746	36578	37	0.918919	20	0.540541	1	0.027027	1	0.027027	5	0.135135	7	0.189189	3	0.0810811			54	7	8	6	5.67568	19990	12040	13012	5402.7
Scaffold_748	36970	37	0.972973	14	0.378378	1	0.027027	0	0	12	0.324324	9	0.243243	1	0.027027			53	6	11	21	10.2703	34896	18442	25735	9431.35
Scaffold_751	36637	37	0.945946	13	0.351351	1	0.027027	0	0	14	0.378378	7	0.189189	2	0.0540541			52	8	31	21	16.2162	41727	38568	27664	11277.6
Scaffold_753	36319	37	0.972973	13	0.351351	2	0.0540541	0	0	7	0.189189	14	0.378378	1	0.027027			43	13	19	64	25.9459	46481	31513	29216	12562.4
Scaffold_754	36016	37	1	10	0.27027	1	0.027027	0	0	2	0.0540541	24	0.648649	0	0			35	16	30	14	16.2162	45576	24425	29726	12317.8
Scaffold_757	36554	37	0.945946	16	0.432432	0	0	0	0	6	0.162162	13	0.351351	2	0.0540541			51	14	13	22	13.2432	48084	24176	30895	12995.7
Scaffold_762	36100	37	0.972973	23	0.621622	1	0.027027	0	0	4	0.108108	8	0.216216	1	0.027027			36	27	17	36	21.6216	25422	14644	24509	6870.81
Scaffold_785	36564	37	1	4	0.108108	0	0	0	0	7	0.189189	26	0.702703	0	0			29	25	10	27	16.7568	22733	11276	15040	6144.05
Scaffold_833	36880	37	1	8	0.216216	0	0	1	0.027027	6	0.162162	22	0.594595	0	0			31	16	27	42	22.973	36666	19088	23648	9909.73
Scaffold_839	36156	37	1	11	0.297297	0	0	0	0	7	0.189189	19	0.513514	0	0			34	27	32	17	20.5405	34113	16725	21213	9219.73
Scaffold_686	35407	36	1	5	0.138889	1	0.0277778	0	0	2	0.0555556	28	0.777778	0	0			15	11	61	63	37.5	35880	18739	24378	9966.67
Scaffold_750	35792	36	1	10	0.277778	2	0.0555556	0	0	5	0.138889	19	0.527778	0	0			21	17	18	10	12.5	25060	13030	16025	6961.11
Scaffold_758	35595	36	0.972222	16	0.444444	1	0.0277778	0	0	9	0.25	9	0.25	1	0.0277778			40	8	21	6	9.72222	28161	14114	17915	7822.5
Scaffold_760	35453	36	1	13	0.361111	2	0.0555556	1	0.0277778	12	0.333333	8	0.222222	0	0			49	8	18	15	11.3889	44178	24413	30745	12271.7
Scaffold_767	35272	36	1	8	0.222222	1	0.0277778	0	0	11	0.305556	16	0.444444	0	0			60	21	26	24	19.7222	39577	19495	24516	10993.6
Scaffold_772	35213	36	1	7	0.194444	0	0	0	0	6	0.166667	23	0.638889	0	0			20	9	60	37	29.4444	19630	9541	12327	5452.78
Scaffold_776	35735	36	0.972222	10	0.277778	1	0.0277778	0	0	9	0.25	15	0.416667	1	0.0277778			39	15	2	24	11.3889	38511	26436	22993	10697.5
Scaffold_780	35663	36	0.972222	15	0.416667	0	0	0	0	11	0.305556	9	0.25	1	0.0277778			42	38	36	67	39.1667	40203	28545	23939	11167.5
Scaffold_781	35916	36	1	7	0.194444	0	0	0	0	9	0.25	20	0.555556	0	0			39	22	39	74	37.5	54113	27495	34007	15031.4
Scaffold_794	35454	36	0.972222	7	0.194444	0	0	0	0	13	0.361111	15	0.416667	1	0.0277778			33	25	15	19	16.3889	40940	19826	25189	11372.2
Scaffold_799	35688	36	1	1	0.0277778	2	0.0555556	0	0	4	0.111111	29	0.805556	0	0			28	13	14	25	14.4444	35877	19470	23647	9965.83
Scaffold_804	35595	36	0.972222	12	0.333333	1	0.0277778	1	0.0277778	5	0.138889	16	0.444444	1	0.0277778			29	10	54	30	26.1111	41277	29230	26222	11465.8
Scaffold_812	35695	36	1	4	0.111111	1	0.0277778	0	0	8	0.222222	23	0.638889	0	0			31	12	2	31	12.5	40791	20901	26908	11330.8
Scaffold_816	35989	36	1	6	0.166667	0	0	0	0	4	0.111111	26	0.722222	0	0			23	18	9	44	19.7222	49738	27690	34645	13816.1
Scaffold_823	35779	36	1	14	0.388889	0	0	0	0	7	0.194444	15	0.416667	0	0			29	28	81	20	35.8333	37487	19966	23834	10413.1
Scaffold_824	35444	36	1	11	0.305556	0	0	0	0	11	0.305556	14	0.388889	0	0			41	10	31	9	13.8889	32573	20862	19734	9048.06
Scaffold_831	35146	36	1	13	0.361111	0	0	0	0	5	0.138889	18	0.5	0	0			29	25	30	47	28.3333	42708	22113	27181	11863.3
Scaffold_860	35076	36	1	4	0.111111	0	0	0	0	3	0.0833333	29	0.805556	0	0			20	10	17	62	24.7222	24076	12665	16033	6687.78
Scaffold_864	35348	36	0.972222	9	0.25	0	0	0	0	7	0.194444	19	0.527778	1	0.0277778			34	8	36	18	17.2222	41927	20599	26206	11646.4
Scaffold_1034	34661	35	1	4	0.114286	1	0.0285714	0	0	5	0.142857	25	0.714286	0	0				18	17	25	17.1429	38842	22054	25052	11097.7
Scaffold_733	34074	35	1	10	0.285714	1	0.0285714	0	0	3	0.0857143	21	0.6	0	0			32	10	44	34	25.1429	50590	26773	33671	14454.3
Scaffold_734	34966	35	0.971429	10	0.285714	1	0.0285714	0	0	8	0.228571	15	0.428571	1	0.0285714			31	15	35	17	19.1429	36007	30502	22445	10287.7
Scaffold_768	34432	35	0.971429	10	0.285714	1	0.0285714	0	0	8	0.228571	15	0.428571	1	0.0285714			33	9	10	46	18.5714	33462	16528	25329	9560.57
Scaffold_784	34914	35	1	10	0.285714	1	0.0285714	0	0	6	0.171429	18	0.514286	0	0			25	13	25	11	14	25102	17721	15311	7172
Scaffold_787	34913	35	1	19	0.542857	3	0.0857143	0	0	5	0.142857	8	0.228571	0	0			50	6	32	10	13.7143	31504	21652	19233	9001.14
Scaffold_788	34093	35	1	7	0.2	1	0.0285714	0	0	13	0.371429	14	0.4	0	0			31	23	30	50	29.4286	41135	19651	25474	11752.9
Scaffold_796	34317	35	0.885714	17	0.485714	1	0.0285714	0	0	6	0.171429	7	0.2	4	0.114286			29	6	14	17	10.5714	21696	12630	22419	6198.86
Scaffold_801	34539	35	1	13	0.371429	2	0.0571429	0	0	12	0.342857	8	0.228571	0	0			33	8	45	66	34	43287	26709	26320	12367.7
Scaffold_802	34788	35	1	10	0.285714	0	0	0	0	3	0.0857143	22	0.628571	0	0			18	7	1	32	11.4286	29104	15926	19458	8315.43
Scaffold_809	34383	35	0.971429	13	0.371429	0	0	1	0.0285714	5	0.142857	15	0.428571	1	0.0285714			35	7	8	23	10.8571	34876	18281	24393	9964.57
Scaffold_835	34614	35	1	13	0.371429	1	0.0285714	0	0	7	0.2	14	0.4	0	0			44	31	2	12	12.8571	25945	14366	16114	7412.86
Scaffold_838	34144	35	0.942857	6	0.171429	2	0.0571429	0	0	8	0.228571	17	0.485714	2	0.0571429			39	15	26	11	14.8571	30637	14659	19519	8753.43
Scaffold_899	34419	35	1	5	0.142857	0	0	0	0	4	0.114286	26	0.742857	0	0			21	7	0	27	9.71429	44145	24013	29130	12612.9
Scaffold_905	34275	35	1	10	0.285714	0	0	0	0	4	0.114286	21	0.6	0	0			20	10	10	11	8.85714	29339	17461	20373	8382.57
Scaffold_943	34417	35	1	7	0.2	1	0.0285714	0	0	8	0.228571	19	0.542857	0	0			38	13	11	9	9.42857	29838	14746	18523	8525.14
Scaffold_1071	33323	34	1	2	0.0588235	0	0	0	0	7	0.205882	25	0.735294	0	0				9	4	6	5.58824	35160	19776	23154	10341.2
Scaffold_798	33800	34	0.970588	7	0.205882	0	0	0	0	9	0.264706	17	0.5	1	0.0294118			40	34	38	41	33.2353	53267	38301	34328	15666.8
Scaffold_803	33723	34	1	16	0.470588	0	0	0	0	3	0.0882353	15	0.441176	0	0			23	7	34	7	14.1176	30682	23082	17818	9024.12
Scaffold_805	33699	34	0.941176	10	0.294118	4	0.117647	0	0	11	0.323529	7	0.205882	2	0.0588235			43	5	6	6	5	19204	15613	16798	5648.24
Scaffold_813	33656	34	1	7	0.205882	1	0.0294118	0	0	13	0.382353	13	0.382353	0	0			42	4	2	15	6.17647	33293	17945	21410	9792.06
Scaffold_829	33770	34	1	4	0.117647	1	0.0294118	1	0.0294118	8	0.235294	20	0.588235	0	0			35	9	64	27	29.4118	34723	17543	21300	10212.6
Scaffold_840	33233	34	1	9	0.264706	0	0	1	0.0294118	3	0.0882353	21	0.617647	0	0			28	8	18	45	20.8824	36321	18236	23154	10682.6
Scaffold_845	33305	34	1	6	0.176471	0	0	0	0	3	0.0882353	25	0.735294	0	0			24	11	12	33	16.4706	35201	17636	21957	10353.2
Scaffold_853	33773	34	0.970588	9	0.264706	0	0	0	0	4	0.117647	20	0.588235	1	0.0294118			19	4	17	9	8.82353	19328	9565	12265	5684.71
Scaffold_854	33207	34	1	5	0.147059	0	0	0	0	8	0.235294	21	0.617647	0	0			39	20	9	51	23.5294	30710	15752	20482	9032.35
Scaffold_857	33142	34	0.970588	8	0.235294	4	0.117647	0	0	6	0.176471	15	0.441176	1	0.0294118			30	14	12	18	12.9412	31972	20886	20134	9403.53
Scaffold_875	33863	34	0.970588	10	0.294118	1	0.0294118	0	0	11	0.323529	11	0.323529	1	0.0294118			45	7	9	17	9.70588	25273	14645	14384	7433.24
Scaffold_902	33851	34	0.970588	10	0.294118	0	0	0	0	5	0.147059	18	0.529412	1	0.0294118			22	8	10	16	10	26353	14462	17673	7750.88
Scaffold_919	33712	34	1	7	0.205882	0	0	0	0	6	0.176471	21	0.617647	0	0			28	4	50	16	20.5882	31976	16656	20279	9404.71
Scaffold_953	33062	34	1	6	0.176471	1	0.0294118	0	0	6	0.176471	21	0.617647	0	0			17	14	16	31	17.9412	22773	12738	14277	6697.94
Scaffold_1002	32159	33	1	2	0.0606061	0	0	0	0	7	0.212121	24	0.727273	0	0				9	22	21	15.7576	22159	11148	13945	6714.85
Scaffold_719	32579	33	1	9	0.272727	0	0	0	0	10	0.30303	14	0.424242	0	0			32	8	25	32	19.697	34990	17573	26375	10603
Scaffold_811	32762	33	1	10	0.30303	0	0	1	0.030303	4	0.121212	18	0.545455	0	0			26	30	14	48	27.8788	43118	23465	29046	13066.1
Scaffold_814	32123	33	1	16	0.484848	0	0	0	0	9	0.272727	8	0.242424	0	0			37	19	0	21	12.1212	44384	37899	29650	13449.7
Scaffold_815	32899	33	1	10	0.30303	0	0	0	0	7	0.212121	16	0.484848	0	0			50	7	8	20	10.6061	49764	25818	34264	15080
Scaffold_819	32994	33	1	12	0.363636	1	0.030303	0	0	7	0.212121	13	0.393939	0	0			32	40	16	13	20.9091	32251	20458	20144	9773.03
Scaffold_820	32218	33	1	14	0.424242	3	0.0909091	0	0	6	0.181818	10	0.30303	0	0			45	8	13	10	9.39394	39089	25839	29032	11845.2
Scaffold_844	32963	33	0.969697	8	0.242424	1	0.030303	0	0	7	0.212121	16	0.484848	1	0.030303			33	4	19	23	13.9394	30035	14685	18965	9101.52
Scaffold_848	32342	33	0.969697	3	0.0909091	1	0.030303	0	0	6	0.181818	22	0.666667	1	0.030303			33	12	43	11	20	31563	22862	20145	9564.55
Scaffold_859	32914	33	1	6	0.181818	1	0.030303	0	0	8	0.242424	18	0.545455	0	0			24	6	9	40	16.6667	33460	17032	20876	10139.4
Scaffold_881	32634	33	1	2	0.0606061	0	0	0	0	9	0.272727	22	0.666667	0	0			12	6	17	9	9.69697	30442	15897	19418	9224.85
Scaffold_885	32797	33	1	5	0.151515	0	0	0	0	8	0.242424	20	0.606061	0	0			29	18	11	23	15.7576	29666	15613	19131	8989.7
Scaffold_897	32113	33	1	4	0.121212	0	0	0	0	3	0.0909091	26	0.787879	0	0			31	21	1	12	10.303	25414	13158	15631	7701.21
Scaffold_909	32769	33	1	3	0.0909091	1	0.030303	0	0	7	0.212121	22	0.666667	0	0			33	9	55	19	25.1515	43812	24980	30285	13276.4
Scaffold_926	32747	33	1	6	0.181818	2	0.0606061	0	0	4	0.121212	21	0.636364	0	0			25	6	8	13	8.18182	29482	15796	19479	8933.94
Scaffold_927	32039	33	1	5	0.151515	1	0.030303	0	0	2	0.0606061	25	0.757576	0	0			37	10	9	6	7.57576	26197	14511	17306	7938.48
Scaffold_961	32401	33	1	2	0.0606061	0	0	0	0	8	0.242424	23	0.69697	0	0			25	7	0	45	15.7576	19647	9761	12411	5953.64
Scaffold_980	32259	33	0.939394	7	0.212121	1	0.030303	0	0	10	0.30303	13	0.393939	2	0.0606061			36	18	11	23	15.7576	24726	14439	15578	7492.73
Scaffold_1008	31492	32	1	12	0.375	0	0	0	0	3	0.09375	17	0.53125	0	0				15	10	12	11.5625	24337	15653	14614	7605.31
Scaffold_770	31765	32	1	4	0.125	1	0.03125	0	0	5	0.15625	22	0.6875	0	0			24	12	11	14	11.5625	23174	11291	12578	7241.88
Scaffold_777	31597	32	0.96875	5	0.15625	0	0	0	0	6	0.1875	20	0.625	1	0.03125			20	6	3	18	8.4375	29413	16241	19953	9191.56
Scaffold_822	31682	32	1	5	0.15625	0	0	0	0	6	0.1875	21	0.65625	0	0			32	15	34	24	22.8125	31996	16426	20824	9998.75
Scaffold_825	31836	32	0.96875	8	0.25	0	0	0	0	13	0.40625	10	0.3125	1	0.03125			33	17	34	19	21.875	31280	16002	21877	9775
Scaffold_826	31836	32	0.96875	15	0.46875	2	0.0625	1	0.03125	10	0.3125	3	0.09375	1	0.03125			54	11	12	30	16.5625	34917	25204	26392	10911.6
Scaffold_827	31603	32	1	9	0.28125	1	0.03125	0	0	6	0.1875	16	0.5	0	0			50	19	42	17	24.375	42568	20939	27322	13302.5
Scaffold_830	31748	32	1	16	0.5	0	0	0	0	5	0.15625	11	0.34375	0	0			34	5	37	18	18.75	54841	43666	37092	17137.8
Scaffold_832	31779	32	1	19	0.59375	0	0	1	0.03125	5	0.15625	7	0.21875	0	0			31	10	6	9	7.8125	15874	20253	15426	4960.62
Scaffold_842	31701	32	1	6	0.1875	1	0.03125	1	0.03125	5	0.15625	19	0.59375	0	0			52	23	43	20	26.875	35704	17628	21048	11157.5
Scaffold_843	31053	32	0.9375	13	0.40625	2	0.0625	0	0	9	0.28125	6	0.1875	2	0.0625			39	7	81	22	34.375	32608	20694	21719	10190
Scaffold_849	31010	32	1	6	0.1875	1	0.03125	0	0	4	0.125	21	0.65625	0	0			45	9	21	19	15.3125	40277	21607	26802	12586.6
Scaffold_856	31204	32	0.9375	6	0.1875	2	0.0625	0	0	11	0.34375	11	0.34375	2	0.0625			39	15	11	15	12.8125	42577	21576	26533	13305.3
Scaffold_861	31294	32	0.9375	9	0.28125	1	0.03125	0	0	6	0.1875	14	0.4375	2	0.0625			33	7	55	40	31.875	37660	19461	24893	11768.8
Scaffold_866	31152	32	1	5	0.15625	1	0.03125	0	0	4	0.125	22	0.6875	0	0			20	18	4	2	7.5	13518	6887	8162	4224.38
Scaffold_867	31702	32	0.96875	5	0.15625	1	0.03125	0	0	7	0.21875	18	0.5625	1	0.03125			20	5	14	5	7.5	27142	15059	19023	8481.88
Scaffold_871	31066	32	1	11	0.34375	0	0	0	0	1	0.03125	20	0.625	0	0			26	18	0	30	15	31154	15966	19826	9735.62
Scaffold_887	31044	32	0.96875	6	0.1875	2	0.0625	0	0	2	0.0625	21	0.65625	1	0.03125			21	7	15	15	11.5625	22080	10873	14036	6900
Scaffold_889	31503	32	1	13	0.40625	0	0	0	0	4	0.125	15	0.46875	0	0			34	8	17	12	11.5625	24763	11891	14450	7738.44
Scaffold_891	31997	32	1	2	0.0625	1	0.03125	0	0	8	0.25	21	0.65625	0	0			26	14	1	56	22.1875	41723	21088	26513	13038.4
Scaffold_924	31884	32	0.96875	5	0.15625	1	0.03125	0	0	2	0.0625	23	0.71875	1	0.03125			19	9	14	18	12.8125	24056	12620	15524	7517.5
Scaffold_936	31573	32	1	9	0.28125	2	0.0625	0	0	5	0.15625	16	0.5	0	0			27	21	3	12	11.25	27658	13663	17517	8643.12
Scaffold_997	31641	32	1	8	0.25	0	0	0	0	5	0.15625	19	0.59375	0	0			29	18	25	23	20.625	27708	14921	18532	8658.75
Scaffold_742	30580	31	0.967742	15	0.483871	0	0	0	0	6	0.193548	9	0.290323	1	0.0322581			34	6	6	30	13.5484	32821	31168	21950	10587.4
Scaffold_828	30270	31	1	5	0.16129	0	0	0	0	6	0.193548	20	0.645161	0	0			48	14	27	55	30.9677	36316	19203	23765	11714.8
Scaffold_841	30758	31	1	5	0.16129	0	0	0	0	6	0.193548	20	0.645161	0	0			45	9	21	32	20	27973	13691	17021	9023.55
Scaffold_846	30107	31	1	10	0.322581	1	0.0322581	0	0	3	0.0967742	17	0.548387	0	0			26	12	19	31	20	48069	25924	32615	15506.1
Scaffold_852	30991	31	1	17	0.548387	0	0	0	0	5	0.16129	9	0.290323	0	0			34	31	26	29	27.7419	35387	27359	22195	11415.2
Scaffold_863	30566	31	1	13	0.419355	0	0	0	0	7	0.225806	11	0.354839	0	0			47	8	29	9	14.8387	37091	18868	23742	11964.8
Scaffold_883	30988	31	1	6	0.193548	2	0.0645161	0	0	6	0.193548	17	0.548387	0	0			28	13	26	24	20.3226	47533	30282	33890	15333.2
Scaffold_900	30496	31	1	8	0.258065	1	0.0322581	0	0	4	0.129032	18	0.580645	0	0			29	12	78	33	39.6774	29884	14082	17663	9640
Scaffold_922	30425	31	1	8	0.258065	0	0	0	0	4	0.129032	19	0.612903	0	0			18	13	3	12	9.03226	18961	9881	11900	6116.45
Scaffold_1007	29907	30	1	7	0.233333	1	0.0333333	0	0	3	0.1	19	0.633333	0	0				21	24	15	20	23253	11692	14493	7751
Scaffold_1163	29659	30	1	3	0.1	0	0	0	0	7	0.233333	20	0.666667	0	0				5	7	19	10.3333	13066	6866	8036	4355.33
Scaffold_1311	29379	30	1	2	0.0666667	0	0	0	0	2	0.0666667	26	0.866667	0	0				3	23	16	14	16970	9644	11585	5656.67
Scaffold_786	29771	30	1	10	0.333333	1	0.0333333	0	0	8	0.266667	11	0.366667	0	0			38	24	22	19	21.6667	29573	25027	19353	9857.67
Scaffold_800	29762	30	0.966667	7	0.233333	0	0	0	0	5	0.166667	17	0.566667	1	0.0333333			41	11	0	15	8.66667	26954	14040	19872	8984.67
Scaffold_851	29965	30	0.966667	4	0.133333	2	0.0666667	0	0	1	0.0333333	22	0.733333	1	0.0333333			47	16	24	40	26.6667	34779	17559	22107	11593
Scaffold_865	29379	30	0.966667	7	0.233333	0	0	0	0	5	0.166667	17	0.566667	1	0.0333333			23	12	16	13	13.6667	37619	19072	23059	12539.7
Scaffold_870	29705	30	1	11	0.366667	0	0	0	0	4	0.133333	15	0.5	0	0			14	8	65	34	35.6667	38262	20766	25723	12754
Scaffold_873	29647	30	1	8	0.266667	1	0.0333333	2	0.0666667	8	0.266667	11	0.366667	0	0			32	6	6	3	5	22159	19857	15251	7386.33
Scaffold_874	29660	30	1	12	0.4	1	0.0333333	0	0	4	0.133333	13	0.433333	0	0			35	19	25	32	25.3333	36146	17630	22057	12048.7
Scaffold_876	29450	30	0.966667	11	0.366667	3	0.1	0	0	6	0.2	9	0.3	1	0.0333333			31	22	37	20	26.3333	38351	19889	29743	12783.7
Scaffold_877	29007	30	1	9	0.3	0	0	0	0	7	0.233333	14	0.466667	0	0			45	16	10	16	14	35829	20156	21932	11943
Scaffold_882	29114	30	0.966667	3	0.1	1	0.0333333	0	0	5	0.166667	20	0.666667	1	0.0333333			25	9	8	15	10.6667	18313	9368	10327	6104.33
Scaffold_888	29781	30	0.966667	12	0.4	2	0.0666667	0	0	8	0.266667	7	0.233333	1	0.0333333			28	10	12	6	9.33333	29782	16034	23852	9927.33
Scaffold_890	29629	30	1	9	0.3	1	0.0333333	0	0	5	0.166667	15	0.5	0	0			35	6	0	16	7.33333	28176	21253	17744	9392
Scaffold_892	29325	30	1	13	0.433333	0	0	1	0.0333333	5	0.166667	11	0.366667	0	0			33	31	0	13	14.6667	43998	23050	27888	14666
Scaffold_893	29736	30	1	11	0.366667	3	0.1	0	0	4	0.133333	12	0.4	0	0			29	30	0	25	18.3333	36838	18209	22545	12279.3
Scaffold_896	29526	30	1	5	0.166667	1	0.0333333	0	0	10	0.333333	14	0.466667	0	0			35	10	0	26	12	29441	14326	17596	9813.67
Scaffold_907	29149	30	0.966667	5	0.166667	0	0	0	0	5	0.166667	19	0.633333	1	0.0333333			33	24	24	21	23	30240	15643	19489	10080
Scaffold_912	29348	30	1	5	0.166667	1	0.0333333	0	0	9	0.3	15	0.5	0	0			44	8	11	33	17.3333	19116	10028	11247	6372
Scaffold_913	29510	30	0.933333	5	0.166667	1	0.0333333	0	0	4	0.133333	18	0.6	2	0.0666667			33	10	16	28	18	29326	14098	17681	9775.33
Scaffold_933	29542	30	1	4	0.133333	2	0.0666667	0	0	8	0.266667	16	0.533333	0	0			20	3	27	53	27.6667	19034	9333	11734	6344.67
Scaffold_950	29155	30	1	8	0.266667	1	0.0333333	0	0	6	0.2	15	0.5	0	0			30	7	24	40	23.6667	32368	17696	21509	10789.3
Scaffold_959	29127	30	0.966667	3	0.1	0	0	0	0	4	0.133333	22	0.733333	1	0.0333333			22	11	8	5	8	16486	9134	10027	5495.33
Scaffold_972	29569	30	1	4	0.133333	0	0	0	0	8	0.266667	18	0.6	0	0			17	18	14	34	22	32685	17256	20607	10895
Scaffold_989	29289	30	1	4	0.133333	1	0.0333333	1	0.0333333	11	0.366667	13	0.433333	0	0			31	13	9	11	11	37077	21211	25901	12359
Scaffold_995	29148	30	0.966667	6	0.2	0	0	0	0	1	0.0333333	22	0.733333	1	0.0333333			19	4	7	14	8.33333	14449	7319	9225	4816.33
Scaffold_1013	28026	29	0.965517	5	0.172414	0	0	0	0	4	0.137931	19	0.655172	1	0.0344828				4	17	11	11.0345	45080	25314	30695	15544.8
Scaffold_1014	28071	29	0.965517	7	0.241379	1	0.0344828	0	0	8	0.275862	12	0.413793	1	0.0344828				17	12	14	14.8276	29126	15531	17589	10043.4
Scaffold_1044	28921	29	1	5	0.172414	0	0	0	0	4	0.137931	20	0.689655	0	0				13	16	9	13.1034	28328	14678	18103	9768.28
Scaffold_1047	28391	29	1	3	0.103448	0	0	0	0	6	0.206897	20	0.689655	0	0				5	23	17	15.5172	32403	16788	20815	11173.4
Scaffold_778	28724	29	1	8	0.275862	0	0	0	0	4	0.137931	17	0.586207	0	0			28	9	4	18	10.6897	38514	21314	26860	13280.7
Scaffold_791	28896	29	0.965517	10	0.344828	1	0.0344828	0	0	5	0.172414	12	0.413793	1	0.0344828			36	10	34	43	30	33209	16482	21310	11451.4
Scaffold_836	28114	29	1	4	0.137931	1	0.0344828	0	0	4	0.137931	20	0.689655	0	0			25	9	6	12	9.31034	22623	11261	14659	7801.03
Scaffold_858	28426	29	1	17	0.586207	0	0	0	0	8	0.275862	4	0.137931	0	0			27	8	12	3	7.93103	23842	23409	13469	8221.38
Scaffold_878	28024	29	0.965517	1	0.0344828	0	0	0	0	6	0.206897	21	0.724138	1	0.0344828			21	6	27	48	27.931	25697	13615	17844	8861.03
Scaffold_886	28320	29	1	7	0.241379	1	0.0344828	1	0.0344828	7	0.241379	13	0.448276	0	0			36	10	19	15	15.1724	40302	33467	27510	13897.2
Scaffold_903	28392	29	1	1	0.0344828	1	0.0344828	0	0	11	0.37931	16	0.551724	0	0			30	141	10	22	59.6552	41071	25319	26223	14162.4
Scaffold_915	28223	29	1	4	0.137931	0	0	0	0	5	0.172414	20	0.689655	0	0			26	8	22	26	19.3103	18126	8629	10748	6250.34
Scaffold_917	28531	29	1	4	0.137931	1	0.0344828	0	0	3	0.103448	21	0.724138	0	0			19	8	19	31	20	35711	18846	23176	12314.1
Scaffold_937	28573	29	1	1	0.0344828	0	0	0	0	5	0.172414	23	0.793103	0	0			15	16	49	26	31.3793	20563	10161	13087	7090.69
Scaffold_940	28313	29	1	6	0.206897	2	0.0689655	0	0	7	0.241379	14	0.482759	0	0			49	13	19	38	24.1379	25840	12698	15883	8910.34
Scaffold_944	28639	29	1	3	0.103448	0	0	0	0	7	0.241379	19	0.655172	0	0			20	30	27	9	22.7586	23284	11557	14340	8028.97
Scaffold_951	28769	29	0.896552	11	0.37931	0	0	1	0.0344828	8	0.275862	6	0.206897	3	0.103448			54	3	4	5	4.13793	28083	13823	16861	9683.79
Scaffold_960	28283	29	1	4	0.137931	0	0	0	0	3	0.103448	22	0.758621	0	0			18	4	0	60	22.069	19235	10252	12857	6632.76
Scaffold_962	28118	29	1	9	0.310345	1	0.0344828	0	0	6	0.206897	13	0.448276	0	0			34	22	4	80	36.5517	51605	29258	35047	17794.8
Scaffold_1000	27349	28	1	5	0.178571	0	0	0	0	4	0.142857	19	0.678571	0	0				19	14	18	18.2143	25631	13412	16286	9153.93
Scaffold_1053	27307	28	1	8	0.285714	0	0	0	0	2	0.0714286	18	0.642857	0	0				16	8	26	17.8571	20829	10464	13107	7438.93
Scaffold_837	27097	28	1	16	0.571429	0	0	1	0.0357143	4	0.142857	7	0.25	0	0			36	22	59	47	45.7143	36622	26463	22890	13079.3
Scaffold_862	27340	28	1	10	0.357143	0	0	0	0	4	0.142857	14	0.5	0	0			30	14	39	12	23.2143	28126	14246	18200	10045
Scaffold_884	27985	28	0.964286	5	0.178571	0	0	0	0	9	0.321429	13	0.464286	1	0.0357143			33	23	17	45	30.3571	24968	11643	14472	8917.14
Scaffold_894	27994	28	1	3	0.107143	2	0.0714286	0	0	5	0.178571	18	0.642857	0	0			18	4	0	8	4.28571	19867	11164	14063	7095.36
Scaffold_901	27901	28	1	10	0.357143	2	0.0714286	0	0	9	0.321429	7	0.25	0	0			41	13	10	26	17.5	27097	36097	16266	9677.5
Scaffold_904	27846	28	0.892857	17	0.607143	1	0.0357143	0	0	3	0.107143	4	0.142857	3	0.107143			37	14	4	12	10.7143	23888	19660	14575	8531.43
Scaffold_911	27177	28	0.964286	11	0.392857	0	0	0	0	8	0.285714	8	0.285714	1	0.0357143			21	9	43	40	32.8571	32486	23028	19367	11602.1
Scaffold_923	27713	28	0.964286	8	0.285714	2	0.0714286	0	0	7	0.25	10	0.357143	1	0.0357143			33	20	20	21	21.7857	28745	14536	18125	10266.1
Scaffold_931	27271	28	1	3	0.107143	1	0.0357143	0	0	7	0.25	17	0.607143	0	0			38	15	51	36	36.4286	22316	11755	12963	7970
Scaffold_932	27325	28	1	10	0.357143	3	0.107143	0	0	4	0.142857	11	0.392857	0	0			27	4	33	27	22.8571	27578	15430	34346	9849.29
Scaffold_939	27854	28	1	10	0.357143	0	0	0	0	7	0.25	11	0.392857	0	0			35	15	7	65	31.0714	54561	35377	38983	19486.1
Scaffold_942	27949	28	1	5	0.178571	0	0	0	0	4	0.142857	19	0.678571	0	0			26	14	33	20	23.9286	25974	12672	16458	9276.43
Scaffold_946	27179	28	1	9	0.321429	0	0	0	0	7	0.25	12	0.428571	0	0			31	8	22	10	14.2857	22008	19645	12944	7860
Scaffold_975	27535	28	1	7	0.25	0	0	0	0	7	0.25	14	0.5	0	0			32	12	16	55	29.6429	33989	16690	20951	12138.9
Scaffold_982	27620	28	0.928571	8	0.285714	0	0	0	0	5	0.178571	13	0.464286	2	0.0714286			41	15	34	42	32.5	34460	17335	21727	12307.1
Scaffold_986	27711	28	1	8	0.285714	0	0	0	0	5	0.178571	15	0.535714	0	0			32	16	17	12	16.0714	34995	17765	21850	12498.2
Scaffold_987	27601	28	1	6	0.214286	0	0	0	0	4	0.142857	18	0.642857	0	0			20	8	19	38	23.2143	20997	10652	13473	7498.93
Scaffold_1009	26017	27	0.962963	3	0.111111	1	0.037037	1	0.037037	4	0.148148	17	0.62963	1	0.037037				10	19	6	12.963	25949	13720	17396	9610.74
Scaffold_1027	26793	27	1	5	0.185185	0	0	0	0	4	0.148148	18	0.666667	0	0				12	21	8	15.1852	37373	21918	25836	13841.9
Scaffold_1033	26597	27	1	8	0.296296	3	0.111111	1	0.037037	6	0.222222	9	0.333333	0	0				11	20	18	18.1481	33315	16828	21438	12338.9
Scaffold_1040	26421	27	1	6	0.222222	1	0.037037	0	0	3	0.111111	17	0.62963	0	0				2	14	21	13.7037	15014	13241	9799	5560.74
Scaffold_869	26377	27	1	12	0.444444	2	0.0740741	0	0	3	0.111111	10	0.37037	0	0			26	27	55	35	43.3333	44053	22202	27478	16315.9
Scaffold_879	26052	27	1	2	0.0740741	2	0.0740741	0	0	5	0.185185	18	0.666667	0	0			20	11	15	8	12.5926	18596	9660	11644	6887.41
Scaffold_910	26180	27	1	6	0.222222	0	0	0	0	2	0.0740741	19	0.703704	0	0			23	21	143	77	89.2593	18171	9186	11434	6730
Scaffold_914	26814	27	1	5	0.185185	0	0	0	0	3	0.111111	19	0.703704	0	0			17	3	11	31	16.6667	11108	5676	6482	4114.07
Scaffold_916	26923	27	1	4	0.148148	0	0	0	0	3	0.111111	20	0.740741	0	0			22	21	22	12	20.3704	18759	9563	12156	6947.78
Scaffold_925	26190	27	1	1	0.037037	1	0.037037	0	0	1	0.037037	24	0.888889	0	0			14	6	22	9	13.7037	31187	17326	20615	11550.7
Scaffold_930	26835	27	0.925926	2	0.0740741	2	0.0740741	0	0	7	0.259259	14	0.518519	2	0.0740741			27	8	62	11	30	24691	12272	14951	9144.81
Scaffold_934	26173	27	1	5	0.185185	0	0	0	0	6	0.222222	16	0.592593	0	0			26	6	38	30	27.4074	21103	11035	13620	7815.93
Scaffold_935	26086	27	0.962963	13	0.481481	2	0.0740741	0	0	4	0.148148	7	0.259259	1	0.037037			16	5	1	13	7.03704	32010	15975	22345	11855.6
Scaffold_938	26442	27	1	5	0.185185	4	0.148148	0	0	6	0.222222	12	0.444444	0	0			30	10	1	10	7.77778	20557	10629	11650	7613.7
Scaffold_945	26182	27	1	5	0.185185	2	0.0740741	0	0	10	0.37037	10	0.37037	0	0			18	20	20	21	22.5926	39490	21144	25862	14625.9
Scaffold_947	26072	27	1	9	0.333333	0	0	1	0.037037	6	0.222222	11	0.407407	0	0			32	10	88	15	41.8519	32888	16982	21631	12180.7
Scaffold_948	26083	27	0.962963	8	0.296296	0	0	0	0	9	0.333333	9	0.333333	1	0.037037			43	5	48	25	28.8889	33477	16452	20809	12398.9
Scaffold_956	26475	27	1	6	0.222222	0	0	0	0	6	0.222222	15	0.555556	0	0			32	11	12	36	21.8519	31737	15520	18996	11754.4
Scaffold_957	26007	27	0.925926	12	0.444444	0	0	0	0	3	0.111111	10	0.37037	2	0.0740741			15	16	4	14	12.5926	19788	10115	11147	7328.89
Scaffold_958	26158	27	0.962963	4	0.148148	2	0.0740741	1	0.037037	3	0.111111	16	0.592593	1	0.037037			28	7	13	7	10	18690	9653	10604	6922.22
Scaffold_979	26936	27	1	5	0.185185	1	0.037037	0	0	6	0.222222	15	0.555556	0	0			29	12	24	21	21.1111	26026	14391	17312	9639.26
Scaffold_990	26087	27	1	11	0.407407	0	0	0	0	6	0.222222	10	0.37037	0	0			51	24	27	130	67.037	41055	20879	25548	15205.6
Scaffold_1001	25317	26	0.961538	11	0.423077	1	0.0384615	0	0	5	0.192308	8	0.307692	1	0.0384615				15	16	16	18.0769	20831	15242	13593	8011.92
Scaffold_1006	25234	26	0.961538	4	0.153846	0	0	0	0	7	0.269231	14	0.538462	1	0.0384615				5	6	7	6.92308	22113	17751	13565	8505
Scaffold_1010	25634	26	1	2	0.0769231	1	0.0384615	0	0	8	0.307692	15	0.576923	0	0				22	38	20	30.7692	28889	13864	17665	11111.2
Scaffold_1011	25532	26	1	8	0.307692	1	0.0384615	0	0	6	0.230769	11	0.423077	0	0				4	17	6	10.3846	32062	17027	20437	12331.5
Scaffold_1028	25181	26	1	15	0.576923	1	0.0384615	0	0	5	0.192308	5	0.192308	0	0				1	1	3	1.92308	23955	20093	14775	9213.46
Scaffold_1042	25603	26	1	8	0.307692	0	0	0	0	3	0.115385	15	0.576923	0	0				8	7	9	9.23077	23599	11761	14626	9076.54
Scaffold_1060	25931	26	1	3	0.115385	1	0.0384615	0	0	0	0	22	0.846154	0	0				0	3	6	3.46154	32402	18637	21031	12462.3
Scaffold_1068	25405	26	1	2	0.0769231	1	0.0384615	0	0	1	0.0384615	22	0.846154	0	0				15	9	14	14.6154	17424	9913	12030	6701.54
Scaffold_1085	25332	26	1	10	0.384615	0	0	0	0	5	0.192308	11	0.423077	0	0				18	19	25	23.8462	21801	10237	12884	8385
Scaffold_1112	25934	26	1	10	0.384615	0	0	0	0	4	0.153846	12	0.461538	0	0				14	20	29	24.2308	25207	12873	15586	9695
Scaffold_868	25706	26	1	1	0.0384615	1	0.0384615	0	0	4	0.153846	20	0.769231	0	0			13	3	9	5	6.53846	20783	12197	14410	7993.46
Scaffold_880	25115	26	0.961538	7	0.269231	1	0.0384615	0	0	6	0.230769	11	0.423077	1	0.0384615			19	27	13	16	21.5385	26071	13168	16231	10027.3
Scaffold_898	25481	26	0.961538	3	0.115385	0	0	0	0	8	0.307692	14	0.538462	1	0.0384615			27	24	0	11	13.4615	22152	11771	16304	8520
Scaffold_908	25404	26	1	6	0.230769	1	0.0384615	0	0	1	0.0384615	18	0.692308	0	0			22	21	27	22	26.9231	23801	12488	15551	9154.23
Scaffold_928	25734	26	0.961538	8	0.307692	0	0	0	0	0	0	17	0.653846	1	0.0384615			24	5	18	11	13.0769	20891	11106	13272	8035
Scaffold_941	25837	26	1	5	0.192308	0	0	0	0	5	0.192308	16	0.615385	0	0			29	8	25	41	28.4615	32567	19946	23399	12525.8
Scaffold_955	25826	26	1	5	0.192308	2	0.0769231	0	0	6	0.230769	13	0.5	0	0			32	11	30	14	21.1538	25443	19888	15646	9785.77
Scaffold_963	25522	26	1	7	0.269231	0	0	0	0	5	0.192308	14	0.538462	0	0			35	3	6	9	6.92308	29738	15379	18822	11437.7
Scaffold_964	25928	26	1	4	0.153846	2	0.0769231	1	0.0384615	4	0.153846	15	0.576923	0	0			28	23	8	28	22.6923	37947	19359	23883	14595
Scaffold_968	25879	26	0.961538	6	0.230769	0	0	0	0	2	0.0769231	17	0.653846	1	0.0384615			20	9	1	4	5.38462	20629	9972	12533	7934.23
Scaffold_969	25989	26	1	15	0.576923	1	0.0384615	0	0	5	0.192308	5	0.192308	0	0			24	11	6	2	7.30769	25446	15633	16018	9786.92
Scaffold_970	25754	26	0.961538	3	0.115385	0	0	0	0	4	0.153846	18	0.692308	1	0.0384615			18	11	23	24	22.3077	17976	9405	11816	6913.85
Scaffold_971	25065	26	0.961538	10	0.384615	0	0	1	0.0384615	3	0.115385	11	0.423077	1	0.0384615			50	14	15	35	24.6154	34219	21995	20316	13161.2
Scaffold_973	25332	26	1	15	0.576923	0	0	0	0	4	0.153846	7	0.269231	0	0			22	5	19	18	16.1538	26493	31217	16512	10189.6
Scaffold_974	25156	26	1	10	0.384615	0	0	0	0	2	0.0769231	14	0.538462	0	0			18	17	29	27	28.0769	19031	16660	11282	7319.62
Scaffold_976	26000	26	1	7	0.269231	1	0.0384615	0	0	4	0.153846	14	0.538462	0	0			26	18	19	43	30.7692	25527	12366	15807	9818.08
Scaffold_978	25673	26	1	7	0.269231	1	0.0384615	0	0	6	0.230769	12	0.461538	0	0			18	9	16	18	16.5385	20580	9609	12228	7915.38
Scaffold_981	25234	26	1	6	0.230769	0	0	0	0	3	0.115385	17	0.653846	0	0			35	5	24	32	23.4615	33931	18390	22219	13050.4
Scaffold_992	25894	26	1	6	0.230769	1	0.0384615	0	0	3	0.115385	16	0.615385	0	0			16	22	41	37	38.4615	31341	16929	21181	12054.2
Scaffold_996	25392	26	1	8	0.307692	1	0.0384615	0	0	5	0.192308	12	0.461538	0	0			21	18	20	21	22.6923	30029	18035	25223	11549.6
Scaffold_998	25299	26	1	2	0.0769231	0	0	0	0	4	0.153846	20	0.769231	0	0			25	18	43	23	32.3077	30085	15816	19697	11571.2
Scaffold_999	25099	26	1	4	0.153846	3	0.115385	0	0	6	0.230769	13	0.5	0	0			27	9	11	47	25.7692	28406	14054	17740	10925.4
Scaffold_1012	24374	25	1	5	0.2	0	0	0	0	8	0.32	12	0.48	0	0				9	19	20	19.2	17676	8843	9822	7070.4
Scaffold_1016	24465	25	1	16	0.64	0	0	0	0	4	0.16	5	0.2	0	0				3	17	8	11.2	48688	27853	34696	19475.2
Scaffold_1020	24951	25	1	5	0.2	1	0.04	0	0	1	0.04	18	0.72	0	0				1	0	8	3.6	12568	6803	7363	5027.2
Scaffold_1022	24102	25	1	10	0.4	1	0.04	2	0.08	5	0.2	7	0.28	0	0				19	26	32	30.8	30286	15328	19511	12114.4
Scaffold_1024	24217	25	1	5	0.2	2	0.08	0	0	7	0.28	11	0.44	0	0				16	44	18	31.2	22005	12505	13583	8802
Scaffold_1029	24944	25	1	12	0.48	0	0	1	0.04	3	0.12	9	0.36	0	0				11	13	32	22.4	37662	35327	24932	15064.8
Scaffold_1035	24090	25	0.96	5	0.2	0	0	0	0	6	0.24	13	0.52	1	0.04				11	17	20	19.2	30619	23511	20203	12247.6
Scaffold_1043	24264	25	1	7	0.28	0	0	0	0	7	0.28	11	0.44	0	0				5	12	6	9.2	32206	17214	20416	12882.4
Scaffold_1052	24435	25	1	10	0.4	1	0.04	0	0	1	0.04	13	0.52	0	0				7	29	20	22.4	26548	13534	17121	10619.2
Scaffold_1059	24553	25	0.96	2	0.08	0	0	0	0	2	0.08	20	0.8	1	0.04				1	10	0	4.4	16325	9480	11437	6530
Scaffold_1067	24244	25	1	12	0.48	0	0	0	0	5	0.2	8	0.32	0	0				1	6	38	18	25687	20550	18648	10274.8
Scaffold_1078	24842	25	0.96	1	0.04	0	0	0	0	3	0.12	20	0.8	1	0.04				10	18	10	15.2	20668	10447	12711	8267.2
Scaffold_1082	24034	25	1	7	0.28	3	0.12	0	0	6	0.24	9	0.36	0	0				14	8	4	10.4	18335	9192	11145	7334
Scaffold_1091	24660	25	1	5	0.2	0	0	1	0.04	4	0.16	15	0.6	0	0				11	10	8	11.6	33878	19496	23815	13551.2
Scaffold_1126	24814	25	1	2	0.08	0	0	0	0	8	0.32	15	0.6	0	0				5	5	13	9.2	19408	9129	11397	7763.2
Scaffold_1200	24604	25	1	7	0.28	0	0	0	0	3	0.12	15	0.6	0	0				6	7	8	8.4	18223	9433	11587	7289.2
Scaffold_1201	24582	25	1	4	0.16	1	0.04	0	0	1	0.04	19	0.76	0	0				9	16	8	13.2	18154	8520	10464	7261.6
Scaffold_918	24449	25	0.96	1	0.04	2	0.08	0	0	5	0.2	16	0.64	1	0.04			18	6	6	23	14	22953	11894	14778	9181.2
Scaffold_929	24808	25	1	4	0.16	2	0.08	0	0	4	0.16	15	0.6	0	0			15	6	32	10	19.2	20674	10691	13295	8269.6
Scaffold_966	24861	25	1	10	0.4	2	0.08	0	0	4	0.16	9	0.36	0	0			29	1	0	11	4.8	39649	22438	26559	15859.6
Scaffold_967	24993	25	0.96	6	0.24	2	0.08	0	0	5	0.2	11	0.44	1	0.04			22	12	0	10	8.8	16741	8427	9428	6696.4
Scaffold_977	24153	25	1	3	0.12	2	0.08	0	0	4	0.16	16	0.64	0	0			18	13	13	11	14.8	24154	12760	15817	9661.6
Scaffold_985	24763	25	1	15	0.6	1	0.04	0	0	3	0.12	6	0.24	0	0			32	15	15	16	18.4	24843	14685	15363	9937.2
Scaffold_988	24642	25	1	15	0.6	1	0.04	0	0	4	0.16	5	0.2	0	0			23	7	31	35	29.2	37236	18781	22774	14894.4
Scaffold_991	24937	25	1	5	0.2	0	0	0	0	4	0.16	16	0.64	0	0			29	19	15	30	25.6	15780	8171	9869	6312
Scaffold_993	24429	25	1	13	0.52	0	0	1	0.04	6	0.24	5	0.2	0	0			33	4	5	10	7.6	24276	12714	20173	9710.4
Scaffold_994	24126	25	0.88	10	0.4	4	0.16	0	0	5	0.2	3	0.12	3	0.12			30	18	13	15	18.4	22077	11162	13904	8830.8
Scaffold_1015	23432	24	1	5	0.208333	0	0	0	0	6	0.25	13	0.541667	0	0				7	16	15	15.8333	26607	25247	17000	11086.2
Scaffold_1017	23423	24	0.958333	8	0.333333	1	0.0416667	0	0	7	0.291667	7	0.291667	1	0.0416667				1	10	7	7.5	34365	18793	22219	14318.8
Scaffold_1018	23613	24	0.958333	1	0.0416667	0	0	0	0	2	0.0833333	20	0.833333	1	0.0416667				6	6	1	5.41667	13549	6703	8751	5645.42
Scaffold_1025	23670	24	1	5	0.208333	0	0	0	0	3	0.125	16	0.666667	0	0				6	4	6	6.66667	7207	3409	4073	3002.92
Scaffold_1026	23087	24	1	11	0.458333	1	0.0416667	0	0	2	0.0833333	10	0.416667	0	0				10	17	30	23.75	39931	21941	40407	16637.9
Scaffold_1030	23522	24	0.958333	8	0.333333	0	0	0	0	2	0.0833333	13	0.541667	1	0.0416667				6	53	13	30	23418	11060	14046	9757.5
Scaffold_1032	23538	24	1	13	0.541667	0	0	0	0	2	0.0833333	9	0.375	0	0				14	29	20	26.25	27469	13564	17493	11445.4
Scaffold_1037	23063	24	0.958333	10	0.416667	0	0	0	0	3	0.125	10	0.416667	1	0.0416667				8	28	12	20	34633	18263	22336	14430.4
Scaffold_1039	23806	24	1	2	0.0833333	0	0	0	0	6	0.25	16	0.666667	0	0				5	10	13	11.6667	17786	9923	11537	7410.83
Scaffold_1045	23267	24	1	12	0.5	1	0.0416667	0	0	6	0.25	5	0.208333	0	0				33	28	46	44.5833	46192	35621	28785	19246.7
Scaffold_1046	23021	24	1	3	0.125	0	0	0	0	4	0.166667	17	0.708333	0	0				9	13	17	16.25	25222	13158	16175	10509.2
Scaffold_1049	23851	24	1	6	0.25	0	0	0	0	9	0.375	9	0.375	0	0				5	16	13	14.1667	22193	13418	13131	9247.08
Scaffold_1056	23005	24	1	6	0.25	0	0	0	0	1	0.0416667	17	0.708333	0	0				8	18	6	13.3333	22826	11808	14398	9510.83
Scaffold_1062	23072	24	1	5	0.208333	1	0.0416667	0	0	4	0.166667	14	0.583333	0	0				9	8	13	12.5	19303	9621	12195	8042.92
Scaffold_1063	23323	24	0.875	10	0.416667	1	0.0416667	1	0.0416667	4	0.166667	5	0.208333	3	0.125				9	18	10	15.4167	24899	12580	17765	10374.6
Scaffold_1064	23009	24	1	0	0	3	0.125	0	0	2	0.0833333	19	0.791667	0	0				0	2	4	2.5	14458	8920	9985	6024.17
Scaffold_1116	23565	24	1	4	0.166667	1	0.0416667	0	0	7	0.291667	12	0.5	0	0				10	19	18	19.5833	25903	14008	16972	10792.9
Scaffold_1117	23371	24	1	8	0.333333	0	0	0	0	5	0.208333	11	0.458333	0	0				6	15	8	12.0833	22699	11221	13812	9457.92
Scaffold_1122	23270	24	1	2	0.0833333	0	0	0	0	6	0.25	16	0.666667	0	0				3	5	6	5.83333	12614	6253	7797	5255.83
Scaffold_1148	23706	24	0.958333	6	0.25	0	0	0	0	2	0.0833333	15	0.625	1	0.0416667				11	15	16	17.5	24614	12439	15200	10255.8
Scaffold_1338	23759	24	1	6	0.25	0	0	0	0	1	0.0416667	17	0.708333	0	0				5	19	11	14.5833	45387	26123	31150	18911.2
Scaffold_807	23306	24	1	6	0.25	0	0	0	0	3	0.125	15	0.625	0	0			24	12	28	11	21.25	19639	9552	11375	8182.92
Scaffold_920	23297	24	1	5	0.208333	1	0.0416667	0	0	4	0.166667	14	0.583333	0	0			20	16	35	46	40.4167	28027	14774	18925	11677.9
Scaffold_949	23768	24	1	5	0.208333	0	0	0	0	3	0.125	16	0.666667	0	0			28	14	28	15	23.75	20911	10498	12841	8712.92
Scaffold_1031	22854	23	1	6	0.26087	1	0.0434783	1	0.0434783	6	0.26087	9	0.391304	0	0				12	20	22	23.4783	26830	13211	18463	11665.2
Scaffold_1036	22595	23	0.956522	13	0.565217	0	0	0	0	5	0.217391	4	0.173913	1	0.0434783				5	2	13	8.69565	13522	11142	7339	5879.13
Scaffold_1041	22947	23	1	11	0.478261	1	0.0434783	0	0	6	0.26087	5	0.217391	0	0				4	17	15	15.6522	21986	21513	13037	9559.13
Scaffold_1048	22798	23	1	5	0.217391	0	0	0	0	2	0.0869565	16	0.695652	0	0				10	11	13	14.7826	45238	29443	33552	19668.7
Scaffold_1051	22468	23	0.956522	5	0.217391	1	0.0434783	0	0	7	0.304348	9	0.391304	1	0.0434783				3	14	3	8.69565	24790	12378	15412	10778.3
Scaffold_1054	22276	23	0.956522	8	0.347826	1	0.0434783	0	0	6	0.26087	7	0.304348	1	0.0434783				1	3	6	4.34783	9831	4899	5126	4274.35
Scaffold_1057	22224	23	1	6	0.26087	1	0.0434783	0	0	11	0.478261	5	0.217391	0	0				4	10	24	16.5217	22786	17933	13048	9906.96
Scaffold_1058	22414	23	1	4	0.173913	0	0	0	0	4	0.173913	15	0.652174	0	0				13	12	11	15.6522	22108	13303	15244	9612.17
Scaffold_1061	22398	23	1	5	0.217391	0	0	0	0	6	0.26087	12	0.521739	0	0				23	20	20	27.3913	35967	18105	23025	15637.8
Scaffold_1066	22098	23	0.956522	4	0.173913	1	0.0434783	0	0	2	0.0869565	15	0.652174	1	0.0434783				9	12	6	11.7391	15092	7256	8972	6561.74
Scaffold_1074	22350	23	1	7	0.304348	0	0	0	0	3	0.130435	13	0.565217	0	0				8	24	10	18.2609	28227	15369	18761	12272.6
Scaffold_1075	22904	23	0.956522	2	0.0869565	0	0	0	0	6	0.26087	14	0.608696	1	0.0434783				17	6	9	13.913	13993	7341	8699	6083.91
Scaffold_1076	22022	23	0.956522	6	0.26087	0	0	0	0	4	0.173913	12	0.521739	1	0.0434783				11	19	9	16.9565	15537	7824	9599	6755.22
Scaffold_1077	22307	23	0.913043	9	0.391304	1	0.0434783	0	0	3	0.130435	8	0.347826	2	0.0869565				7	16	6	12.6087	19905	11208	13524	8654.35
Scaffold_1089	22247	23	1	1	0.0434783	1	0.0434783	0	0	9	0.391304	12	0.521739	0	0				10	39	16	28.2609	30035	15369	18994	13058.7
Scaffold_1099	22408	23	1	6	0.26087	0	0	0	0	5	0.217391	12	0.521739	0	0				4	12	12	12.1739	14798	7035	8918	6433.91
Scaffold_1115	22021	23	0.956522	4	0.173913	2	0.0869565	0	0	5	0.217391	11	0.478261	1	0.0434783				9	18	17	19.1304	30330	16972	21244	13187
Scaffold_1123	22279	23	1	7	0.304348	1	0.0434783	0	0	5	0.217391	10	0.434783	0	0				13	9	18	17.3913	18994	9665	11166	8258.26
Scaffold_1142	22307	23	1	2	0.0869565	1	0.0434783	0	0	2	0.0869565	18	0.782609	0	0				4	6	5	6.52174	13673	6561	8173	5944.78
Scaffold_1150	22536	23	0.956522	3	0.130435	0	0	0	0	7	0.304348	12	0.521739	1	0.0434783				8	17	17	18.2609	31282	15989	20570	13600.9
Scaffold_1152	22349	23	1	1	0.0434783	0	0	0	0	10	0.434783	12	0.521739	0	0				13	18	17	20.8696	23729	12295	14724	10317
Scaffold_1189	22068	23	1	9	0.391304	2	0.0869565	0	0	5	0.217391	7	0.304348	0	0				14	6	20	17.3913	30341	14504	17640	13191.7
Scaffold_1192	22321	23	1	0	0	0	0	0	0	1	0.0434783	22	0.956522	0	0				2	19	10	13.4783	16859	8843	11278	7330
Scaffold_1207	22046	23	0.956522	2	0.0869565	1	0.0434783	0	0	4	0.173913	15	0.652174	1	0.0434783				10	13	6	12.6087	18613	9414	11906	8092.61
Scaffold_1285	22198	23	1	5	0.217391	0	0	0	0	2	0.0869565	16	0.695652	0	0				4	16	4	10.4348	10232	5084	6280	4448.7
Scaffold_1307	22722	23	1	6	0.26087	0	0	0	0	4	0.173913	13	0.565217	0	0				6	19	9	14.7826	18629	9391	12034	8099.57
Scaffold_834	22785	23	0.956522	12	0.521739	0	0	0	0	4	0.173913	6	0.26087	1	0.0434783			22	9	20	43	31.3043	27810	14764	18298	12091.3
Scaffold_954	22926	23	1	3	0.130435	0	0	0	0	6	0.26087	14	0.608696	0	0			22	7	4	12	10	19239	11290	13796	8364.78
Scaffold_965	22281	23	1	5	0.217391	0	0	0	0	4	0.173913	14	0.608696	0	0			16	30	0	20	21.7391	35145	17351	23057	15280.4
Scaffold_1003	21031	22	1	2	0.0909091	1	0.0454545	0	0	6	0.272727	13	0.590909	0	0				6	16	10	14.5455	19692	9439	11697	8950.91
Scaffold_1019	21951	22	1	4	0.181818	2	0.0909091	0	0	6	0.272727	10	0.454545	0	0				13	16	6	15.9091	26666	14117	17355	12120.9
Scaffold_1021	21540	22	1	5	0.227273	0	0	0	0	2	0.0909091	15	0.681818	0	0				10	5	15	13.6364	13292	7341	8801	6041.82
Scaffold_1038	21331	22	1	2	0.0909091	0	0	0	0	1	0.0454545	19	0.863636	0	0				7	4	7	8.18182	6473	3202	3770	2942.27
Scaffold_1050	21657	22	1	2	0.0909091	0	0	0	0	2	0.0909091	18	0.818182	0	0				5	5	13	10.4545	12200	5875	7417	5545.45
Scaffold_1072	21699	22	1	10	0.454545	0	0	0	0	2	0.0909091	10	0.454545	0	0				3	8	3	6.36364	17309	8719	10405	7867.73
Scaffold_1073	21684	22	0.954545	10	0.454545	0	0	0	0	5	0.227273	6	0.272727	1	0.0454545				10	15	12	16.8182	22072	11060	14884	10032.7
Scaffold_1079	21483	22	1	5	0.227273	2	0.0909091	0	0	7	0.318182	8	0.363636	0	0				5	6	15	11.8182	25547	13149	15917	11612.3
Scaffold_1080	21588	22	0.954545	10	0.454545	0	0	0	0	5	0.227273	6	0.272727	1	0.0454545				8	1	2	5	15358	13305	9701	6980.91
Scaffold_1083	21822	22	1	6	0.272727	0	0	0	0	2	0.0909091	14	0.636364	0	0				14	14	17	20.4545	22482	10801	13598	10219.1
Scaffold_1084	21922	22	0.954545	5	0.227273	0	0	0	0	2	0.0909091	14	0.636364	1	0.0454545				7	7	6	9.09091	23846	12017	14721	10839.1
Scaffold_1088	21963	22	0.954545	8	0.363636	1	0.0454545	0	0	7	0.318182	5	0.227273	1	0.0454545				23	15	31	31.3636	28793	17761	17803	13087.7
Scaffold_1090	21644	22	0.954545	7	0.318182	1	0.0454545	0	0	4	0.181818	9	0.409091	1	0.0454545				19	22	25	30	24382	12648	15931	11082.7
Scaffold_1095	21220	22	1	3	0.136364	0	0	0	0	3	0.136364	16	0.727273	0	0				3	11	1	6.81818	28562	15956	19062	12982.7
Scaffold_1098	21503	22	1	14	0.636364	0	0	1	0.0454545	4	0.181818	3	0.136364	0	0				9	12	28	22.2727	20065	16150	12810	9120.45
Scaffold_1100	21046	22	1	9	0.409091	0	0	0	0	7	0.318182	6	0.272727	0	0				5	0	9	6.36364	24045	12105	14708	10929.5
Scaffold_1101	21184	22	1	9	0.409091	0	0	0	0	2	0.0909091	11	0.5	0	0				2	5	11	8.18182	15207	7819	10024	6912.27
Scaffold_1104	21020	22	1	3	0.136364	2	0.0909091	0	0	6	0.272727	11	0.5	0	0				23	11	10	20	23747	11064	14095	10794.1
Scaffold_1110	21334	22	1	5	0.227273	0	0	0	0	3	0.136364	14	0.636364	0	0				15	12	18	20.4545	21101	10665	13636	9591.36
Scaffold_1127	21098	22	1	1	0.0454545	0	0	0	0	4	0.181818	17	0.772727	0	0				6	10	10	11.8182	27695	15478	19289	12588.6
Scaffold_1128	21793	22	0.909091	7	0.318182	0	0	0	0	6	0.272727	7	0.318182	2	0.0909091				11	19	14	20	38558	20669	24856	17526.4
Scaffold_1132	21285	22	1	1	0.0454545	0	0	0	0	3	0.136364	18	0.818182	0	0				8	5	8	9.54545	7658	4126	4730	3480.91
Scaffold_1135	21835	22	1	1	0.0454545	0	0	0	0	2	0.0909091	19	0.863636	0	0				3	4	3	4.54545	7185	3682	4630	3265.91
Scaffold_1141	21499	22	1	8	0.363636	0	0	0	0	1	0.0454545	13	0.590909	0	0				2	4	8	6.36364	20913	11540	14080	9505.91
Scaffold_1167	21368	22	1	5	0.227273	1	0.0454545	0	0	6	0.272727	10	0.454545	0	0				12	10	13	15.9091	20231	9599	11904	9195.91
Scaffold_1169	21760	22	0.954545	3	0.136364	0	0	0	0	2	0.0909091	16	0.727273	1	0.0454545				4	13	6	10.4545	17970	9005	11004	8168.18
Scaffold_1181	21440	22	1	1	0.0454545	3	0.136364	0	0	7	0.318182	11	0.5	0	0				5	3	11	8.63636	22061	11050	13378	10027.7
Scaffold_1210	21857	22	1	1	0.0454545	1	0.0454545	0	0	3	0.136364	17	0.772727	0	0				13	16	19	21.8182	21871	11150	13915	9941.36
Scaffold_1221	21850	22	1	4	0.181818	0	0	0	0	4	0.181818	14	0.636364	0	0				7	2	7	7.27273	20028	10727	13375	9103.64
Scaffold_1225	21507	22	0.954545	5	0.227273	1	0.0454545	0	0	3	0.136364	12	0.545455	1	0.0454545				17	16	28	27.7273	21384	14342	14490	9720
Scaffold_1227	21344	22	1	0	0	0	0	0	0	0	0	22	1	0	0				0	2	4	2.72727	5103	2601	3370	2319.55
Scaffold_1230	21620	22	0.954545	3	0.136364	0	0	0	0	2	0.0909091	16	0.727273	1	0.0454545				8	10	5	10.4545	17599	8928	11146	7999.55
Scaffold_1257	21801	22	0.909091	2	0.0909091	0	0	0	0	5	0.227273	13	0.590909	2	0.0909091				1	16	6	10.4545	19200	9794	12373	8727.27
Scaffold_1389	21181	22	1	6	0.272727	0	0	0	0	1	0.0454545	15	0.681818	0	0				18	20	16	24.5455	18379	10034	12164	8354.09
Scaffold_921	21288	22	1	6	0.272727	0	0	0	0	2	0.0909091	14	0.636364	0	0			16	19	8	9	16.3636	29224	15059	18418	13283.6
Scaffold_1023	20921	21	1	5	0.238095	0	0	0	0	1	0.047619	15	0.714286	0	0				12	20	13	21.4286	14441	7304	9535	6876.67
Scaffold_1055	20144	21	0.952381	6	0.285714	0	0	0	0	2	0.0952381	12	0.571429	1	0.047619				7	10	5	10.4762	18250	9463	11642	8690.48
Scaffold_1087	20987	21	1	12	0.571429	1	0.047619	0	0	4	0.190476	4	0.190476	0	0				12	15	23	23.8095	21108	18782	12112	10051.4
Scaffold_1092	20756	21	0.857143	3	0.142857	0	0	0	0	7	0.333333	8	0.380952	3	0.142857				1	0	0	0.47619	12633	6452	6925	6015.71
Scaffold_1105	20864	21	0.952381	11	0.52381	1	0.047619	0	0	2	0.0952381	6	0.285714	1	0.047619				4	7	33	20.9524	19220	19556	11200	9152.38
Scaffold_1106	20362	21	1	2	0.0952381	0	0	0	0	2	0.0952381	17	0.809524	0	0				8	14	21	20.4762	24498	14377	17059	11665.7
Scaffold_1107	20772	21	1	6	0.285714	1	0.047619	0	0	3	0.142857	11	0.52381	0	0				18	28	9	26.1905	49947	31132	35452	23784.3
Scaffold_1108	20451	21	1	9	0.428571	2	0.0952381	0	0	3	0.142857	7	0.333333	0	0				8	30	18	26.6667	28095	13897	17160	13378.6
Scaffold_1111	20508	21	1	6	0.285714	0	0	0	0	2	0.0952381	13	0.619048	0	0				11	24	12	22.381	20719	10583	13425	9866.19
Scaffold_1113	20313	21	1	6	0.285714	1	0.047619	1	0.047619	6	0.285714	7	0.333333	0	0				3	14	16	15.7143	18745	9606	11978	8926.19
Scaffold_1114	20407	21	1	13	0.619048	1	0.047619	0	0	3	0.142857	4	0.190476	0	0				3	11	16	14.2857	21019	10414	12857	10009
Scaffold_1118	20196	21	1	5	0.238095	1	0.047619	0	0	6	0.285714	9	0.428571	0	0				23	7	11	19.5238	19793	13565	11874	9425.24
Scaffold_1125	20512	21	0.952381	6	0.285714	1	0.047619	0	0	7	0.333333	6	0.285714	1	0.047619				10	9	7	12.381	23848	11476	14205	11356.2
Scaffold_1130	20097	21	0.952381	13	0.619048	1	0.047619	0	0	0	0	6	0.285714	1	0.047619				11	25	7	20.4762	24511	11656	14857	11671.9
Scaffold_1137	20437	21	1	5	0.238095	0	0	0	0	1	0.047619	15	0.714286	0	0				2	9	2	6.19048	13723	7331	9244	6534.76
Scaffold_1196	20020	21	1	6	0.285714	0	0	0	0	5	0.238095	10	0.47619	0	0				13	14	16	20.4762	22469	11111	14179	10699.5
Scaffold_1241	20333	21	0.952381	6	0.285714	2	0.0952381	0	0	7	0.333333	5	0.238095	1	0.047619				7	2	9	8.57143	22268	15860	14059	10603.8
Scaffold_1243	20922	21	1	3	0.142857	0	0	0	0	4	0.190476	14	0.666667	0	0				1	6	24	14.7619	22399	12780	15131	10666.2
Scaffold_1254	20635	21	0.952381	1	0.047619	1	0.047619	0	0	5	0.238095	13	0.619048	1	0.047619				7	11	18	17.1429	19485	9942	12486	9278.57
Scaffold_1299	20058	21	1	3	0.142857	1	0.047619	0	0	4	0.190476	13	0.619048	0	0				9	11	7	12.8571	23111	12084	14507	11005.2
Scaffold_952	20558	21	1	0	0	0	0	0	0	3	0.142857	18	0.857143	0	0			9	3	38	13	25.7143	19975	10774	13419	9511.9
Scaffold_984	20794	21	0.952381	6	0.285714	1	0.047619	0	0	3	0.142857	10	0.47619	1	0.047619			14	15	30	18	30	25376	12990	16420	12083.8
Scaffold_1065	19311	20	1	4	0.2	1	0.05	2	0.1	1	0.05	12	0.6	0	0				8	12	6	13	27340	14358	17964	13670
Scaffold_1070	19727	20	0.9	4	0.2	1	0.05	0	0	5	0.25	8	0.4	2	0.1				0	8	2	5	14993	8304	9630	7496.5
Scaffold_1081	19946	20	1	4	0.2	0	0	0	0	3	0.15	13	0.65	0	0				9	12	6	13.5	27396	15294	18805	13698
Scaffold_1097	19192	20	1	0	0	0	0	1	0.05	4	0.2	15	0.75	0	0				8	10	2	10	15156	7477	9606	7578
Scaffold_1103	19225	20	1	2	0.1	2	0.1	0	0	3	0.15	13	0.65	0	0				9	18	14	20.5	16656	9534	10663	8328
Scaffold_1109	19850	20	1	7	0.35	1	0.05	0	0	2	0.1	10	0.5	0	0				13	30	20	31.5	27224	13388	17124	13612
Scaffold_1119	19748	20	1	5	0.25	0	0	0	0	5	0.25	10	0.5	0	0				2	22	2	13	27571	15177	18978	13785.5
Scaffold_1120	19810	20	1	9	0.45	0	0	0	0	1	0.05	10	0.5	0	0				10	34	22	33	13929	7213	8580	6964.5
Scaffold_1121	19935	20	1	4	0.2	2	0.1	0	0	5	0.25	9	0.45	0	0				8	29	8	22.5	36911	18843	23645	18455.5
Scaffold_1124	19621	20	0.95	7	0.35	0	0	0	0	6	0.3	6	0.3	1	0.05				11	5	13	14.5	17437	11002	9732	8718.5
Scaffold_1129	19607	20	1	7	0.35	0	0	0	0	3	0.15	10	0.5	0	0				12	4	15	15.5	27142	13527	16594	13571
Scaffold_1131	19910	20	1	5	0.25	2	0.1	0	0	5	0.25	8	0.4	0	0				12	8	9	14.5	17487	8553	10573	8743.5
Scaffold_1133	19551	20	1	3	0.15	0	0	0	0	1	0.05	16	0.8	0	0				5	13	14	16	15241	8174	10423	7620.5
Scaffold_1134	19592	20	1	1	0.05	0	0	0	0	6	0.3	13	0.65	0	0				2	9	2	6.5	16244	8385	9989	8122
Scaffold_1136	19718	20	1	7	0.35	0	0	0	0	8	0.4	5	0.25	0	0				9	9	19	18.5	24592	11859	15098	12296
Scaffold_1138	19569	20	1	2	0.1	1	0.05	0	0	5	0.25	12	0.6	0	0				22	26	12	30	22590	11167	13894	11295
Scaffold_1139	19786	20	0.9	8	0.4	0	0	0	0	9	0.45	1	0.05	2	0.1				3	4	0	3.5	12128	5873	7799	6064
Scaffold_1140	19065	20	0.95	2	0.1	1	0.05	0	0	7	0.35	9	0.45	1	0.05				13	41	17	35.5	27362	13964	17362	13681
Scaffold_1143	19549	20	1	1	0.05	0	0	0	0	2	0.1	17	0.85	0	0				11	14	9	17	20235	11389	13650	10117.5
Scaffold_1144	19485	20	1	1	0.05	1	0.05	0	0	2	0.1	16	0.8	0	0				11	11	26	24	15098	9322	10204	7549
Scaffold_1145	19644	20	1	10	0.5	1	0.05	0	0	5	0.25	4	0.2	0	0				3	8	37	24	16885	14898	9520	8442.5
Scaffold_1146	19468	20	0.95	1	0.05	0	0	0	0	5	0.25	13	0.65	1	0.05				17	16	35	34	23367	11450	14182	11683.5
Scaffold_1147	19379	20	1	11	0.55	1	0.05	0	0	7	0.35	1	0.05	0	0				11	30	45	43	16957	16041	10932	8478.5
Scaffold_1149	19922	20	0.95	4	0.2	1	0.05	0	0	3	0.15	11	0.55	1	0.05				13	12	13	19	27250	13987	17584	13625
Scaffold_1155	19833	20	0.95	4	0.2	0	0	0	0	1	0.05	14	0.7	1	0.05				9	26	15	25	28867	16971	20895	14433.5
Scaffold_1156	19614	20	1	5	0.25	0	0	0	0	4	0.2	11	0.55	0	0				6	13	4	11.5	20901	10365	12890	10450.5
Scaffold_1157	19206	20	0.95	5	0.25	0	0	0	0	2	0.1	12	0.6	1	0.05				9	12	11	16	38598	23726	27680	19299
Scaffold_1162	19069	20	1	10	0.5	1	0.05	0	0	4	0.2	5	0.25	0	0				5	9	5	9.5	11909	14745	7042	5954.5
Scaffold_1164	19760	20	1	4	0.2	0	0	0	0	6	0.3	10	0.5	0	0				12	13	20	22.5	24867	15124	18002	12433.5
Scaffold_1168	19929	20	0.95	10	0.5	0	0	0	0	0	0	9	0.45	1	0.05				8	28	6	21	20712	10322	13276	10356
Scaffold_1170	19387	20	1	7	0.35	0	0	0	0	1	0.05	12	0.6	0	0				5	16	1	11	15277	7362	9605	7638.5
Scaffold_1171	19428	20	1	7	0.35	0	0	0	0	5	0.25	8	0.4	0	0				10	9	17	18	18062	9031	11187	9031
Scaffold_1173	19582	20	1	8	0.4	1	0.05	0	0	5	0.25	6	0.3	0	0				11	9	11	15.5	23049	12945	14493	11524.5
Scaffold_1177	19717	20	0.9	6	0.3	0	0	0	0	2	0.1	10	0.5	2	0.1				7	3	5	7.5	14207	7415	8819	7103.5
Scaffold_1183	19076	20	1	10	0.5	0	0	0	0	1	0.05	9	0.45	0	0				0	5	1	3	3139	7387	2228	1569.5
Scaffold_1184	19654	20	1	6	0.3	0	0	0	0	4	0.2	10	0.5	0	0				16	9	21	23	24453	12406	15006	12226.5
Scaffold_1185	19987	20	1	9	0.45	0	0	0	0	3	0.15	8	0.4	0	0				15	26	12	26.5	28522	14623	18224	14261
Scaffold_1191	19645	20	1	2	0.1	2	0.1	0	0	5	0.25	11	0.55	0	0				14	22	13	24.5	33437	18776	22226	16718.5
Scaffold_1205	19304	20	1	2	0.1	0	0	1	0.05	2	0.1	15	0.75	0	0				4	0	10	7	6186	3106	3482	3093
Scaffold_1209	19738	20	1	4	0.2	0	0	0	0	3	0.15	13	0.65	0	0				11	17	16	22	31798	16486	20816	15899
Scaffold_1223	19354	20	1	4	0.2	0	0	0	0	2	0.1	14	0.7	0	0				3	4	3	5	8572	4721	4920	4286
Scaffold_1272	19173	20	1	5	0.25	0	0	0	0	4	0.2	11	0.55	0	0				14	15	11	20	26191	15193	18408	13095.5
Scaffold_1318	19432	20	1	0	0	0	0	0	0	3	0.15	17	0.85	0	0				1	8	5	7	10657	5618	6899	5328.5
Scaffold_1320	19599	20	1	9	0.45	0	0	0	0	5	0.25	6	0.3	0	0				2	5	7	7	9467	4901	5540	4733.5
Scaffold_1326	19398	20	0.95	2	0.1	0	0	0	0	8	0.4	9	0.45	1	0.05				13	23	13	24.5	26983	13904	17616	13491.5
Scaffold_1005	18704	19	0.947368	2	0.105263	1	0.0526316	0	0	1	0.0526316	14	0.736842	1	0.0526316				4	3	2	4.73684	10959	5475	6705	5767.89
Scaffold_1069	18261	19	1	1	0.0526316	0	0	0	0	4	0.210526	14	0.736842	0	0				13	12	13	20	14776	7798	9988	7776.84
Scaffold_1086	18543	19	0.947368	2	0.105263	1	0.0526316	0	0	5	0.263158	10	0.526316	1	0.0526316				16	25	12	27.8947	15286	7393	9570	8045.26
Scaffold_1151	18983	19	0.894737	2	0.105263	2	0.105263	0	0	8	0.421053	5	0.263158	2	0.105263				11	15	8	17.8947	19680	9656	12130	10357.9
Scaffold_1153	18855	19	1	5	0.263158	1	0.0526316	0	0	5	0.263158	8	0.421053	0	0				15	19	18	27.3684	23253	11361	14132	12238.4
Scaffold_1154	18587	19	0.947368	3	0.157895	0	0	0	0	6	0.315789	9	0.473684	1	0.0526316				16	18	18	27.3684	23851	11321	14224	12553.2
Scaffold_1158	18542	19	1	3	0.157895	1	0.0526316	0	0	7	0.368421	8	0.421053	0	0				10	16	8	17.8947	32049	21190	23606	16867.9
Scaffold_1165	18917	19	1	6	0.315789	2	0.105263	0	0	3	0.157895	8	0.421053	0	0				9	13	19	21.5789	17662	12856	11459	9295.79
Scaffold_1172	18953	19	1	7	0.368421	0	0	0	0	4	0.210526	8	0.421053	0	0				24	16	19	31.0526	21183	16563	12794	11148.9
Scaffold_1174	18813	19	1	6	0.315789	1	0.0526316	0	0	5	0.263158	7	0.368421	0	0				16	21	7	23.1579	21880	10560	13044	11515.8
Scaffold_1175	18742	19	1	9	0.473684	0	0	0	0	3	0.157895	7	0.368421	0	0				11	22	13	24.2105	24130	12422	15589	12700
Scaffold_1178	18276	19	1	3	0.157895	0	0	0	0	6	0.315789	10	0.526316	0	0				2	8	37	24.7368	21510	12687	18369	11321.1
Scaffold_1179	18723	19	1	8	0.421053	1	0.0526316	0	0	5	0.263158	5	0.263158	0	0				5	7	13	13.1579	18420	17705	11634	9694.74
Scaffold_1180	18678	19	1	6	0.315789	2	0.105263	0	0	3	0.157895	8	0.421053	0	0				5	0	3	4.21053	8736	4180	5356	4597.89
Scaffold_1186	18874	19	1	7	0.368421	0	0	0	0	6	0.315789	6	0.315789	0	0				6	5	20	16.3158	15656	11976	12096	8240
Scaffold_1187	18460	19	1	6	0.315789	0	0	0	0	8	0.421053	5	0.263158	0	0				0	17	20	19.4737	19937	9899	20845	10493.2
Scaffold_1188	18661	19	1	14	0.736842	1	0.0526316	0	0	3	0.157895	1	0.0526316	0	0				6	21	28	28.9474	16230	23899	10327	8542.11
Scaffold_1190	18208	19	1	3	0.157895	0	0	0	0	8	0.421053	8	0.421053	0	0				17	15	16	25.2632	27105	13840	17148	14265.8
Scaffold_1193	18457	19	0.894737	15	0.789474	1	0.0526316	0	0	1	0.0526316	0	0	2	0.105263				0	1	8	4.73684	70	125	164	36.8421
Scaffold_1194	18460	19	1	2	0.105263	0	0	0	0	3	0.157895	14	0.736842	0	0				3	3	12	9.47368	20747	11466	13933	10919.5
Scaffold_1195	18436	19	0.947368	8	0.421053	0	0	0	0	3	0.157895	7	0.368421	1	0.0526316				14	18	7	20.5263	24990	12450	15611	13152.6
Scaffold_1197	18335	19	1	3	0.157895	1	0.0526316	0	0	5	0.263158	10	0.526316	0	0				5	25	9	20.5263	29238	15827	19581	15388.4
Scaffold_1212	18792	19	0.947368	1	0.0526316	1	0.0526316	0	0	2	0.105263	14	0.736842	1	0.0526316				20	16	8	23.1579	26523	14154	18241	13959.5
Scaffold_1217	18138	19	1	3	0.157895	0	0	1	0.0526316	2	0.105263	13	0.684211	0	0				3	8	1	6.31579	14064	7747	9392	7402.11
Scaffold_1218	18823	19	1	8	0.421053	1	0.0526316	0	0	1	0.0526316	9	0.473684	0	0				8	0	10	9.47368	10080	5113	5444	5305.26
Scaffold_1222	18844	19	1	5	0.263158	0	0	0	0	4	0.210526	10	0.526316	0	0				5	10	11	13.6842	20833	11795	14168	10964.7
Scaffold_1228	18700	19	1	4	0.210526	2	0.105263	0	0	1	0.0526316	12	0.631579	0	0				6	16	8	15.7895	20013	9801	12210	10533.2
Scaffold_1229	18081	19	0.894737	4	0.210526	0	0	0	0	3	0.157895	10	0.526316	2	0.105263				15	10	22	24.7368	22152	10873	13630	11658.9
Scaffold_1231	18379	19	1	1	0.0526316	0	0	0	0	1	0.0526316	17	0.894737	0	0				8	10	11	15.2632	15325	7286	9250	8065.79
Scaffold_1232	18029	19	1	4	0.210526	0	0	0	0	1	0.0526316	14	0.736842	0	0				6	16	5	14.2105	16292	8251	10150	8574.74
Scaffold_1236	18147	19	1	3	0.157895	0	0	0	0	7	0.368421	9	0.473684	0	0				12	29	8	25.7895	24115	12463	15432	12692.1
Scaffold_1242	18591	19	1	2	0.105263	0	0	0	0	3	0.157895	14	0.736842	0	0				11	5	16	16.8421	11494	6131	7622	6049.47
Scaffold_1246	18641	19	1	5	0.263158	0	0	0	0	2	0.105263	12	0.631579	0	0				19	10	15	23.1579	12153	5845	7456	6396.32
Scaffold_1247	18562	19	0.947368	2	0.105263	1	0.0526316	0	0	3	0.157895	12	0.631579	1	0.0526316				4	10	7	11.0526	9933	10407	6679	5227.89
Scaffold_1248	18670	19	0.947368	1	0.0526316	0	0	0	0	7	0.368421	10	0.526316	1	0.0526316				6	19	8	17.3684	20797	10589	13199	10945.8
Scaffold_1253	18733	19	1	5	0.263158	0	0	0	0	1	0.0526316	13	0.684211	0	0				7	17	12	18.9474	19891	10865	13621	10468.9
Scaffold_1256	18312	19	1	4	0.210526	0	0	0	0	1	0.0526316	14	0.736842	0	0				8	12	15	18.4211	14074	7290	9364	7407.37
Scaffold_1260	18730	19	1	4	0.210526	0	0	0	0	3	0.157895	12	0.631579	0	0				4	8	13	13.1579	17468	9645	11434	9193.68
Scaffold_1269	18239	19	1	3	0.157895	0	0	0	0	1	0.0526316	15	0.789474	0	0				4	11	17	16.8421	12329	6111	7963	6488.95
Scaffold_1277	18178	19	0.947368	4	0.210526	0	0	0	0	3	0.157895	11	0.578947	1	0.0526316				5	19	11	18.4211	14459	7657	9482	7610
Scaffold_1279	18408	19	1	3	0.157895	1	0.0526316	0	0	4	0.210526	11	0.578947	0	0				11	11	4	13.6842	22958	19727	14277	12083.2
Scaffold_1286	18266	19	1	2	0.105263	1	0.0526316	0	0	1	0.0526316	15	0.789474	0	0				9	0	10	10	7726	3952	4946	4066.32
Scaffold_1295	18193	19	1	2	0.105263	2	0.105263	0	0	2	0.105263	13	0.684211	0	0				4	11	10	13.1579	15884	8260	10225	8360
Scaffold_1306	18712	19	1	5	0.263158	1	0.0526316	0	0	3	0.157895	10	0.526316	0	0				7	4	12	12.1053	15130	8521	9265	7963.16
Scaffold_1315	18276	19	1	0	0	0	0	0	0	2	0.105263	17	0.894737	0	0				2	6	4	6.31579	6289	2889	3747	3310
Scaffold_1495	18926	19	0.947368	5	0.263158	0	0	0	0	3	0.157895	10	0.526316	1	0.0526316				3	17	4	12.6316	10499	4959	6341	5525.79
Scaffold_983	18890	19	1	2	0.105263	1	0.0526316	1	0.0526316	5	0.263158	10	0.526316	0	0			30	10	10	5	13.1579	25488	12960	15841	13414.7
Scaffold_1093	17846	18	1	2	0.111111	0	0	0	0	1	0.0555556	15	0.833333	0	0				13	7	9	16.1111	11430	6357	8144	6350
Scaffold_1159	17273	18	1	0	0	0	0	0	0	3	0.166667	15	0.833333	0	0				5	21	15	22.7778	23090	13032	16113	12827.8
Scaffold_1166	17627	18	1	7	0.388889	0	0	0	0	9	0.5	2	0.111111	0	0				7	5	14	14.4444	16627	10759	11012	9237.22
Scaffold_1182	17518	18	1	3	0.166667	0	0	0	0	1	0.0555556	14	0.777778	0	0				3	12	4	10.5556	21747	12353	14500	12081.7
Scaffold_1198	17964	18	1	2	0.111111	0	0	0	0	5	0.277778	11	0.611111	0	0				10	17	20	26.1111	26484	12362	15530	14713.3
Scaffold_1199	17822	18	1	3	0.166667	0	0	0	0	3	0.166667	12	0.666667	0	0				6	18	7	17.2222	20655	12019	14532	11475
Scaffold_1202	17952	18	1	1	0.0555556	0	0	0	0	2	0.111111	15	0.833333	0	0				17	11	4	17.7778	12747	6198	8185	7081.67
Scaffold_1213	17836	18	1	4	0.222222	0	0	0	0	6	0.333333	8	0.444444	0	0				2	23	10	19.4444	22449	10770	13704	12471.7
Scaffold_1214	17573	18	1	9	0.5	0	0	0	0	2	0.111111	7	0.388889	0	0				15	22	18	30.5556	34017	17650	23510	18898.3
Scaffold_1219	17481	18	1	8	0.444444	2	0.111111	0	0	7	0.388889	1	0.0555556	0	0				23	13	10	25.5556	21095	22104	12467	11719.4
Scaffold_1220	17689	18	1	8	0.444444	1	0.0555556	1	0.0555556	4	0.222222	4	0.222222	0	0				4	9	13	14.4444	19352	8833	10787	10751.1
Scaffold_1224	17521	18	1	4	0.222222	1	0.0555556	0	0	2	0.111111	11	0.611111	0	0				9	15	15	21.6667	17872	9621	11696	9928.89
Scaffold_1226	17180	18	1	1	0.0555556	0	0	0	0	6	0.333333	11	0.611111	0	0				5	10	4	10.5556	15611	8191	10029	8672.78
Scaffold_1233	17799	18	1	1	0.0555556	0	0	0	0	3	0.166667	14	0.777778	0	0				0	8	4	6.66667	8452	4332	5288	4695.56
Scaffold_1237	17217	18	0.944444	3	0.166667	2	0.111111	0	0	6	0.333333	6	0.333333	1	0.0555556				10	8	8	14.4444	20805	13964	12431	11558.3
Scaffold_1238	17419	18	1	1	0.0555556	0	0	0	0	5	0.277778	12	0.666667	0	0				17	14	16	26.1111	22980	11157	14256	12766.7
Scaffold_1239	17321	18	1	7	0.388889	1	0.0555556	0	0	2	0.111111	8	0.444444	0	0				16	16	18	27.7778	18289	8816	10982	10160.6
Scaffold_1240	17540	18	1	0	0	0	0	0	0	4	0.222222	14	0.777778	0	0				7	19	8	18.8889	11299	5798	7165	6277.22
Scaffold_1245	17090	18	1	13	0.722222	1	0.0555556	0	0	2	0.111111	2	0.111111	0	0				0	4	2	3.33333	69	141	99	38.3333
Scaffold_1250	17257	18	1	3	0.166667	1	0.0555556	0	0	2	0.111111	12	0.666667	0	0				10	14	9	18.3333	14937	8771	10308	8298.33
Scaffold_1251	17119	18	1	1	0.0555556	0	0	0	0	6	0.333333	11	0.611111	0	0				8	20	33	33.8889	22473	12133	14310	12485
Scaffold_1259	17279	18	1	0	0	0	0	0	0	4	0.222222	14	0.777778	0	0				3	1	4	4.44444	5756	3081	4206	3197.78
Scaffold_1261	17222	18	1	2	0.111111	0	0	0	0	1	0.0555556	15	0.833333	0	0				10	9	10	16.1111	5433	2895	3569	3018.33
Scaffold_1263	17094	18	1	8	0.444444	0	0	0	0	4	0.222222	6	0.333333	0	0				18	20	14	28.8889	22356	11035	14460	12420
Scaffold_1271	17774	18	1	2	0.111111	0	0	0	0	1	0.0555556	15	0.833333	0	0				4	6	0	5.55556	6589	3287	3847	3660.56
Scaffold_1273	17812	18	1	2	0.111111	1	0.0555556	0	0	2	0.111111	13	0.722222	0	0				3	18	16	20.5556	24357	13036	16224	13531.7
Scaffold_1278	17432	18	0.944444	2	0.111111	1	0.0555556	0	0	3	0.166667	11	0.611111	1	0.0555556				7	8	9	13.3333	16906	9041	13081	9392.22
Scaffold_1284	17076	18	1	4	0.222222	0	0	0	0	1	0.0555556	13	0.722222	0	0				5	13	18	20	12960	7547	9028	7200
Scaffold_1297	17410	18	1	4	0.222222	0	0	0	0	4	0.222222	10	0.555556	0	0				6	21	9	20	25922	14379	17853	14401.1
Scaffold_1303	17492	18	1	1	0.0555556	1	0.0555556	0	0	5	0.277778	11	0.611111	0	0				5	31	11	26.1111	17956	9002	11066	9975.56
Scaffold_1314	17995	18	1	1	0.0555556	0	0	0	0	5	0.277778	12	0.666667	0	0				1	29	19	27.2222	30393	17879	21159	16885
Scaffold_1321	17498	18	1	0	0	0	0	0	0	0	0	18	1	0	0				1	2	4	3.88889	5480	2699	2977	3044.44
Scaffold_1322	17262	18	1	6	0.333333	0	0	0	0	2	0.111111	10	0.555556	0	0				4	8	17	16.1111	14682	7253	9147	8156.67
Scaffold_1327	17699	18	0.944444	3	0.166667	1	0.0555556	0	0	2	0.111111	11	0.611111	1	0.0555556				13	11	8	17.7778	11765	5948	7276	6536.11
Scaffold_1342	17608	18	1	3	0.166667	0	0	0	0	5	0.277778	10	0.555556	0	0				3	19	14	20	18896	10101	12283	10497.8
Scaffold_1346	17204	18	1	5	0.277778	1	0.0555556	0	0	2	0.111111	10	0.555556	0	0				6	1	5	6.66667	6765	3442	3618	3758.33
Scaffold_1351	17675	18	0.944444	1	0.0555556	1	0.0555556	0	0	2	0.111111	13	0.722222	1	0.0555556				7	33	15	30.5556	18489	9237	11515	10271.7
Scaffold_1374	17571	18	0.944444	5	0.277778	0	0	0	0	1	0.0555556	11	0.611111	1	0.0555556				16	29	10	30.5556	18700	9255	11629	10388.9
Scaffold_1476	17477	18	1	1	0.0555556	0	0	0	0	3	0.166667	14	0.777778	0	0				6	21	9	20	25221	13496	17166	14011.7
Scaffold_1096	16146	17	1	2	0.117647	0	0	0	0	5	0.294118	10	0.588235	0	0				13	19	17	28.8235	25562	14679	17550	15036.5
Scaffold_1176	16825	17	1	1	0.0588235	0	0	0	0	0	0	16	0.941176	0	0				2	3	3	4.70588	6501	3203	3728	3824.12
Scaffold_1206	16067	17	1	3	0.176471	0	0	0	0	1	0.0588235	13	0.764706	0	0				3	1	11	8.82353	13675	7641	9103	8044.12
Scaffold_1234	16241	17	0.941176	5	0.294118	2	0.117647	0	0	2	0.117647	7	0.411765	1	0.0588235				5	0	3	4.70588	6061	3427	4163	3565.29
Scaffold_1235	16028	17	1	2	0.117647	0	0	0	0	3	0.176471	12	0.705882	0	0				2	3	14	11.1765	13583	7785	8625	7990
Scaffold_1252	16871	17	1	7	0.411765	1	0.0588235	0	0	3	0.176471	6	0.352941	0	0				15	23	16	31.7647	18432	9539	12687	10842.4
Scaffold_1255	16651	17	1	10	0.588235	1	0.0588235	0	0	2	0.117647	4	0.235294	0	0				18	6	13	21.7647	18662	9177	12220	10977.6
Scaffold_1264	16568	17	1	2	0.117647	0	0	0	0	2	0.117647	13	0.764706	0	0				6	4	3	7.64706	7078	3318	4195	4163.53
Scaffold_1266	16195	17	1	8	0.470588	0	0	0	0	2	0.117647	7	0.411765	0	0				5	25	5	20.5882	28582	16259	19583	16812.9
Scaffold_1267	16725	17	0.941176	3	0.176471	0	0	0	0	2	0.117647	11	0.647059	1	0.0588235				5	4	7	9.41176	15372	8135	10390	9042.35
Scaffold_1268	16182	17	0.941176	6	0.352941	0	0	0	0	6	0.352941	4	0.235294	1	0.0588235				37	10	17	37.6471	19121	13847	11539	11247.6
Scaffold_1275	16628	17	1	5	0.294118	0	0	0	0	4	0.235294	8	0.470588	0	0				10	12	14	21.1765	20278	10297	13001	11928.2
Scaffold_1276	16161	17	1	7	0.411765	2	0.117647	0	0	0	0	8	0.470588	0	0				13	18	15	27.0588	21161	10324	13404	12447.6
Scaffold_1281	16867	17	1	2	0.117647	0	0	0	0	3	0.176471	12	0.705882	0	0				12	11	12	20.5882	16747	8771	10922	9851.18
Scaffold_1282	16832	17	1	8	0.470588	0	0	0	0	1	0.0588235	8	0.470588	0	0				10	21	14	26.4706	34827	20496	25042	20486.5
Scaffold_1283	16099	17	1	4	0.235294	0	0	0	0	0	0	13	0.764706	0	0				5	9	15	17.0588	9468	5001	6252	5569.41
Scaffold_1287	16367	17	1	4	0.235294	0	0	0	0	2	0.117647	11	0.647059	0	0				4	5	4	7.64706	10186	4940	6531	5991.76
Scaffold_1288	16110	17	0.941176	4	0.235294	0	0	0	0	2	0.117647	10	0.588235	1	0.0588235				4	13	12	17.0588	9850	4904	6096	5794.12
Scaffold_1289	16081	17	1	2	0.117647	3	0.176471	0	0	3	0.176471	9	0.529412	0	0				5	7	7	11.1765	21496	10831	13054	12644.7
Scaffold_1290	16270	17	1	9	0.529412	1	0.0588235	0	0	4	0.235294	3	0.176471	0	0				1	4	16	12.3529	13382	11656	8839	7871.76
Scaffold_1296	16351	17	1	3	0.176471	0	0	0	0	5	0.294118	9	0.529412	0	0				18	14	14	27.0588	17440	8831	11046	10258.8
Scaffold_1301	16054	17	0.941176	2	0.117647	0	0	0	0	8	0.470588	6	0.352941	1	0.0588235				13	7	7	15.8824	14020	8174	8852	8247.06
Scaffold_1302	16617	17	0.941176	3	0.176471	0	0	0	0	2	0.117647	11	0.647059	1	0.0588235				2	9	21	18.8235	13563	6410	7672	7978.24
Scaffold_1304	16585	17	1	7	0.411765	0	0	0	0	4	0.235294	6	0.352941	0	0				1	4	0	2.94118	13209	15105	10551	7770
Scaffold_1309	16013	17	1	0	0	0	0	0	0	6	0.352941	11	0.647059	0	0				4	12	6	12.9412	17314	8650	10869	10184.7
Scaffold_1330	16641	17	1	5	0.294118	0	0	0	0	6	0.352941	6	0.352941	0	0				10	36	18	37.6471	25289	12587	16074	14875.9
Scaffold_1333	16197	17	1	6	0.352941	0	0	0	0	3	0.176471	8	0.470588	0	0				5	8	10	13.5294	22223	12301	14826	13072.4
Scaffold_1355	16019	17	1	0	0	0	0	0	0	4	0.235294	13	0.764706	0	0				12	24	26	36.4706	13861	6848	9058	8153.53
Scaffold_1356	16791	17	1	0	0	1	0.0588235	0	0	3	0.176471	13	0.764706	0	0				6	16	17	22.9412	16320	9068	11247	9600
Scaffold_1361	16154	17	1	4	0.235294	0	0	0	0	4	0.235294	9	0.529412	0	0				14	56	18	51.7647	21969	10940	14016	12922.9
Scaffold_1369	16916	17	1	4	0.235294	0	0	0	0	2	0.117647	11	0.647059	0	0				2	1	18	12.3529	9688	5022	5931	5698.82
Scaffold_1413	16581	17	1	3	0.176471	0	0	0	0	4	0.235294	10	0.588235	0	0				5	15	13	19.4118	43741	28492	32362	25730
Scaffold_1424	16161	17	1	3	0.176471	2	0.117647	0	0	2	0.117647	10	0.588235	0	0				7	33	11	30	24842	13736	16932	14612.9
Scaffold_1429	16278	17	1	5	0.294118	0	0	0	0	3	0.176471	9	0.529412	0	0				7	26	10	25.2941	21890	11436	14514	12876.5
Scaffold_1431	16276	17	0.941176	5	0.294118	0	0	0	0	2	0.117647	9	0.529412	1	0.0588235				3	10	0	7.64706	10065	5451	5776	5920.59
Scaffold_1498	16278	17	1	1	0.0588235	1	0.0588235	0	0	5	0.294118	10	0.588235	0	0				10	10	10	17.6471	15103	8030	10161	8884.12
Scaffold_1546	16014	17	1	3	0.176471	0	0	0	0	2	0.117647	12	0.705882	0	0				6	5	7	10.5882	28236	18110	20639	16609.4
Scaffold_1565	16811	17	0.941176	3	0.176471	0	0	0	0	3	0.176471	10	0.588235	1	0.0588235				5	9	13	15.8824	38828	24171	27006	22840
Scaffold_1004	15782	16	1	2	0.125	0	0	0	0	4	0.25	10	0.625	0	0	x			5	4	1	6.25	6870	3665	4634	4293.75
Scaffold_1102	15820	16	1	3	0.1875	1	0.0625	0	0	2	0.125	10	0.625	0	0				12	13	15	25	22133	11559	13938	13833.1
Scaffold_1161	15193	16	1	2	0.125	0	0	0	0	4	0.25	10	0.625	0	0				7	9	5	13.125	14233	7908	9665	8895.62
Scaffold_1215	15240	16	1	4	0.25	1	0.0625	0	0	1	0.0625	10	0.625	0	0				5	7	6	11.25	15832	7714	9591	9895
Scaffold_1291	15773	16	1	7	0.4375	0	0	0	0	2	0.125	7	0.4375	0	0				8	32	22	38.75	23786	11731	14520	14866.2
Scaffold_1298	15191	16	1	10	0.625	0	0	0	0	1	0.0625	5	0.3125	0	0				5	12	11	17.5	25638	13691	16636	16023.8
Scaffold_1305	15908	16	1	5	0.3125	1	0.0625	0	0	5	0.3125	5	0.3125	0	0				2	6	0	5	19918	10812	13133	12448.8
Scaffold_1310	15985	16	1	0	0	0	0	0	0	4	0.25	12	0.75	0	0				14	25	27	41.25	19357	9835	12583	12098.1
Scaffold_1312	15521	16	1	10	0.625	3	0.1875	0	0	2	0.125	1	0.0625	0	0				14	24	29	41.875	19309	27590	16029	12068.1
Scaffold_1313	15555	16	1	7	0.4375	0	0	0	0	7	0.4375	2	0.125	0	0				3	1	0	2.5	8574	7707	4648	5358.75
Scaffold_1316	15344	16	1	4	0.25	1	0.0625	1	0.0625	5	0.3125	5	0.3125	0	0				4	7	13	15	14927	15754	8911	9329.38
Scaffold_1319	15192	16	1	0	0	0	0	0	0	2	0.125	14	0.875	0	0				4	13	5	13.75	7525	4459	5423	4703.12
Scaffold_1323	15015	16	0.9375	2	0.125	0	0	0	0	6	0.375	7	0.4375	1	0.0625				6	27	16	30.625	22666	12095	14724	14166.2
Scaffold_1331	15350	16	0.9375	1	0.0625	0	0	0	0	1	0.0625	13	0.8125	1	0.0625				1	4	2	4.375	4256	2062	2196	2660
Scaffold_1336	15920	16	0.9375	3	0.1875	0	0	0	0	2	0.125	10	0.625	1	0.0625				6	10	8	15	19904	9945	12532	12440
Scaffold_1337	15985	16	1	5	0.3125	1	0.0625	0	0	4	0.25	6	0.375	0	0				6	6	21	20.625	14231	7231	8150	8894.38
Scaffold_1339	15184	16	1	3	0.1875	0	0	0	0	1	0.0625	12	0.75	0	0				6	11	6	14.375	14581	7416	9182	9113.12
Scaffold_1343	15164	16	0.9375	6	0.375	0	0	0	0	1	0.0625	8	0.5	1	0.0625				12	34	17	39.375	39512	27172	30315	24695
Scaffold_1354	15857	16	0.9375	3	0.1875	0	0	0	0	3	0.1875	9	0.5625	1	0.0625				13	19	15	29.375	23651	13027	16029	14781.9
Scaffold_1368	15171	16	1	4	0.25	0	0	1	0.0625	4	0.25	7	0.4375	0	0				6	15	16	23.125	18673	9234	11480	11670.6
Scaffold_1380	15175	16	1	3	0.1875	0	0	1	0.0625	3	0.1875	9	0.5625	0	0				9	17	12	23.75	16407	8250	10266	10254.4
Scaffold_1449	15750	16	0.875	0	0	1	0.0625	0	0	3	0.1875	10	0.625	2	0.125				5	14	12	19.375	18979	9086	11303	11861.9
Scaffold_1451	15454	16	1	2	0.125	0	0	0	0	2	0.125	12	0.75	0	0				7	16	12	21.875	23737	12565	15146	14835.6
Scaffold_1457	15780	16	1	2	0.125	0	0	0	0	1	0.0625	13	0.8125	0	0				3	15	0	11.25	20111	13003	14558	12569.4
Scaffold_1460	15401	16	1	0	0	0	0	0	0	1	0.0625	15	0.9375	0	0				2	9	11	13.75	17012	10240	12193	10632.5
Scaffold_1511	15077	16	1	2	0.125	0	0	0	0	4	0.25	10	0.625	0	0				8	6	21	21.875	14679	7034	8729	9174.38
Scaffold_1658	15072	16	1	2	0.125	0	0	0	0	1	0.0625	13	0.8125	0	0				3	3	3	5.625	3962	1927	2360	2476.25
Scaffold_1203	14415	15	1	1	0.0666667	0	0	0	0	2	0.133333	12	0.8	0	0				1	7	0	5.33333	7420	3906	4883	4946.67
Scaffold_1204	14502	15	0.933333	2	0.133333	2	0.133333	0	0	2	0.133333	8	0.533333	1	0.0666667				2	13	5	13.3333	13409	7140	9443	8939.33
Scaffold_1270	14792	15	1	2	0.133333	0	0	0	0	4	0.266667	9	0.6	0	0				6	3	3	8	16713	8921	10929	11142
Scaffold_1274	14487	15	1	14	0.933333	0	0	0	0	0	0	1	0.0666667	0	0				0	4	0	2.66667	2879	2203	1767	1919.33
Scaffold_1280	14788	15	1	0	0	0	0	0	0	1	0.0666667	14	0.933333	0	0				4	13	6	15.3333	10709	5719	7257	7139.33
Scaffold_1324	14018	15	1	3	0.2	0	0	0	0	2	0.133333	10	0.666667	0	0				1	7	6	9.33333	8825	4207	5296	5883.33
Scaffold_1332	14801	15	1	7	0.466667	0	0	0	0	4	0.266667	4	0.266667	0	0				3	9	17	19.3333	18365	24335	11592	12243.3
Scaffold_1334	14724	15	1	1	0.0666667	0	0	0	0	3	0.2	11	0.733333	0	0				8	13	2	15.3333	14014	7633	9525	9342.67
Scaffold_1335	14635	15	0.933333	6	0.4	0	0	0	0	4	0.266667	4	0.266667	1	0.0666667				10	5	5	13.3333	20135	10393	13407	13423.3
Scaffold_1341	14399	15	1	5	0.333333	0	0	0	0	2	0.133333	8	0.533333	0	0				9	3	18	20	8999	4539	5152	5999.33
Scaffold_1345	14381	15	0.866667	1	0.0666667	1	0.0666667	0	0	8	0.533333	3	0.2	2	0.133333				6	5	4	10	14282	6828	8322	9521.33
Scaffold_1347	14610	15	0.933333	1	0.0666667	0	0	0	0	2	0.133333	11	0.733333	1	0.0666667				6	11	17	22.6667	21460	12034	13944	14306.7
Scaffold_1348	14583	15	1	2	0.133333	1	0.0666667	0	0	7	0.466667	5	0.333333	0	0				9	15	3	18	14971	7879	9653	9980.67
Scaffold_1349	14781	15	1	1	0.0666667	0	0	0	0	3	0.2	11	0.733333	0	0				3	14	3	13.3333	14118	7739	8367	9412
Scaffold_1352	14309	15	1	8	0.533333	0	0	0	0	2	0.133333	5	0.333333	0	0				6	24	6	24	17152	13161	10494	11434.7
Scaffold_1358	14201	15	1	2	0.133333	1	0.0666667	0	0	7	0.466667	5	0.333333	0	0				14	9	9	21.3333	15687	8537	10744	10458
Scaffold_1364	14863	15	0.933333	4	0.266667	0	0	0	0	4	0.266667	6	0.4	1	0.0666667				3	5	4	8	16557	8686	10011	11038
Scaffold_1365	14798	15	1	1	0.0666667	0	0	0	0	5	0.333333	9	0.6	0	0				10	21	8	26	27349	15865	19172	18232.7
Scaffold_1366	14503	15	1	3	0.2	0	0	0	0	1	0.0666667	11	0.733333	0	0				1	2	4	4.66667	9146	4143	5035	6097.33
Scaffold_1367	14709	15	0.933333	11	0.733333	1	0.0666667	0	0	0	0	2	0.133333	1	0.0666667				4	12	20	24	13443	12641	7905	8962
Scaffold_1371	14849	15	0.933333	5	0.333333	0	0	0	0	1	0.0666667	8	0.533333	1	0.0666667				3	4	8	10	37211	29103	29352	24807.3
Scaffold_1373	14110	15	1	3	0.2	1	0.0666667	0	0	3	0.2	8	0.533333	0	0				7	15	25	31.3333	20336	13213	13663	13557.3
Scaffold_1382	14657	15	1	3	0.2	0	0	0	0	0	0	12	0.8	0	0				4	12	17	22	15160	7425	9277	10106.7
Scaffold_1385	14994	15	1	3	0.2	0	0	0	0	1	0.0666667	11	0.733333	0	0				8	18	6	21.3333	29209	16005	19964	19472.7
Scaffold_1392	14013	15	1	3	0.2	0	0	0	0	2	0.133333	10	0.666667	0	0				9	0	8	11.3333	10138	5205	6868	6758.67
Scaffold_1397	14853	15	1	2	0.133333	0	0	0	0	3	0.2	10	0.666667	0	0				17	14	7	25.3333	20252	11489	13742	13501.3
Scaffold_1407	14443	15	1	1	0.0666667	0	0	0	0	1	0.0666667	13	0.866667	0	0				4	8	4	10.6667	10772	5763	6835	7181.33
Scaffold_1412	14476	15	0.933333	3	0.2	0	0	0	0	4	0.266667	7	0.466667	1	0.0666667				6	22	8	24	19048	10087	12333	12698.7
Scaffold_1417	14905	15	1	3	0.2	0	0	0	0	1	0.0666667	11	0.733333	0	0				0	2	3	3.33333	8952	4447	5471	5968
Scaffold_1423	14270	15	1	1	0.0666667	0	0	0	0	3	0.2	11	0.733333	0	0				3	11	6	13.3333	10701	5473	6912	7134
Scaffold_1436	14158	15	1	1	0.0666667	0	0	0	0	1	0.0666667	13	0.866667	0	0				0	11	2	8.66667	19249	11233	13480	12832.7
Scaffold_1478	14707	15	1	1	0.0666667	0	0	0	0	1	0.0666667	13	0.866667	0	0				5	18	10	22	23576	13476	16573	15717.3
Scaffold_1490	14120	15	1	2	0.133333	0	0	0	0	1	0.0666667	12	0.8	0	0				4	41	17	41.3333	8490	5429	6234	5660
Scaffold_1494	14084	15	1	2	0.133333	0	0	0	0	4	0.266667	9	0.6	0	0				6	10	4	13.3333	20408	13231	15121	13605.3
Scaffold_1517	14885	15	1	3	0.2	0	0	0	0	5	0.333333	7	0.466667	0	0				6	10	3	12.6667	14973	7686	9488	9982
Scaffold_1556	14108	15	1	3	0.2	0	0	0	0	2	0.133333	10	0.666667	0	0				4	8	7	12.6667	23226	13819	16331	15484
Scaffold_1608	14699	15	1	5	0.333333	0	0	0	0	4	0.266667	6	0.4	0	0				4	10	0	9.33333	9957	4760	6078	6638
Scaffold_1631	14698	15	1	4	0.266667	0	0	0	0	3	0.2	8	0.533333	0	0				8	18	7	22	15861	8025	10484	10574
Scaffold_1781	14456	15	1	3	0.2	0	0	0	0	3	0.2	9	0.6	0	0				3	0	1	2.66667	13310	8111	8838	8873.33
Scaffold_1094	13718	14	1	2	0.142857	0	0	0	0	1	0.0714286	11	0.785714	0	0				1	8	2	7.85714	10337	5832	7041	7383.57
Scaffold_1160	13464	14	1	1	0.0714286	0	0	0	0	5	0.357143	8	0.571429	0	0				3	4	7	10	17400	9597	11736	12428.6
Scaffold_1211	13680	14	0.928571	0	0	0	0	0	0	2	0.142857	11	0.785714	1	0.0714286				4	8	6	12.8571	10902	5648	7121	7787.14
Scaffold_1216	13535	14	1	2	0.142857	0	0	0	0	0	0	12	0.857143	0	0				3	8	5	11.4286	6484	3230	4215	4631.43
Scaffold_1249	13414	14	1	2	0.142857	0	0	0	0	1	0.0714286	11	0.785714	0	0				3	3	9	10.7143	10391	5219	6380	7422.14
Scaffold_1262	13364	14	1	0	0	0	0	0	0	1	0.0714286	13	0.928571	0	0	x			1	0	6	5	6036	2878	3685	4311.43
Scaffold_1293	13440	14	1	3	0.214286	1	0.0714286	0	0	1	0.0714286	9	0.642857	0	0				2	2	5	6.42857	10750	5651	6665	7678.57
Scaffold_1294	13920	14	1	3	0.214286	0	0	0	0	1	0.0714286	10	0.714286	0	0				4	3	2	6.42857	5507	2961	3617	3933.57
Scaffold_1328	13441	14	1	0	0	3	0.214286	0	0	3	0.214286	8	0.571429	0	0				16	14	18	34.2857	14757	7322	9208	10540.7
Scaffold_1329	13977	14	1	2	0.142857	0	0	0	0	2	0.142857	10	0.714286	0	0				1	19	7	19.2857	25518	13445	16854	18227.1
Scaffold_1340	13750	14	1	0	0	2	0.142857	0	0	2	0.142857	10	0.714286	0	0				2	1	9	8.57143	3290	1587	1998	2350
Scaffold_1350	13960	14	1	2	0.142857	1	0.0714286	0	0	4	0.285714	7	0.5	0	0				20	12	26	41.4286	17902	8946	10924	12787.1
Scaffold_1353	13764	14	1	3	0.214286	0	0	0	0	3	0.214286	8	0.571429	0	0				20	6	25	36.4286	16195	7942	10037	11567.9
Scaffold_1359	13943	14	1	8	0.571429	1	0.0714286	0	0	5	0.357143	0	0	0	0				6	7	4	12.1429	10550	11112	6392	7535.71
Scaffold_1360	13285	14	1	2	0.142857	0	0	0	0	5	0.357143	7	0.5	0	0				7	2	17	18.5714	15262	7524	9145	10901.4
Scaffold_1362	13458	14	1	4	0.285714	1	0.0714286	0	0	2	0.142857	7	0.5	0	0				8	17	6	22.1429	11320	5654	7589	8085.71
Scaffold_1363	13821	14	1	6	0.428571	1	0.0714286	0	0	1	0.0714286	6	0.428571	0	0				21	17	15	37.8571	24332	12787	15923	17380
Scaffold_1370	13328	14	1	7	0.5	1	0.0714286	0	0	2	0.142857	4	0.285714	0	0				8	17	4	20.7143	16882	8197	9535	12058.6
Scaffold_1372	13389	14	1	1	0.0714286	1	0.0714286	0	0	7	0.5	5	0.357143	0	0				46	17	8	50.7143	14580	22413	9651	10414.3
Scaffold_1375	13312	14	1	5	0.357143	0	0	0	0	3	0.214286	6	0.428571	0	0				18	19	22	42.1429	17231	8336	10379	12307.9
Scaffold_1376	13178	14	1	3	0.214286	0	0	0	0	3	0.214286	8	0.571429	0	0	x			4	3	3	7.14286	11481	5731	7871	8200.71
Scaffold_1377	13643	14	1	0	0	1	0.0714286	0	0	4	0.285714	9	0.642857	0	0				7	13	6	18.5714	18094	9703	11840	12924.3
Scaffold_1379	13298	14	0.928571	6	0.428571	0	0	0	0	5	0.357143	2	0.142857	1	0.0714286				2	23	5	21.4286	6748	3576	7813	4820
Scaffold_1381	13298	14	0.928571	6	0.428571	2	0.142857	0	0	5	0.357143	0	0	1	0.0714286				8	13	13	24.2857	14779	11855	9051	10556.4
Scaffold_1383	13100	14	1	4	0.285714	0	0	0	0	2	0.142857	8	0.571429	0	0				13	23	12	34.2857	16742	8019	9981	11958.6
Scaffold_1386	13222	14	1	3	0.214286	0	0	0	0	5	0.357143	6	0.428571	0	0				2	10	3	10.7143	16219	9443	10905	11585
Scaffold_1387	13236	14	1	4	0.285714	0	0	0	0	2	0.142857	8	0.571429	0	0				9	8	12	20.7143	18050	8719	10661	12892.9
Scaffold_1388	13848	14	0.928571	2	0.142857	2	0.142857	0	0	4	0.285714	5	0.357143	1	0.0714286				1	5	3	6.42857	15072	8391	9707	10765.7
Scaffold_1390	13076	14	1	13	0.928571	0	0	0	0	0	0	1	0.0714286	0	0				0	24	7	22.1429	90981	112070	174036	64986.4
Scaffold_1395	13775	14	1	0	0	0	0	0	0	2	0.142857	12	0.857143	0	0				1	6	5	8.57143	7827	3745	4925	5590.71
Scaffold_1396	13160	14	1	4	0.285714	0	0	1	0.0714286	5	0.357143	4	0.285714	0	0				5	17	9	22.1429	16100	7985	10127	11500
Scaffold_1398	13649	14	1	3	0.214286	0	0	0	0	2	0.142857	9	0.642857	0	0				18	8	10	25.7143	23277	13504	16476	16626.4
Scaffold_1408	13024	14	1	2	0.142857	0	0	0	0	3	0.214286	9	0.642857	0	0				7	3	3	9.28571	9106	4441	4694	6504.29
Scaffold_1410	13363	14	1	1	0.0714286	1	0.0714286	0	0	0	0	12	0.857143	0	0				0	15	7	15.7143	11726	6195	8021	8375.71
Scaffold_1418	13137	14	0.857143	7	0.5	0	0	0	0	1	0.0714286	4	0.285714	2	0.142857				11	14	7	22.8571	20102	10206	12846	14358.6
Scaffold_1437	13805	14	1	4	0.285714	0	0	0	0	4	0.285714	6	0.428571	0	0				6	11	4	15	15261	7905	9929	10900.7
Scaffold_1438	13157	14	0.928571	4	0.285714	4	0.285714	0	0	1	0.0714286	4	0.285714	1	0.0714286				4	8	9	15	10804	5441	6982	7717.14
Scaffold_1441	13622	14	1	1	0.0714286	0	0	0	0	1	0.0714286	12	0.857143	0	0				5	5	5	10.7143	11807	5597	7374	8433.57
Scaffold_1509	13508	14	1	1	0.0714286	0	0	0	0	2	0.142857	11	0.785714	0	0				6	11	7	17.1429	16106	8351	10325	11504.3
Scaffold_1541	13916	14	1	2	0.142857	0	0	0	0	3	0.214286	9	0.642857	0	0				3	11	7	15	8644	4526	5196	6174.29
Scaffold_1580	13503	14	1	4	0.285714	0	0	0	0	4	0.285714	6	0.428571	0	0				5	7	4	11.4286	12734	6240	8161	9095.71
Scaffold_1651	13994	14	1	6	0.428571	0	0	0	0	0	0	8	0.571429	0	0				4	8	23	25	12190	6313	7716	8707.14
Scaffold_1258	12952	13	1	3	0.230769	0	0	0	0	2	0.153846	8	0.615385	0	0				4	4	1	6.92308	11826	6013	7536	9096.92
Scaffold_1292	12953	13	1	2	0.153846	0	0	0	0	2	0.153846	9	0.692308	0	0				0	2	9	8.46154	7990	4097	5041	6146.15
Scaffold_1300	12310	13	0.923077	3	0.230769	0	0	0	0	0	0	9	0.692308	1	0.0769231				1	4	2	5.38462	5416	2605	3284	4166.15
Scaffold_1344	12337	13	1	1	0.0769231	1	0.0769231	0	0	0	0	11	0.846154	0	0	x			4	0	3	5.38462	6188	3018	3867	4760
Scaffold_1357	12702	13	0.923077	0	0	0	0	0	0	1	0.0769231	11	0.846154	1	0.0769231				1	13	2	12.3077	7392	3778	4713	5686.15
Scaffold_1378	12972	13	1	2	0.153846	0	0	0	0	4	0.307692	7	0.538462	0	0				10	19	28	43.8462	17569	8471	10674	13514.6
Scaffold_1384	12856	13	1	1	0.0769231	0	0	0	0	5	0.384615	7	0.538462	0	0				4	14	11	22.3077	23542	12371	15920	18109.2
Scaffold_1391	12958	13	1	2	0.153846	0	0	0	0	3	0.230769	8	0.615385	0	0				6	0	8	10.7692	16344	7825	9778	12572.3
Scaffold_1399	12545	13	1	5	0.384615	1	0.0769231	0	0	4	0.307692	3	0.230769	0	0				10	4	6	15.3846	10647	10542	6900	8190
Scaffold_1401	12659	13	1	3	0.230769	1	0.0769231	0	0	2	0.153846	7	0.538462	0	0				6	2	3	8.46154	16948	8362	10685	13036.9
Scaffold_1403	12504	13	0.923077	2	0.153846	0	0	0	0	5	0.384615	5	0.384615	1	0.0769231				5	6	14	19.2308	18690	9121	11603	14376.9
Scaffold_1404	12673	13	1	11	0.846154	0	0	0	0	0	0	2	0.153846	0	0				0	0	0	0	100	150	104	76.9231
Scaffold_1405	12659	13	1	7	0.538462	0	0	0	0	0	0	6	0.461538	0	0				2	8	6	12.3077	7774	3889	4862	5980
Scaffold_1411	12773	13	1	3	0.230769	0	0	0	0	2	0.153846	8	0.615385	0	0				5	3	3	8.46154	9689	5043	5984	7453.08
Scaffold_1415	12440	13	1	2	0.153846	0	0	0	0	1	0.0769231	10	0.769231	0	0				4	10	9	17.6923	17842	9868	12790	13724.6
Scaffold_1416	12351	13	1	5	0.384615	0	0	0	0	3	0.230769	5	0.384615	0	0				9	16	14	30	18502	9113	11683	14232.3
Scaffold_1419	12498	13	1	0	0	1	0.0769231	0	0	5	0.384615	7	0.538462	0	0				3	3	8	10.7692	12568	6594	7514	9667.69
Scaffold_1420	12511	13	1	2	0.153846	0	0	0	0	4	0.307692	7	0.538462	0	0				11	18	16	34.6154	15194	7625	9548	11687.7
Scaffold_1425	12489	13	1	2	0.153846	0	0	0	0	2	0.153846	9	0.692308	0	0				9	10	11	23.0769	16145	7759	10073	12419.2
Scaffold_1426	12505	13	0.923077	0	0	0	0	0	0	2	0.153846	10	0.769231	1	0.0769231				12	2	3	13.0769	8791	4211	5178	6762.31
Scaffold_1427	12273	13	1	5	0.384615	0	0	1	0.0769231	4	0.307692	3	0.230769	0	0				16	14	14	33.8462	14575	7270	8446	11211.5
Scaffold_1428	12843	13	1	4	0.307692	0	0	0	0	1	0.0769231	8	0.615385	0	0				9	10	19	29.2308	19606	11824	14294	15081.5
Scaffold_1430	12890	13	1	4	0.307692	0	0	0	0	5	0.384615	4	0.307692	0	0				3	35	10	36.9231	18056	9105	11125	13889.2
Scaffold_1433	12372	13	1	1	0.0769231	0	0	0	0	1	0.0769231	11	0.846154	0	0				5	15	4	18.4615	7362	4107	4969	5663.08
Scaffold_1434	12532	13	1	4	0.307692	1	0.0769231	0	0	0	0	8	0.615385	0	0				7	15	13	26.9231	19577	12129	14039	15059.2
Scaffold_1435	12164	13	1	1	0.0769231	0	0	0	0	5	0.384615	7	0.538462	0	0				6	17	7	23.0769	15360	7396	9288	11815.4
Scaffold_1440	12214	13	1	1	0.0769231	0	0	0	0	5	0.384615	7	0.538462	0	0				7	12	5	18.4615	10189	4830	6161	7837.69
Scaffold_1442	12401	13	1	2	0.153846	0	0	0	0	7	0.538462	4	0.307692	0	0				10	7	12	22.3077	17230	8434	10316	13253.8
Scaffold_1443	12711	13	0.923077	5	0.384615	0	0	0	0	0	0	7	0.538462	1	0.0769231				1	1	3	3.84615	7143	4452	5048	5494.62
Scaffold_1444	12293	13	0.923077	0	0	0	0	0	0	1	0.0769231	11	0.846154	1	0.0769231				2	9	6	13.0769	9245	5191	6487	7111.54
Scaffold_1445	12694	13	1	6	0.461538	0	0	0	0	3	0.230769	4	0.307692	0	0				18	26	24	52.3077	13495	6853	8742	10380.8
Scaffold_1447	12721	13	1	0	0	0	0	0	0	4	0.307692	9	0.692308	0	0				1	5	10	12.3077	23135	15259	17186	17796.2
Scaffold_1448	12037	13	1	3	0.230769	1	0.0769231	0	0	1	0.0769231	8	0.615385	0	0				5	18	4	20.7692	11777	5947	7736	9059.23
Scaffold_1450	12366	13	1	2	0.153846	0	0	0	0	4	0.307692	7	0.538462	0	0				10	8	11	22.3077	12614	6000	7382	9703.08
Scaffold_1452	12223	13	1	1	0.0769231	0	0	1	0.0769231	2	0.153846	9	0.692308	0	0	x			6	11	2	14.6154	11761	6291	8039	9046.92
Scaffold_1453	12179	13	0.923077	0	0	2	0.153846	0	0	5	0.384615	5	0.384615	1	0.0769231				4	7	5	12.3077	31077	17954	21196	23905.4
Scaffold_1454	12468	13	1	1	0.0769231	0	0	0	0	2	0.153846	10	0.769231	0	0				1	1	4	4.61538	6179	3351	4246	4753.08
Scaffold_1455	12181	13	1	6	0.461538	0	0	0	0	4	0.307692	3	0.230769	0	0				8	11	28	36.1538	24096	13894	17696	18535.4
Scaffold_1459	12565	13	1	1	0.0769231	0	0	1	0.0769231	1	0.0769231	10	0.769231	0	0				5	15	10	23.0769	4931	2427	3046	3793.08
Scaffold_1461	12611	13	1	2	0.153846	1	0.0769231	0	0	2	0.153846	8	0.615385	0	0				8	14	4	20	18392	9560	12379	14147.7
Scaffold_1462	12705	13	1	1	0.0769231	0	0	0	0	1	0.0769231	11	0.846154	0	0				5	1	1	5.38462	14101	6852	8353	10846.9
Scaffold_1464	12235	13	1	3	0.230769	1	0.0769231	0	0	6	0.461538	3	0.230769	0	0				6	13	6	19.2308	13847	6774	8579	10651.5
Scaffold_1468	12708	13	1	0	0	1	0.0769231	0	0	1	0.0769231	11	0.846154	0	0				5	7	5	13.0769	6641	3617	4681	5108.46
Scaffold_1469	12152	13	1	4	0.307692	0	0	0	0	1	0.0769231	8	0.615385	0	0				48	12	5	50	15801	8253	10031	12154.6
Scaffold_1479	12055	13	1	2	0.153846	1	0.0769231	0	0	1	0.0769231	9	0.692308	0	0				1	5	3	6.92308	7291	3551	4501	5608.46
Scaffold_1484	12040	13	1	2	0.153846	0	0	0	0	1	0.0769231	10	0.769231	0	0				5	1	4	7.69231	8752	4827	5679	6732.31
Scaffold_1486	12115	13	0.923077	2	0.153846	0	0	0	0	5	0.384615	5	0.384615	1	0.0769231				3	36	18	43.8462	17806	9055	11377	13696.9
Scaffold_1487	12106	13	1	3	0.230769	0	0	0	0	5	0.384615	5	0.384615	0	0				7	6	3	12.3077	14179	7961	9988	10906.9
Scaffold_1488	12047	13	0.923077	0	0	0	0	0	0	2	0.153846	10	0.769231	1	0.0769231				8	9	4	16.1538	16656	8887	10852	12812.3
Scaffold_1492	12142	13	1	0	0	0	0	0	0	0	0	13	1	0	0				6	12	17	26.9231	12957	6572	8713	9966.92
Scaffold_1501	12017	13	1	0	0	0	0	0	0	0	0	13	1	0	0				6	12	21	30	9211	4429	5668	7085.38
Scaffold_1506	12622	13	1	2	0.153846	1	0.0769231	1	0.0769231	2	0.153846	7	0.538462	0	0				7	5	5	13.0769	10571	5371	6659	8131.54
Scaffold_1520	12001	13	1	4	0.307692	0	0	0	0	2	0.153846	7	0.538462	0	0				12	21	11	33.8462	9900	6015	8094	7615.38
Scaffold_1527	12285	13	0.923077	1	0.0769231	0	0	0	0	2	0.153846	9	0.692308	1	0.0769231				3	5	3	8.46154	11092	6241	7809	8532.31
Scaffold_1530	12595	13	1	2	0.153846	0	0	0	0	3	0.230769	8	0.615385	0	0				1	6	6	10	10952	5531	6786	8424.62
Scaffold_1531	12435	13	1	0	0	0	0	0	0	2	0.153846	11	0.846154	0	0				1	5	4	7.69231	6796	3397	3886	5227.69
Scaffold_1544	12158	13	1	0	0	0	0	0	0	4	0.307692	9	0.692308	0	0				3	9	3	11.5385	13675	6458	7882	10519.2
Scaffold_1549	12246	13	1	2	0.153846	1	0.0769231	0	0	1	0.0769231	9	0.692308	0	0				3	5	2	7.69231	7560	4182	5138	5815.38
Scaffold_1557	12407	13	1	3	0.230769	0	0	0	0	2	0.153846	8	0.615385	0	0				5	19	6	23.0769	17007	10047	12145	13082.3
Scaffold_1558	12329	13	1	1	0.0769231	0	0	0	0	0	0	12	0.923077	0	0				4	8	4	12.3077	6569	2959	3653	5053.08
Scaffold_1569	12241	13	0.923077	4	0.307692	0	0	0	0	2	0.153846	6	0.461538	1	0.0769231				3	2	2	5.38462	5694	3037	3378	4380
Scaffold_1593	12693	13	1	6	0.461538	0	0	0	0	2	0.153846	5	0.384615	0	0				9	9	7	19.2308	22320	11982	14635	17169.2
Scaffold_1849	12145	13	1	4	0.307692	0	0	0	0	3	0.230769	6	0.461538	0	0				6	12	57	57.6923	8659	4364	5515	6660.77
Scaffold_1244	11043	12	1	6	0.5	0	0	0	0	1	0.0833333	5	0.416667	0	0				7	22	4	27.5	10079	5422	6465	8399.17
Scaffold_1265	11767	12	1	3	0.25	0	0	0	0	2	0.166667	7	0.583333	0	0				2	8	1	9.16667	4844	2394	2948	4036.67
Scaffold_1317	11845	12	1	2	0.166667	0	0	0	0	3	0.25	7	0.583333	0	0	x			0	1	15	13.3333	7792	4638	5528	6493.33
Scaffold_1393	11540	12	0.916667	8	0.666667	0	0	0	0	3	0.25	0	0	1	0.0833333				5	0	8	10.8333	23477	12227	14650	19564.2
Scaffold_1394	11369	12	1	0	0	0	0	0	0	1	0.0833333	11	0.916667	0	0				0	2	0	1.66667	4022	1934	2322	3351.67
Scaffold_1402	11072	12	1	1	0.0833333	0	0	0	0	4	0.333333	7	0.583333	0	0				5	14	9	23.3333	6428	3437	4355	5356.67
Scaffold_1409	11992	12	1	2	0.166667	0	0	0	0	2	0.166667	8	0.666667	0	0				14	4	17	29.1667	12929	6521	8088	10774.2
Scaffold_1422	11555	12	0.916667	5	0.416667	3	0.25	0	0	0	0	3	0.25	1	0.0833333				7	11	3	17.5	4356	2384	3128	3630
Scaffold_1446	11931	12	1	1	0.0833333	0	0	1	0.0833333	1	0.0833333	9	0.75	0	0	x	x		0	7	8	12.5	5744	3082	3826	4786.67
Scaffold_1466	11637	12	1	1	0.0833333	1	0.0833333	0	0	2	0.166667	8	0.666667	0	0	x			2	4	11	14.1667	6817	3348	4159	5680.83
Scaffold_1472	11823	12	1	5	0.416667	0	0	0	0	6	0.5	1	0.0833333	0	0				3	3	22	23.3333	24604	14463	15868	20503.3
Scaffold_1473	11661	12	1	5	0.416667	0	0	0	0	2	0.166667	5	0.416667	0	0				14	15	18	39.1667	15620	7909	10259	13016.7
Scaffold_1475	11412	12	1	1	0.0833333	1	0.0833333	0	0	0	0	10	0.833333	0	0				8	32	9	40.8333	10703	5183	6459	8919.17
Scaffold_1480	11126	12	1	0	0	0	0	0	0	3	0.25	9	0.75	0	0				6	24	15	37.5	16606	8754	10843	13838.3
Scaffold_1481	11117	12	1	5	0.416667	0	0	0	0	2	0.166667	5	0.416667	0	0				0	1	0	0.833333	3443	1959	2229	2869.17
Scaffold_1482	11715	12	1	3	0.25	0	0	0	0	2	0.166667	7	0.583333	0	0				2	3	2	5.83333	7650	3806	4621	6375
Scaffold_1489	11538	12	1	2	0.166667	0	0	0	0	2	0.166667	8	0.666667	0	0				9	10	7	21.6667	14170	7130	9449	11808.3
Scaffold_1491	11713	12	1	4	0.333333	0	0	0	0	3	0.25	5	0.416667	0	0				9	21	19	40.8333	11192	5575	6700	9326.67
Scaffold_1496	11296	12	1	5	0.416667	0	0	0	0	0	0	7	0.583333	0	0				6	6	7	15.8333	9089	4892	5962	7574.17
Scaffold_1507	11195	12	1	2	0.166667	0	0	0	0	5	0.416667	5	0.416667	0	0				11	13	15	32.5	13413	6956	8766	11177.5
Scaffold_1510	11338	12	1	6	0.5	1	0.0833333	0	0	1	0.0833333	4	0.333333	0	0				1	6	1	6.66667	7298	5058	7710	6081.67
Scaffold_1512	11332	12	1	5	0.416667	0	0	0	0	2	0.166667	5	0.416667	0	0				4	14	2	16.6667	16214	8294	10566	13511.7
Scaffold_1515	11433	12	1	3	0.25	1	0.0833333	0	0	2	0.166667	6	0.5	0	0				4	5	2	9.16667	8191	3754	4850	6825.83
Scaffold_1518	11115	12	1	4	0.333333	0	0	0	0	0	0	8	0.666667	0	0				8	8	9	20.8333	14714	7115	8739	12261.7
Scaffold_1521	11705	12	1	3	0.25	0	0	0	0	0	0	9	0.75	0	0				7	12	5	20	14493	7219	9401	12077.5
Scaffold_1523	11540	12	1	1	0.0833333	0	0	0	0	3	0.25	8	0.666667	0	0				4	17	3	20	9453	4921	5725	7877.5
Scaffold_1524	11403	12	0.916667	4	0.333333	1	0.0833333	0	0	2	0.166667	4	0.333333	1	0.0833333				10	10	12	26.6667	12499	6176	7729	10415.8
Scaffold_1525	11611	12	1	5	0.416667	0	0	0	0	0	0	7	0.583333	0	0				2	12	11	20.8333	11969	6849	8352	9974.17
Scaffold_1526	11336	12	1	3	0.25	0	0	0	0	4	0.333333	5	0.416667	0	0				6	10	26	35	25707	14896	18074	21422.5
Scaffold_1529	11100	12	1	4	0.333333	1	0.0833333	0	0	4	0.333333	3	0.25	0	0				8	2	16	21.6667	9522	5298	13629	7935
Scaffold_1533	11415	12	0.916667	1	0.0833333	0	0	0	0	2	0.166667	8	0.666667	1	0.0833333				1	20	15	30	8933	4403	5526	7444.17
Scaffold_1534	11987	12	1	3	0.25	0	0	0	0	2	0.166667	7	0.583333	0	0				6	14	9	24.1667	11511	5758	7124	9592.5
Scaffold_1535	11202	12	1	0	0	0	0	0	0	7	0.583333	5	0.416667	0	0				8	4	13	20.8333	11688	5604	7038	9740
Scaffold_1538	11169	12	0.75	3	0.25	0	0	0	0	5	0.416667	1	0.0833333	3	0.25				4	10	1	12.5	9355	8282	18578	7795.83
Scaffold_1539	11120	12	1	2	0.166667	0	0	0	0	2	0.166667	8	0.666667	0	0				8	12	27	39.1667	20856	12200	15077	17380
Scaffold_1540	11523	12	1	1	0.0833333	0	0	0	0	3	0.25	8	0.666667	0	0				6	11	4	17.5	17066	8983	10768	14221.7
Scaffold_1553	11195	12	1	0	0	0	0	0	0	2	0.166667	10	0.833333	0	0				0	1	0	0.833333	4719	2552	2888	3932.5
Scaffold_1563	11265	12	1	1	0.0833333	0	0	0	0	3	0.25	8	0.666667	0	0				2	24	15	34.1667	9900	4764	5868	8250
Scaffold_1567	11241	12	1	0	0	0	0	0	0	4	0.333333	8	0.666667	0	0				6	0	3	7.5	9713	4949	5742	8094.17
Scaffold_1583	11270	12	1	1	0.0833333	0	0	0	0	4	0.333333	7	0.583333	0	0				7	17	4	23.3333	35132	28673	28753	29276.7
Scaffold_1584	11605	12	1	3	0.25	0	0	0	0	5	0.416667	4	0.333333	0	0				11	69	7	72.5	9496	4859	6497	7913.33
Scaffold_1596	11121	12	1	2	0.166667	0	0	0	0	2	0.166667	8	0.666667	0	0				4	5	1	8.33333	9856	5758	6865	8213.33
Scaffold_1655	11478	12	1	5	0.416667	0	0	0	0	3	0.25	4	0.333333	0	0				1	5	0	5	4726	2408	2804	3938.33
Scaffold_1662	11683	12	0.916667	1	0.0833333	1	0.0833333	0	0	2	0.166667	7	0.583333	1	0.0833333				0	11	7	15	10679	5417	6822	8899.17
Scaffold_1670	11778	12	1	1	0.0833333	0	0	1	0.0833333	3	0.25	7	0.583333	0	0				5	59	7	59.1667	15667	8928	10376	13055.8
Scaffold_1765	11773	12	1	1	0.0833333	0	0	0	0	6	0.5	5	0.416667	0	0				1	5	0	5	6181	3067	3343	5150.83
Scaffold_1325	10690	11	1	2	0.181818	0	0	0	0	1	0.0909091	8	0.727273	0	0	x	x		0	3	0	2.72727	4090	1903	2476	3718.18
Scaffold_1400	10762	11	1	7	0.636364	0	0	0	0	1	0.0909091	3	0.272727	0	0				0	0	1	0.909091	1171	674	845	1064.55
Scaffold_1421	10287	11	1	3	0.272727	1	0.0909091	0	0	0	0	7	0.636364	0	0				4	11	7	20	12369	6372	8218	11244.5
Scaffold_1439	10195	11	0.818182	5	0.454545	0	0	0	0	2	0.181818	2	0.181818	2	0.181818				3	1	5	8.18182	2698	2583	2176	2452.73
Scaffold_1467	10486	11	1	1	0.0909091	0	0	0	0	4	0.363636	6	0.545455	0	0				5	13	10	25.4545	9545	4670	6225	8677.27
Scaffold_1474	10314	11	1	1	0.0909091	0	0	0	0	4	0.363636	6	0.545455	0	0				1	1	2	3.63636	4452	2104	2743	4047.27
Scaffold_1477	10574	11	1	0	0	1	0.0909091	0	0	4	0.363636	6	0.545455	0	0				5	9	1	13.6364	8568	4451	5717	7789.09
Scaffold_1513	10462	11	1	0	0	1	0.0909091	0	0	1	0.0909091	9	0.818182	0	0				4	8	4	14.5455	7062	3566	4506	6420
Scaffold_1528	10298	11	1	5	0.454545	0	0	0	0	2	0.181818	4	0.363636	0	0				9	8	0	15.4545	5156	2669	2992	4687.27
Scaffold_1543	10507	11	1	2	0.181818	0	0	0	0	0	0	9	0.818182	0	0				2	3	4	8.18182	11326	6318	7661	10296.4
Scaffold_1550	10988	11	1	6	0.545455	0	0	0	0	1	0.0909091	4	0.363636	0	0				7	6	13	23.6364	8851	4419	5660	8046.36
Scaffold_1551	10406	11	1	3	0.272727	0	0	0	0	0	0	8	0.727273	0	0				2	14	13	26.3636	8460	4534	5609	7690.91
Scaffold_1560	10812	11	1	4	0.363636	0	0	0	0	4	0.363636	3	0.272727	0	0				4	7	1	10.9091	14978	7832	9785	13616.4
Scaffold_1561	10632	11	1	0	0	0	0	0	0	4	0.363636	7	0.636364	0	0				3	7	4	12.7273	60081	46448	49851	54619.1
Scaffold_1566	10771	11	1	2	0.181818	0	0	0	0	6	0.545455	3	0.272727	0	0				4	0	0	3.63636	15713	8705	10100	14284.5
Scaffold_1568	10778	11	0.909091	4	0.363636	0	0	0	0	6	0.545455	0	0	1	0.0909091				5	1	5	10	8542	5061	6062	7765.45
Scaffold_1570	10408	11	1	7	0.636364	0	0	0	0	1	0.0909091	3	0.272727	0	0				26	12	12	45.4545	56977	49105	49911	51797.3
Scaffold_1571	10707	11	1	11	1	0	0	0	0	0	0	0	0	0	0				0	27	21	43.6364	110565	135960	211157	100514
Scaffold_1572	10685	11	1	1	0.0909091	2	0.181818	0	0	2	0.181818	6	0.545455	0	0				9	8	5	20	13278	6373	8109	12070.9
Scaffold_1573	10439	11	1	2	0.181818	0	0	0	0	2	0.181818	7	0.636364	0	0				2	6	1	8.18182	7599	3645	4615	6908.18
Scaffold_1574	10488	11	1	3	0.272727	0	0	0	0	3	0.272727	5	0.454545	0	0				1	3	6	9.09091	9460	4929	5452	8600
Scaffold_1576	10634	11	1	11	1	0	0	0	0	0	0	0	0	0	0				3	13	17	30	11696	14021	32877	10632.7
Scaffold_1577	10328	11	0.909091	4	0.363636	0	0	0	0	1	0.0909091	5	0.454545	1	0.0909091				7	14	4	22.7273	14151	7052	9219	12864.5
Scaffold_1578	10405	11	1	3	0.272727	0	0	0	0	3	0.272727	5	0.454545	0	0				18	0	8	23.6364	16023	8201	9735	14566.4
Scaffold_1579	10570	11	1	11	1	0	0	0	0	0	0	0	0	0	0				1	8	14	20.9091	94985	121730	191448	86350
Scaffold_1581	10264	11	1	2	0.181818	0	0	0	0	5	0.454545	4	0.363636	0	0				1	9	5	13.6364	11413	5800	7246	10375.5
Scaffold_1582	10537	11	1	0	0	0	0	0	0	2	0.181818	9	0.818182	0	0				2	2	6	9.09091	4131	2032	2511	3755.45
Scaffold_1585	10980	11	1	1	0.0909091	0	0	0	0	5	0.454545	5	0.454545	0	0				7	6	16	26.3636	12900	6538	7892	11727.3
Scaffold_1586	10568	11	1	1	0.0909091	0	0	0	0	2	0.181818	8	0.727273	0	0				7	4	14	22.7273	14728	9842	10660	13389.1
Scaffold_1587	10288	11	1	0	0	0	0	0	0	1	0.0909091	10	0.909091	0	0				4	13	3	18.1818	8627	4378	5563	7842.73
Scaffold_1589	10432	11	1	3	0.272727	0	0	0	0	1	0.0909091	7	0.636364	0	0				5	9	3	15.4545	7833	3957	5089	7120.91
Scaffold_1600	10196	11	1	1	0.0909091	0	0	0	0	1	0.0909091	9	0.818182	0	0	x			2	41	14	51.8182	7553	4380	5077	6866.36
Scaffold_1602	10312	11	1	4	0.363636	0	0	0	0	0	0	7	0.636364	0	0				5	10	27	38.1818	10622	5507	6847	9656.36
Scaffold_1612	10912	11	1	1	0.0909091	0	0	0	0	4	0.363636	6	0.545455	0	0				7	5	1	11.8182	7455	3728	4475	6777.27
Scaffold_1616	10782	11	1	2	0.181818	0	0	0	0	1	0.0909091	8	0.727273	0	0				2	2	13	15.4545	8279	4040	5122	7526.36
Scaffold_1632	10780	11	0.909091	1	0.0909091	0	0	0	0	0	0	9	0.818182	1	0.0909091				0	3	6	8.18182	7046	3380	4509	6405.45
Scaffold_1638	10151	11	1	2	0.181818	1	0.0909091	0	0	5	0.454545	3	0.272727	0	0				12	4	0	14.5455	11814	15892	7685	10740
Scaffold_1669	10756	11	1	0	0	0	0	0	0	2	0.181818	9	0.818182	0	0				4	17	3	21.8182	8715	4770	5995	7922.73
Scaffold_1677	10662	11	1	2	0.181818	0	0	0	0	0	0	9	0.818182	0	0				3	8	7	16.3636	8725	4305	5366	7931.82
Scaffold_1682	10835	11	1	0	0	0	0	0	0	1	0.0909091	10	0.909091	0	0				0	0	0	0	3202	1878	2114	2910.91
Scaffold_1694	10133	11	1	3	0.272727	1	0.0909091	0	0	3	0.272727	4	0.363636	0	0				2	11	4	15.4545	12681	6234	7534	11528.2
Scaffold_1701	10222	11	1	4	0.363636	0	0	0	0	2	0.181818	5	0.454545	0	0				7	1	3	10	14606	8829	9854	13278.2
Scaffold_1736	10359	11	1	4	0.363636	0	0	0	0	0	0	7	0.636364	0	0				10	16	6	29.0909	11740	5876	7499	10672.7
Scaffold_1821	10756	11	1	1	0.0909091	0	0	0	0	2	0.181818	8	0.727273	0	0				11	10	6	24.5455	11203	5632	6998	10184.5
Scaffold_1834	10079	11	1	0	0	0	0	0	0	2	0.181818	9	0.818182	0	0				1	19	7	24.5455	31100	22406	24990	28272.7
Scaffold_1838	10091	11	0.909091	2	0.181818	0	0	0	0	0	0	8	0.727273	1	0.0909091				0	0	0	0	2209	1360	1576	2008.18
Scaffold_1456	9966	10	1	0	0	0	0	0	0	0	0	10	1	0	0				4	6	5	15	8169	4183	5376	8169
Scaffold_1463	9081	10	1	3	0.3	0	0	0	0	0	0	7	0.7	0	0				7	3	3	13	8059	3924	4859	8059
Scaffold_1465	9161	10	1	2	0.2	1	0.1	0	0	2	0.2	5	0.5	0	0				6	4	0	10	9089	5543	6294	9089
Scaffold_1499	9448	10	1	2	0.2	0	0	0	0	0	0	8	0.8	0	0				7	4	6	17	7529	3724	5004	7529
Scaffold_1505	9479	10	1	2	0.2	0	0	0	0	0	0	8	0.8	0	0				1	55	6	62	7011	3728	4723	7011
Scaffold_1522	9467	10	1	3	0.3	0	0	1	0.1	0	0	6	0.6	0	0				0	6	0	6	3325	1804	2176	3325
Scaffold_1542	9631	10	1	1	0.1	0	0	0	0	1	0.1	8	0.8	0	0				8	7	5	20	12615	6696	8410	12615
Scaffold_1547	9414	10	1	2	0.2	0	0	0	0	2	0.2	6	0.6	0	0				1	1	1	3	7852	4997	5680	7852
Scaffold_1548	9059	10	0.9	6	0.6	0	0	0	0	0	0	3	0.3	1	0.1				16	0	2	18	1702	1027	1361	1702
Scaffold_1559	9517	10	1	0	0	0	0	0	0	4	0.4	6	0.6	0	0				17	13	10	40	8282	4626	5468	8282
Scaffold_1590	9812	10	1	3	0.3	1	0.1	0	0	3	0.3	3	0.3	0	0				13	10	3	26	10912	5478	7234	10912
Scaffold_1591	9860	10	1	0	0	1	0.1	0	0	3	0.3	6	0.6	0	0				5	9	9	23	13849	6967	8588	13849
Scaffold_1592	9098	10	0.9	0	0	0	0	0	0	3	0.3	6	0.6	1	0.1				4	0	4	8	8317	4401	5375	8317
Scaffold_1594	9882	10	0.9	5	0.5	0	0	0	0	4	0.4	0	0	1	0.1				4	6	9	19	15782	7925	9990	15782
Scaffold_1595	9909	10	1	6	0.6	0	0	0	0	4	0.4	0	0	0	0				0	1	1	2	7203	4845	3845	7203
Scaffold_1597	9852	10	1	5	0.5	0	0	0	0	2	0.2	3	0.3	0	0				7	22	42	71	13986	7043	9147	13986
Scaffold_1599	9734	10	1	2	0.2	0	0	0	0	6	0.6	2	0.2	0	0				7	5	9	21	12122	5553	7058	12122
Scaffold_1601	9867	10	1	5	0.5	0	0	0	0	1	0.1	4	0.4	0	0				13	13	11	37	9995	11215	6555	9995
Scaffold_1603	9631	10	1	2	0.2	1	0.1	1	0.1	6	0.6	0	0	0	0				4	0	1	5	7738	3768	5479	7738
Scaffold_1605	9452	10	1	0	0	0	0	0	0	5	0.5	5	0.5	0	0				1	0	2	3	4166	2159	2502	4166
Scaffold_1606	9547	10	1	9	0.9	0	0	0	0	1	0.1	0	0	0	0				0	22	15	37	65933	82804	128520	65933
Scaffold_1607	9884	10	0.9	3	0.3	1	0.1	0	0	1	0.1	4	0.4	1	0.1				5	5	0	10	3248	1627	2058	3248
Scaffold_1609	9610	10	1	4	0.4	1	0.1	0	0	2	0.2	3	0.3	0	0				11	25	5	41	14803	7458	11408	14803
Scaffold_1610	9374	10	1	2	0.2	1	0.1	0	0	1	0.1	6	0.6	0	0				1	1	0	2	4438	2054	2655	4438
Scaffold_1611	9377	10	1	6	0.6	0	0	0	0	3	0.3	1	0.1	0	0				2	0	0	2	8114	4623	17252	8114
Scaffold_1614	9089	10	1	6	0.6	1	0.1	0	0	2	0.2	1	0.1	0	0				0	11	13	24	9794	12470	7791	9794
Scaffold_1615	9119	10	1	4	0.4	0	0	0	0	1	0.1	5	0.5	0	0				12	17	14	43	11863	12997	7372	11863
Scaffold_1618	9483	10	1	2	0.2	0	0	0	0	2	0.2	6	0.6	0	0				2	0	2	4	9426	4581	5277	9426
Scaffold_1619	9216	10	0.9	1	0.1	0	0	0	0	3	0.3	5	0.5	1	0.1				1	1	0	2	6410	3451	4020	6410
Scaffold_1624	9478	10	0.9	0	0	0	0	0	0	1	0.1	8	0.8	1	0.1				8	1	1	10	6335	3231	3679	6335
Scaffold_1629	9799	10	0.9	1	0.1	0	0	0	0	2	0.2	6	0.6	1	0.1				0	32	0	32	14115	8668	10049	14115
Scaffold_1633	9397	10	1	0	0	1	0.1	0	0	4	0.4	5	0.5	0	0				10	4	6	20	6921	3458	4533	6921
Scaffold_1647	9787	10	1	1	0.1	0	0	0	0	3	0.3	6	0.6	0	0				8	12	13	33	12832	6352	7625	12832
Scaffold_1671	9824	10	1	0	0	1	0.1	0	0	1	0.1	8	0.8	0	0				4	19	8	31	12556	6783	8599	12556
Scaffold_1690	9968	10	1	2	0.2	0	0	0	0	4	0.4	4	0.4	0	0				4	6	15	25	8079	6064	5043	8079
Scaffold_1696	9786	10	1	2	0.2	0	0	0	0	0	0	8	0.8	0	0				3	0	6	9	7960	4480	5576	7960
Scaffold_1719	9916	10	1	0	0	2	0.2	0	0	1	0.1	7	0.7	0	0	x			2	9	2	13	7600	4680	5317	7600
Scaffold_1734	9508	10	0.9	1	0.1	1	0.1	0	0	2	0.2	5	0.5	1	0.1				5	4	5	14	11706	5592	6933	11706
Scaffold_1758	9935	10	0.9	3	0.3	0	0	0	0	2	0.2	4	0.4	1	0.1				6	18	9	33	34119	22065	25637	34119
Scaffold_1406	8679	9	0.888889	0	0	0	0	0	0	2	0.222222	6	0.666667	1	0.111111				0	12	2	15.5556	8891	4631	5760	9878.89
Scaffold_1414	8786	9	1	1	0.111111	0	0	0	0	1	0.111111	7	0.777778	0	0				4	4	2	11.1111	9435	4593	5704	10483.3
Scaffold_1432	8065	9	1	1	0.111111	0	0	0	0	2	0.222222	6	0.666667	0	0				1	28	13	46.6667	14155	8295	9385	15727.8
Scaffold_1483	8798	9	1	4	0.444444	0	0	0	0	0	0	5	0.555556	0	0				2	6	4	13.3333	9515	4931	6247	10572.2
Scaffold_1493	8105	9	1	1	0.111111	0	0	0	0	2	0.222222	6	0.666667	0	0				0	0	1	1.11111	2588	1257	1607	2875.56
Scaffold_1497	8436	9	1	4	0.444444	0	0	0	0	0	0	5	0.555556	0	0	x	x		2	6	2	11.1111	3613	1925	2329	4014.44
Scaffold_1500	8581	9	0.888889	0	0	0	0	0	0	1	0.111111	7	0.777778	1	0.111111				0	0	5	5.55556	2913	1279	5604	3236.67
Scaffold_1514	8922	9	1	3	0.333333	0	0	0	0	1	0.111111	5	0.555556	0	0				1	1	2	4.44444	5658	3017	3822	6286.67
Scaffold_1516	8300	9	1	2	0.222222	0	0	0	0	1	0.111111	6	0.666667	0	0				2	1	7	11.1111	3637	1794	2368	4041.11
Scaffold_1554	8590	9	1	1	0.111111	0	0	0	0	3	0.333333	5	0.555556	0	0	x			0	0	0	0	1769	771	1601	1965.56
Scaffold_1555	8642	9	1	0	0	0	0	0	0	4	0.444444	5	0.555556	0	0				0	0	0	0	1121	474	942	1245.56
Scaffold_1613	8896	9	1	4	0.444444	0	0	0	0	4	0.444444	1	0.111111	0	0				3	4	15	24.4444	8615	3767	4488	9572.22
Scaffold_1617	8910	9	0.888889	1	0.111111	0	0	0	0	2	0.222222	5	0.555556	1	0.111111				6	1	10	18.8889	12133	5817	7480	13481.1
Scaffold_1620	8772	9	1	8	0.888889	0	0	0	0	1	0.111111	0	0	0	0				0	2	7	10	3245	13308	4465	3605.56
Scaffold_1621	8667	9	1	1	0.111111	1	0.111111	0	0	5	0.555556	2	0.222222	0	0				3	6	7	17.7778	7399	3730	4532	8221.11
Scaffold_1622	8759	9	0.888889	3	0.333333	0	0	0	0	0	0	5	0.555556	1	0.111111				4	14	4	24.4444	8101	3968	5066	9001.11
Scaffold_1623	8825	9	1	1	0.111111	1	0.111111	0	0	3	0.333333	4	0.444444	0	0				12	3	5	22.2222	9935	4925	6167	11038.9
Scaffold_1625	8675	9	1	4	0.444444	0	0	0	0	2	0.222222	3	0.333333	0	0				9	6	16	34.4444	11452	5541	6910	12724.4
Scaffold_1626	8674	9	1	0	0	0	0	0	0	4	0.444444	5	0.555556	0	0				10	3	14	30	7145	3488	4168	7938.89
Scaffold_1628	8595	9	1	9	1	0	0	0	0	0	0	0	0	0	0				0	30	17	52.2222	36866	46861	79426	40962.2
Scaffold_1630	8925	9	1	1	0.111111	0	0	0	0	1	0.111111	7	0.777778	0	0				2	2	14	20	6365	3300	4225	7072.22
Scaffold_1634	8367	9	1	1	0.111111	0	0	0	0	0	0	8	0.888889	0	0				1	5	3	10	6571	4037	4555	7301.11
Scaffold_1635	8179	9	1	3	0.333333	0	0	0	0	1	0.111111	5	0.555556	0	0				8	5	1	15.5556	6815	3465	3694	7572.22
Scaffold_1636	8331	9	0.888889	1	0.111111	0	0	1	0.111111	0	0	6	0.666667	1	0.111111				4	0	8	13.3333	9727	5658	6999	10807.8
Scaffold_1637	8433	9	1	8	0.888889	0	0	0	0	0	0	1	0.111111	0	0				0	26	12	42.2222	87172	105780	166442	96857.8
Scaffold_1639	8260	9	1	6	0.666667	0	0	0	0	1	0.111111	2	0.222222	0	0				1	1	0	2.22222	5309	2770	3734	5898.89
Scaffold_1640	8253	9	1	5	0.555556	1	0.111111	0	0	1	0.111111	2	0.222222	0	0				7	14	17	42.2222	12016	5886	7369	13351.1
Scaffold_1641	8323	9	1	9	1	0	0	0	0	0	0	0	0	0	0				0	25	11	40	24108	29672	50212	26786.7
Scaffold_1642	8358	9	1	3	0.333333	0	0	0	0	0	0	6	0.666667	0	0				2	12	0	15.5556	7165	3518	4565	7961.11
Scaffold_1643	8230	9	1	3	0.333333	0	0	0	0	5	0.555556	1	0.111111	0	0				0	4	0	4.44444	5305	3962	3381	5894.44
Scaffold_1644	8142	9	1	1	0.111111	0	0	0	0	5	0.555556	3	0.333333	0	0				0	0	0	0	1738	899	985	1931.11
Scaffold_1645	8102	9	1	2	0.222222	0	0	0	0	1	0.111111	6	0.666667	0	0				3	7	2	13.3333	12360	6385	8207	13733.3
Scaffold_1646	8265	9	0.888889	3	0.333333	0	0	0	0	1	0.111111	4	0.444444	1	0.111111				2	7	0	10	3384	4172	2274	3760
Scaffold_1649	8055	9	1	8	0.888889	0	0	0	0	0	0	1	0.111111	0	0				1	0	7	8.88889	41071	51014	85334	45634.4
Scaffold_1650	8248	9	0.888889	1	0.111111	1	0.111111	0	0	3	0.333333	3	0.333333	1	0.111111				0	3	3	6.66667	6866	3080	3366	7628.89
Scaffold_1652	8142	9	1	0	0	0	0	0	0	4	0.444444	5	0.555556	0	0				2	6	8	17.7778	7006	3366	4062	7784.44
Scaffold_1653	8081	9	1	3	0.333333	2	0.222222	0	0	2	0.222222	2	0.222222	0	0				7	9	12	31.1111	10497	5065	6204	11663.3
Scaffold_1657	8446	9	0.888889	2	0.222222	0	0	0	0	4	0.444444	2	0.222222	1	0.111111				0	41	4	50	6411	3594	5704	7123.33
Scaffold_1663	8668	9	1	3	0.333333	0	0	0	0	1	0.111111	5	0.555556	0	0				8	3	10	23.3333	16301	8632	11024	18112.2
Scaffold_1668	8470	9	1	4	0.444444	0	0	0	0	0	0	5	0.555556	0	0				5	11	6	24.4444	10773	5570	7010	11970
Scaffold_1689	8706	9	1	3	0.333333	1	0.111111	0	0	4	0.444444	1	0.111111	0	0				1	6	3	11.1111	8076	3695	4689	8973.33
Scaffold_1693	8477	9	1	1	0.111111	0	0	0	0	3	0.333333	5	0.555556	0	0				3	10	4	18.8889	6000	2873	3426	6666.67
Scaffold_1699	8018	9	1	1	0.111111	0	0	0	0	0	0	8	0.888889	0	0				9	13	12	37.7778	11349	5953	7929	12610
Scaffold_1704	8174	9	1	4	0.444444	0	0	0	0	0	0	5	0.555556	0	0				5	16	2	25.5556	16189	9313	11344	17987.8
Scaffold_1710	8771	9	1	2	0.222222	1	0.111111	0	0	0	0	6	0.666667	0	0	x			2	9	24	38.8889	7713	3954	5046	8570
Scaffold_1711	8633	9	1	0	0	0	0	0	0	2	0.222222	7	0.777778	0	0				2	15	7	26.6667	9961	5153	6105	11067.8
Scaffold_1714	8495	9	1	1	0.111111	0	0	0	0	4	0.444444	4	0.444444	0	0				4	56	9	76.6667	14135	13806	9008	15705.6
Scaffold_1721	8509	9	1	3	0.333333	0	0	0	0	0	0	6	0.666667	0	0	x			3	7	8	20	8680	4192	5441	9644.44
Scaffold_1775	8387	9	1	4	0.444444	0	0	1	0.111111	0	0	4	0.444444	0	0				1	17	0	20	14443	7535	9480	16047.8
Scaffold_1780	8208	9	1	2	0.222222	0	0	0	0	2	0.222222	5	0.555556	0	0				0	0	1	1.11111	2598	1264	1421	2886.67
Scaffold_1920	8527	9	1	2	0.222222	0	0	0	0	1	0.111111	6	0.666667	0	0				7	14	20	45.5556	15761	8649	10755	17512.2
Scaffold_2071	8159	9	1	2	0.222222	1	0.111111	0	0	0	0	6	0.666667	0	0				1	0	1	2.22222	6017	3181	3548	6685.56
Scaffold_1458	7112	8	1	1	0.125	0	0	0	0	1	0.125	6	0.75	0	0				2	1	3	7.5	3698	2019	2479	4622.5
Scaffold_1471	7710	8	1	0	0	0	0	0	0	4	0.5	4	0.5	0	0				0	1	0	1.25	1619	627	2640	2023.75
Scaffold_1503	7722	8	1	1	0.125	1	0.125	0	0	1	0.125	5	0.625	0	0				3	6	1	12.5	11885	8729	9706	14856.2
Scaffold_1504	7031	8	0.875	1	0.125	0	0	0	0	2	0.25	4	0.5	1	0.125				6	7	0	16.25	4594	2376	2966	5742.5
Scaffold_1508	7186	8	1	1	0.125	0	0	0	0	0	0	7	0.875	0	0				0	2	9	13.75	3680	2065	2358	4600
Scaffold_1519	7549	8	1	1	0.125	0	0	0	0	2	0.25	5	0.625	0	0				1	3	1	6.25	4680	2278	2717	5850
Scaffold_1536	7997	8	1	0	0	1	0.125	0	0	1	0.125	6	0.75	0	0	x			0	1	10	13.75	2994	1548	1710	3742.5
Scaffold_1537	7138	8	1	3	0.375	0	0	0	0	0	0	5	0.625	0	0				1	13	3	21.25	6148	3227	3653	7685
Scaffold_1564	7551	8	1	0	0	0	0	0	0	2	0.25	6	0.75	0	0				0	1	0	1.25	3286	1569	1695	4107.5
Scaffold_1588	7084	8	1	1	0.125	1	0.125	0	0	1	0.125	5	0.625	0	0				6	2	12	25	7843	3809	4975	9803.75
Scaffold_1598	7732	8	1	0	0	1	0.125	0	0	0	0	7	0.875	0	0				1	6	5	15	13216	8518	10098	16520
Scaffold_1604	7746	8	1	4	0.5	0	0	0	0	0	0	4	0.5	0	0	x	x		3	0	3	7.5	2377	1216	1476	2971.25
Scaffold_1627	7482	8	1	0	0	0	0	0	0	1	0.125	7	0.875	0	0				2	2	3	8.75	4994	3215	3507	6242.5
Scaffold_1648	7990	8	0.875	2	0.25	0	0	0	0	3	0.375	2	0.25	1	0.125				0	0	0	0	1505	795	2503	1881.25
Scaffold_1654	7849	8	1	0	0	0	0	0	0	2	0.25	6	0.75	0	0				3	5	8	20	9860	4682	5852	12325
Scaffold_1656	7982	8	0.875	2	0.25	0	0	0	0	3	0.375	2	0.25	1	0.125				8	7	6	26.25	9610	4415	5599	12012.5
Scaffold_1659	7884	8	1	2	0.25	0	0	0	0	4	0.5	2	0.25	0	0				3	8	5	20	10425	5160	6590	13031.2
Scaffold_1660	7983	8	0.875	1	0.125	0	0	0	0	2	0.25	4	0.5	1	0.125				6	12	25	53.75	9285	4436	5749	11606.2
Scaffold_1661	7681	8	1	1	0.125	0	0	0	0	2	0.25	5	0.625	0	0				0	6	6	15	1941	923	1296	2426.25
Scaffold_1664	7841	8	1	3	0.375	0	0	0	0	2	0.25	3	0.375	0	0				2	2	0	5	2260	1146	1262	2825
Scaffold_1665	7843	8	1	0	0	0	0	0	0	1	0.125	7	0.875	0	0				9	2	5	20	7854	3872	4717	9817.5
Scaffold_1666	7772	8	1	2	0.25	0	0	0	0	1	0.125	5	0.625	0	0				0	0	6	7.5	8822	4685	6027	11027.5
Scaffold_1667	7819	8	1	2	0.25	0	0	0	0	1	0.125	5	0.625	0	0				4	12	7	28.75	7761	4434	5593	9701.25
Scaffold_1672	7665	8	1	3	0.375	0	0	0	0	0	0	5	0.625	0	0				0	5	4	11.25	3323	1646	2113	4153.75
Scaffold_1673	7731	8	1	3	0.375	0	0	0	0	1	0.125	4	0.5	0	0	x			1	9	4	17.5	1927	5168	1486	2408.75
Scaffold_1674	7679	8	1	4	0.5	0	0	0	0	1	0.125	3	0.375	0	0				2	8	0	12.5	3858	1899	2463	4822.5
Scaffold_1675	7654	8	1	1	0.125	0	0	0	0	1	0.125	6	0.75	0	0				1	1	3	6.25	6268	3228	4071	7835
Scaffold_1676	7679	8	1	2	0.25	0	0	0	0	0	0	6	0.75	0	0				3	9	17	36.25	6266	3176	4043	7832.5
Scaffold_1678	7640	8	1	1	0.125	0	0	0	0	3	0.375	4	0.5	0	0				8	10	6	30	12527	6572	8456	15658.8
Scaffold_1679	7572	8	0.75	3	0.375	0	0	0	0	0	0	3	0.375	2	0.25				11	1	0	15	3382	3024	2590	4227.5
Scaffold_1680	7742	8	1	2	0.25	0	0	0	0	0	0	6	0.75	0	0	x			2	4	5	13.75	3922	2011	2610	4902.5
Scaffold_1681	7660	8	1	0	0	0	0	0	0	2	0.25	6	0.75	0	0				5	1	27	41.25	8562	4183	5283	10702.5
Scaffold_1683	7619	8	1	2	0.25	0	0	0	0	2	0.25	4	0.5	0	0				5	5	6	20	2440	1244	1467	3050
Scaffold_1684	7754	8	1	1	0.125	1	0.125	0	0	1	0.125	5	0.625	0	0	x			0	3	3	7.5	1990	1408	1707	2487.5
Scaffold_1685	7640	8	1	8	1	0	0	0	0	0	0	0	0	0	0				4	40	10	67.5	25594	28880	52002	31992.5
Scaffold_1686	7535	8	1	1	0.125	0	0	0	0	3	0.375	4	0.5	0	0				2	0	0	2.5	4768	2430	2643	5960
Scaffold_1687	7505	8	1	1	0.125	1	0.125	0	0	2	0.25	4	0.5	0	0				8	17	0	31.25	6837	3283	4212	8546.25
Scaffold_1688	7611	8	1	4	0.5	0	0	0	0	2	0.25	2	0.25	0	0				5	33	8	57.5	10662	5281	6515	13327.5
Scaffold_1691	7477	8	1	0	0	0	0	0	0	0	0	8	1	0	0				2	24	10	45	4189	2153	2729	5236.25
Scaffold_1692	7958	8	1	3	0.375	0	0	0	0	2	0.25	3	0.375	0	0				10	18	21	61.25	10148	4996	6238	12685
Scaffold_1697	7545	8	1	3	0.375	0	0	0	0	4	0.5	1	0.125	0	0				1	0	0	1.25	3002	1472	3475	3752.5
Scaffold_1698	7860	8	1	3	0.375	1	0.125	0	0	0	0	4	0.5	0	0				5	18	6	36.25	7813	3939	4905	9766.25
Scaffold_1700	7438	8	1	3	0.375	0	0	0	0	3	0.375	2	0.25	0	0				5	9	14	35	11250	5661	7564	14062.5
Scaffold_1702	7817	8	1	2	0.25	0	0	0	0	1	0.125	5	0.625	0	0				0	7	17	30	10146	5233	6860	12682.5
Scaffold_1703	7423	8	1	3	0.375	0	0	0	0	1	0.125	4	0.5	0	0				1	10	12	28.75	10919	5940	7667	13648.8
Scaffold_1705	7521	8	1	0	0	0	0	0	0	0	0	8	1	0	0				4	11	3	22.5	10739	5844	7378	13423.8
Scaffold_1706	7685	8	1	2	0.25	0	0	0	0	2	0.25	4	0.5	0	0				0	3	2	6.25	5990	3131	3828	7487.5
Scaffold_1708	7309	8	1	0	0	0	0	0	0	0	0	8	1	0	0				1	2	4	8.75	2557	1332	1521	3196.25
Scaffold_1709	7354	8	1	4	0.5	0	0	0	0	0	0	4	0.5	0	0				5	18	4	33.75	9324	4699	5889	11655
Scaffold_1712	7281	8	1	4	0.5	0	0	0	0	0	0	4	0.5	0	0				4	11	5	25	7284	3696	4638	9105
Scaffold_1713	7378	8	1	1	0.125	0	0	0	0	0	0	7	0.875	0	0				1	25	3	36.25	6315	3341	3846	7893.75
Scaffold_1715	7467	8	1	2	0.25	0	0	0	0	1	0.125	5	0.625	0	0	x			1	5	0	7.5	5029	2384	2950	6286.25
Scaffold_1716	7304	8	1	1	0.125	1	0.125	0	0	2	0.25	4	0.5	0	0				2	6	1	11.25	5577	2770	3410	6971.25
Scaffold_1717	7444	8	1	0	0	0	0	0	0	2	0.25	6	0.75	0	0				5	5	4	17.5	6515	3545	3960	8143.75
Scaffold_1718	7145	8	1	3	0.375	0	0	0	0	0	0	5	0.625	0	0				2	1	2	6.25	4134	2120	3628	5167.5
Scaffold_1720	7317	8	1	3	0.375	1	0.125	0	0	1	0.125	3	0.375	0	0				8	8	14	37.5	9267	4785	5880	11583.8
Scaffold_1722	7473	8	1	2	0.25	0	0	0	0	1	0.125	5	0.625	0	0				7	2	1	12.5	5688	2738	3510	7110
Scaffold_1723	7075	8	1	2	0.25	0	0	0	0	0	0	6	0.75	0	0	x			0	3	3	7.5	3273	1770	2308	4091.25
Scaffold_1724	7919	8	1	2	0.25	0	0	0	0	0	0	6	0.75	0	0				1	3	1	6.25	4363	2390	2913	5453.75
Scaffold_1725	7307	8	1	2	0.25	1	0.125	1	0.125	4	0.5	0	0	0	0				2	0	0	2.5	5741	2689	3544	7176.25
Scaffold_1726	7309	8	1	2	0.25	0	0	0	0	4	0.5	2	0.25	0	0				0	1	0	1.25	6298	3139	4191	7872.5
Scaffold_1727	7185	8	1	0	0	1	0.125	0	0	4	0.5	3	0.375	0	0				11	4	7	27.5	5557	2724	3314	6946.25
Scaffold_1728	7314	8	1	3	0.375	2	0.25	0	0	0	0	3	0.375	0	0				5	4	0	11.25	5527	2561	3182	6908.75
Scaffold_1730	7128	8	1	1	0.125	0	0	0	0	3	0.375	4	0.5	0	0				1	5	12	22.5	7747	4191	5280	9683.75
Scaffold_1731	7161	8	1	2	0.25	0	0	0	0	2	0.25	4	0.5	0	0				7	4	8	23.75	9770	4801	5917	12212.5
Scaffold_1732	7105	8	1	1	0.125	0	0	0	0	3	0.375	4	0.5	0	0				3	5	2	12.5	6908	3197	4028	8635
Scaffold_1733	7452	8	1	0	0	0	0	0	0	6	0.75	2	0.25	0	0				1	7	6	17.5	7537	3451	4262	9421.25
Scaffold_1735	7008	8	1	3	0.375	0	0	0	0	1	0.125	4	0.5	0	0				3	2	3	10	5626	3035	3329	7032.5
Scaffold_1737	7652	8	1	3	0.375	0	0	0	0	1	0.125	4	0.5	0	0				3	3	7	16.25	9872	5153	6088	12340
Scaffold_1738	7002	8	1	3	0.375	0	0	0	0	0	0	5	0.625	0	0				1	6	4	13.75	8044	4542	5168	10055
Scaffold_1739	7248	8	1	0	0	1	0.125	0	0	2	0.25	5	0.625	0	0				1	3	1	6.25	1657	888	1131	2071.25
Scaffold_1740	7232	8	1	2	0.25	0	0	0	0	2	0.25	4	0.5	0	0				3	3	3	11.25	7969	3982	4910	9961.25
Scaffold_1741	7216	8	1	1	0.125	0	0	0	0	3	0.375	4	0.5	0	0	x			2	3	3	10	5977	2953	3648	7471.25
Scaffold_1742	7153	8	1	1	0.125	0	0	0	0	0	0	7	0.875	0	0				2	4	1	8.75	4237	2225	2856	5296.25
Scaffold_1744	7169	8	1	1	0.125	1	0.125	0	0	0	0	6	0.75	0	0				0	0	1	1.25	2167	1144	1290	2708.75
Scaffold_1747	7197	8	1	0	0	0	0	0	0	2	0.25	6	0.75	0	0				4	0	6	12.5	5807	3105	4035	7258.75
Scaffold_1748	7037	8	1	3	0.375	0	0	0	0	3	0.375	2	0.25	0	0				1	0	0	1.25	7964	3752	4664	9955
Scaffold_1749	7183	8	1	4	0.5	0	0	0	0	1	0.125	3	0.375	0	0				2	11	10	28.75	9903	5221	6737	12378.8
Scaffold_1750	7399	8	1	2	0.25	0	0	0	0	2	0.25	4	0.5	0	0				2	2	2	7.5	4759	2267	2526	5948.75
Scaffold_1751	7171	8	1	4	0.5	0	0	0	0	1	0.125	3	0.375	0	0				7	10	1	22.5	4525	2200	2728	5656.25
Scaffold_1755	7062	8	0.75	1	0.125	0	0	0	0	3	0.375	2	0.25	2	0.25				0	0	0	0	3017	1508	2032	3771.25
Scaffold_1761	7008	8	1	7	0.875	0	0	0	0	0	0	1	0.125	0	0				0	32	9	51.25	57680	71848	115204	72100
Scaffold_1762	7231	8	1	0	0	0	0	0	0	2	0.25	6	0.75	0	0				6	2	0	10	5347	2589	3308	6683.75
Scaffold_1768	7298	8	1	1	0.125	1	0.125	0	0	3	0.375	3	0.375	0	0				4	10	10	30	8107	4074	5048	10133.8
Scaffold_1769	7546	8	1	0	0	0	0	0	0	1	0.125	7	0.875	0	0				2	6	6	17.5	5971	3050	3950	7463.75
Scaffold_1777	7069	8	1	2	0.25	0	0	0	0	1	0.125	5	0.625	0	0				0	5	0	6.25	5772	3081	3853	7215
Scaffold_1778	7109	8	1	0	0	0	0	0	0	2	0.25	6	0.75	0	0				0	3	2	6.25	5843	2957	3765	7303.75
Scaffold_1786	7127	8	1	4	0.5	0	0	0	0	0	0	4	0.5	0	0	x			1	1	2	5	5750	3159	3822	7187.5
Scaffold_1787	7199	8	1	2	0.25	0	0	0	0	0	0	6	0.75	0	0	x			2	4	4	12.5	4673	2291	3026	5841.25
Scaffold_1800	7171	8	1	3	0.375	0	0	0	0	1	0.125	4	0.5	0	0				2	5	0	8.75	4700	2363	3017	5875
Scaffold_1801	7047	8	1	2	0.25	0	0	0	0	0	0	6	0.75	0	0				2	0	0	2.5	5549	2516	3088	6936.25
Scaffold_1804	7078	8	1	0	0	0	0	0	0	1	0.125	7	0.875	0	0				3	2	2	8.75	3484	1651	2043	4355
Scaffold_1806	7064	8	1	1	0.125	1	0.125	0	0	1	0.125	5	0.625	0	0				4	2	0	7.5	8381	4363	5643	10476.2
Scaffold_1811	7608	8	1	0	0	0	0	0	0	1	0.125	7	0.875	0	0				0	8	11	23.75	9103	4870	6011	11378.8
Scaffold_1815	7242	8	1	1	0.125	0	0	0	0	1	0.125	6	0.75	0	0				2	10	2	17.5	7459	3954	5141	9323.75
Scaffold_1820	7342	8	0.875	1	0.125	0	0	0	0	1	0.125	5	0.625	1	0.125				4	9	3	20	5718	2915	3737	7147.5
Scaffold_1830	7461	8	1	2	0.25	0	0	0	0	0	0	6	0.75	0	0	x			0	5	7	15	3641	1923	2393	4551.25
Scaffold_1832	7059	8	1	0	0	0	0	0	0	1	0.125	7	0.875	0	0				0	2	9	13.75	4154	2132	2761	5192.5
Scaffold_1841	7253	8	1	2	0.25	1	0.125	0	0	0	0	5	0.625	0	0				2	19	5	32.5	10171	5881	6907	12713.8
Scaffold_1843	7009	8	1	0	0	0	0	0	0	2	0.25	6	0.75	0	0	x			3	12	1	20	5345	2713	3569	6681.25
Scaffold_1845	7661	8	1	0	0	1	0.125	0	0	1	0.125	6	0.75	0	0	x	x		0	0	0	0	13	22	32	16.25
Scaffold_1865	7873	8	1	0	0	0	0	0	0	4	0.5	4	0.5	0	0				6	5	2	16.25	8644	4280	5502	10805
Scaffold_1868	7446	8	1	2	0.25	0	0	0	0	1	0.125	5	0.625	0	0				0	4	1	6.25	17950	11206	12766	22437.5
Scaffold_1888	7343	8	1	1	0.125	1	0.125	0	0	3	0.375	3	0.375	0	0				2	10	10	27.5	8204	4342	5326	10255
Scaffold_1892	7440	8	1	0	0	0	0	0	0	1	0.125	7	0.875	0	0				6	1	4	13.75	5218	2687	3233	6522.5
Scaffold_1916	7080	8	1	0	0	0	0	0	0	1	0.125	7	0.875	0	0	x			0	0	1	1.25	1889	992	1199	2361.25
Scaffold_1919	7228	8	1	0	0	1	0.125	0	0	1	0.125	6	0.75	0	0	x			1	0	1	2.5	3561	1689	2033	4451.25
Scaffold_1924	7685	8	1	3	0.375	0	0	0	0	0	0	5	0.625	0	0				6	3	10	23.75	7491	4177	5095	9363.75
Scaffold_1927	7564	8	1	0	0	0	0	0	0	2	0.25	6	0.75	0	0				7	7	8	27.5	9458	5515	6825	11822.5
Scaffold_2044	7189	8	1	0	0	1	0.125	0	0	1	0.125	6	0.75	0	0	x			1	0	6	8.75	4474	2294	2718	5592.5
Scaffold_2552	7188	8	1	0	0	0	0	0	0	2	0.25	6	0.75	0	0				4	3	1	10	4457	2268	2641	5571.25
Scaffold_1532	6633	7	1	3	0.428571	0	0	0	0	1	0.142857	3	0.428571	0	0				3	5	0	11.4286	3761	2028	2296	5372.86
Scaffold_1545	6850	7	1	1	0.142857	0	0	0	0	3	0.428571	3	0.428571	0	0	x			0	0	0	0	642	291	329	917.143
Scaffold_1562	6818	7	1	0	0	0	0	0	0	2	0.285714	5	0.714286	0	0	x			0	0	0	0	3808	1839	2181	5440
Scaffold_1695	6891	7	1	1	0.142857	1	0.142857	0	0	1	0.142857	4	0.571429	0	0				4	23	6	47.1429	7884	3804	4869	11262.9
Scaffold_1707	6982	7	1	0	0	0	0	0	0	2	0.285714	5	0.714286	0	0				0	1	1	2.85714	4480	2414	2877	6400
Scaffold_1743	6696	7	1	3	0.428571	0	0	0	0	1	0.142857	3	0.428571	0	0				4	3	1	11.4286	4849	2368	2835	6927.14
Scaffold_1745	6851	7	1	5	0.714286	0	0	0	0	0	0	2	0.285714	0	0				17	7	10	48.5714	6034	3236	4063	8620
Scaffold_1752	6947	7	1	0	0	0	0	0	0	3	0.428571	4	0.571429	0	0				2	11	6	27.1429	4948	2477	3300	7068.57
Scaffold_1753	6997	7	1	0	0	0	0	0	0	1	0.142857	6	0.857143	0	0				4	2	5	15.7143	6044	3006	3737	8634.29
Scaffold_1754	6966	7	1	1	0.142857	0	0	0	0	1	0.142857	5	0.714286	0	0				4	4	2	14.2857	8620	4601	5833	12314.3
Scaffold_1756	6049	7	1	1	0.142857	0	0	0	0	0	0	6	0.857143	0	0				2	4	1	10	2687	1297	1638	3838.57
Scaffold_1757	6944	7	1	1	0.142857	0	0	0	0	1	0.142857	5	0.714286	0	0				0	2	5	10	4592	2388	3166	6560
Scaffold_1760	6692	7	1	3	0.428571	0	0	0	0	1	0.142857	3	0.428571	0	0				9	5	13	38.5714	19600	10470	13139	28000
Scaffold_1763	6908	7	1	0	0	0	0	2	0.285714	0	0	5	0.714286	0	0				1	1	0	2.85714	4391	1792	1989	6272.86
Scaffold_1764	6789	7	1	4	0.571429	0	0	1	0.142857	1	0.142857	1	0.142857	0	0				3	1	0	5.71429	4351	1965	2434	6215.71
Scaffold_1766	6833	7	1	0	0	0	0	0	0	1	0.142857	6	0.857143	0	0				0	0	1	1.42857	3454	1671	1822	4934.29
Scaffold_1767	6875	7	1	0	0	0	0	0	0	3	0.428571	4	0.571429	0	0				0	1	3	5.71429	2670	1215	1495	3814.29
Scaffold_1770	6891	7	0.857143	0	0	1	0.142857	0	0	3	0.428571	2	0.285714	1	0.142857	x			0	0	0	0	701	347	464	1001.43
Scaffold_1771	6881	7	1	0	0	0	0	0	0	1	0.142857	6	0.857143	0	0				4	17	12	47.1429	7058	3536	4281	10082.9
Scaffold_1772	6741	7	1	2	0.285714	1	0.142857	0	0	2	0.285714	2	0.285714	0	0				3	11	13	38.5714	6541	3187	4012	9344.29
Scaffold_1773	6842	7	1	3	0.428571	0	0	0	0	0	0	4	0.571429	0	0				3	7	14	34.2857	9764	5060	6460	13948.6
Scaffold_1774	6908	7	1	7	1	0	0	0	0	0	0	0	0	0	0				0	13	9	31.4286	61659	78900	123510	88084.3
Scaffold_1776	6926	7	1	0	0	0	0	0	0	4	0.571429	3	0.428571	0	0	x			2	7	0	12.8571	3236	1574	1942	4622.86
Scaffold_1779	6403	7	1	1	0.142857	0	0	0	0	1	0.142857	5	0.714286	0	0	x	x		1	5	2	11.4286	3031	1515	1949	4330
Scaffold_1782	6561	7	0.857143	0	0	0	0	0	0	1	0.142857	5	0.714286	1	0.142857				4	0	1	7.14286	4257	2219	2903	6081.43
Scaffold_1783	6776	7	1	3	0.428571	0	0	0	0	1	0.142857	3	0.428571	0	0				2	3	0	7.14286	4120	2251	2860	5885.71
Scaffold_1784	6830	7	1	1	0.142857	0	0	0	0	2	0.285714	4	0.571429	0	0				0	0	0	0	463	2093	320	661.429
Scaffold_1788	6555	7	1	1	0.142857	0	0	0	0	0	0	6	0.857143	0	0				0	4	1	7.14286	3112	1672	1799	4445.71
Scaffold_1790	6769	7	0.857143	2	0.285714	1	0.142857	0	0	1	0.142857	2	0.285714	1	0.142857	x			4	2	0	8.57143	235	138	236	335.714
Scaffold_1791	6603	7	1	1	0.142857	0	0	0	0	1	0.142857	5	0.714286	0	0				6	4	7	24.2857	7745	3553	4668	11064.3
Scaffold_1792	6614	7	1	1	0.142857	1	0.142857	0	0	0	0	5	0.714286	0	0				0	0	0	0	4810	2243	2849	6871.43
Scaffold_1793	6992	7	1	0	0	0	0	0	0	0	0	7	1	0	0	x			0	0	1	1.42857	3032	1596	2137	4331.43
Scaffold_1794	6171	7	1	0	0	0	0	0	0	1	0.142857	6	0.857143	0	0				2	0	0	2.85714	9491	5738	6353	13558.6
Scaffold_1795	6710	7	0.857143	0	0	0	0	0	0	1	0.142857	5	0.714286	1	0.142857	x			0	1	1	2.85714	2906	1328	1548	4151.43
Scaffold_1796	6730	7	1	0	0	0	0	0	0	2	0.285714	5	0.714286	0	0				4	0	3	10	8045	3870	4630	11492.9
Scaffold_1797	6793	7	1	2	0.285714	0	0	0	0	1	0.142857	4	0.571429	0	0				2	0	2	5.71429	4863	2355	2841	6947.14
Scaffold_1802	6560	7	1	1	0.142857	0	0	0	0	1	0.142857	5	0.714286	0	0				2	1	3	8.57143	5455	2806	3502	7792.86
Scaffold_1803	6723	7	1	3	0.428571	0	0	0	0	1	0.142857	3	0.428571	0	0				0	0	0	0	1316	804	1313	1880
Scaffold_1805	6857	7	1	2	0.285714	0	0	0	0	1	0.142857	4	0.571429	0	0				2	0	1	4.28571	3815	1957	2559	5450
Scaffold_1807	6065	7	1	0	0	0	0	0	0	3	0.428571	4	0.571429	0	0				2	0	3	7.14286	2626	1280	1513	3751.43
Scaffold_1808	6593	7	1	1	0.142857	1	0.142857	0	0	3	0.428571	2	0.285714	0	0				9	8	7	34.2857	7245	3474	4572	10350
Scaffold_1809	6654	7	1	0	0	0	0	0	0	3	0.428571	4	0.571429	0	0	x			0	0	0	0	294	257	145	420
Scaffold_1810	6795	7	1	5	0.714286	0	0	0	0	0	0	2	0.285714	0	0				7	11	6	34.2857	7737	3938	4898	11052.9
Scaffold_1813	6676	7	1	0	0	1	0.142857	0	0	1	0.142857	5	0.714286	0	0	x			1	0	0	1.42857	935	503	594	1335.71
Scaffold_1814	6698	7	1	0	0	0	0	0	0	1	0.142857	6	0.857143	0	0				1	77	0	111.429	13480	8072	10195	19257.1
Scaffold_1816	6389	7	1	0	0	0	0	0	0	1	0.142857	6	0.857143	0	0				0	0	0	0	2585	6842	2152	3692.86
Scaffold_1817	6665	7	1	2	0.285714	1	0.142857	0	0	2	0.285714	2	0.285714	0	0				14	18	1	47.1429	5845	3280	3755	8350
Scaffold_1818	6467	7	1	5	0.714286	0	0	0	0	0	0	2	0.285714	0	0				1	0	0	1.42857	49	29	88	70
Scaffold_1819	6851	7	1	2	0.285714	0	0	0	0	0	0	5	0.714286	0	0				2	5	1	11.4286	3717	1988	2459	5310
Scaffold_1822	6426	7	1	1	0.142857	0	0	0	0	0	0	6	0.857143	0	0				9	6	0	21.4286	8146	4449	5476	11637.1
Scaffold_1823	6711	7	1	3	0.428571	0	0	0	0	4	0.571429	0	0	0	0				0	0	1	1.42857	5711	2619	3266	8158.57
Scaffold_1824	6440	7	1	3	0.428571	0	0	0	0	1	0.142857	3	0.428571	0	0	x			2	4	0	8.57143	2965	1440	1800	4235.71
Scaffold_1825	6483	7	1	4	0.571429	0	0	0	0	0	0	3	0.428571	0	0				2	1	5	11.4286	5486	2870	3340	7837.14
Scaffold_1826	6609	7	0.714286	3	0.428571	0	0	0	0	1	0.142857	1	0.142857	2	0.285714	x			0	0	0	0	20	6	4	28.5714
Scaffold_1827	6609	7	0.714286	3	0.428571	0	0	0	0	1	0.142857	1	0.142857	2	0.285714				0	0	0	0	49	13	13	70
Scaffold_1829	6698	7	1	1	0.142857	0	0	0	0	1	0.142857	5	0.714286	0	0				2	3	3	11.4286	6243	3025	3735	8918.57
Scaffold_1831	6593	7	1	4	0.571429	0	0	0	0	2	0.285714	1	0.142857	0	0				0	0	0	0	177	91	109	252.857
Scaffold_1833	6230	7	1	0	0	0	0	0	0	0	0	7	1	0	0				1	6	6	18.5714	8038	4638	5763	11482.9
Scaffold_1836	6895	7	0.857143	0	0	0	0	0	0	1	0.142857	5	0.714286	1	0.142857	x			4	5	0	12.8571	4724	2288	2675	6748.57
Scaffold_1837	6444	7	1	0	0	1	0.142857	0	0	1	0.142857	5	0.714286	0	0				6	8	1	21.4286	4851	2455	3198	6930
Scaffold_1839	6279	7	1	1	0.142857	0	0	0	0	3	0.428571	3	0.428571	0	0				7	12	5	34.2857	8357	3908	5051	11938.6
Scaffold_1842	6685	7	1	2	0.285714	0	0	0	0	0	0	5	0.714286	0	0	x			0	0	0	0	4053	2079	2404	5790
Scaffold_1844	6534	7	1	0	0	0	0	0	0	3	0.428571	4	0.571429	0	0				4	4	2	14.2857	8377	4144	4994	11967.1
Scaffold_1846	6372	7	1	7	1	0	0	0	0	0	0	0	0	0	0				11	1	3	21.4286	1648	1604	1251	2354.29
Scaffold_1847	6649	7	1	1	0.142857	1	0.142857	0	0	0	0	5	0.714286	0	0	x			0	0	0	0	1123	773	903	1604.29
Scaffold_1850	6374	7	1	4	0.571429	0	0	0	0	0	0	3	0.428571	0	0	x			1	6	3	14.2857	3866	2141	2687	5522.86
Scaffold_1852	6658	7	1	2	0.285714	0	0	0	0	1	0.142857	4	0.571429	0	0				2	0	13	21.4286	3742	1888	2441	5345.71
Scaffold_1854	6775	7	1	0	0	0	0	0	0	2	0.285714	5	0.714286	0	0				1	1	0	2.85714	2928	1605	1837	4182.86
Scaffold_1856	6277	7	1	2	0.285714	1	0.142857	0	0	0	0	4	0.571429	0	0	x			0	0	2	2.85714	2568	1307	1542	3668.57
Scaffold_1857	6416	7	1	4	0.571429	0	0	0	0	0	0	3	0.428571	0	0				4	6	8	25.7143	7105	3448	4481	10150
Scaffold_1858	6488	7	1	3	0.428571	0	0	0	0	2	0.285714	2	0.285714	0	0				1	4	2	10	5020	2364	2910	7171.43
Scaffold_1859	6234	7	1	0	0	0	0	0	0	2	0.285714	5	0.714286	0	0				2	5	5	17.1429	5180	2570	3247	7400
Scaffold_1860	6549	7	1	3	0.428571	0	0	0	0	2	0.285714	2	0.285714	0	0				2	3	4	12.8571	4809	2349	2913	6870
Scaffold_1863	6389	7	1	1	0.142857	0	0	0	0	1	0.142857	5	0.714286	0	0				0	36	4	57.1429	8048	4079	5305	11497.1
Scaffold_1864	6310	7	0.857143	1	0.142857	0	0	0	0	0	0	5	0.714286	1	0.142857				1	5	1	10	3272	1593	1982	4674.29
Scaffold_1867	6403	7	1	4	0.571429	0	0	0	0	2	0.285714	1	0.142857	0	0				0	0	0	0	4	4	3	5.71429
Scaffold_1869	6113	7	1	0	0	0	0	0	0	1	0.142857	6	0.857143	0	0				0	5	1	8.57143	5471	2752	3444	7815.71
Scaffold_1871	6518	7	1	1	0.142857	0	0	0	0	3	0.428571	3	0.428571	0	0				0	1	10	15.7143	7706	3713	4630	11008.6
Scaffold_1873	6451	7	1	0	0	0	0	0	0	2	0.285714	5	0.714286	0	0				2	13	3	25.7143	5078	2597	3302	7254.29
Scaffold_1875	6874	7	1	1	0.142857	0	0	0	0	1	0.142857	5	0.714286	0	0				0	3	5	11.4286	7078	4640	5484	10111.4
Scaffold_1877	6284	7	1	0	0	1	0.142857	0	0	1	0.142857	5	0.714286	0	0	x			2	5	2	12.8571	4565	2636	3205	6521.43
Scaffold_1878	6094	7	1	2	0.285714	0	0	0	0	0	0	5	0.714286	0	0				0	4	3	10	3717	2008	2523	5310
Scaffold_1879	6109	7	0.857143	0	0	1	0.142857	0	0	1	0.142857	4	0.571429	1	0.142857	x			2	11	0	18.5714	4155	2248	2903	5935.71
Scaffold_1880	6167	7	1	1	0.142857	0	0	0	0	0	0	6	0.857143	0	0				4	0	13	24.2857	4938	2406	2848	7054.29
Scaffold_1881	6464	7	1	1	0.142857	0	0	0	0	2	0.285714	4	0.571429	0	0				0	3	4	10	7644	4184	5353	10920
Scaffold_1884	6430	7	1	5	0.714286	0	0	0	0	1	0.142857	1	0.142857	0	0				0	0	2	2.85714	14	54	28	20
Scaffold_1885	6214	7	1	1	0.142857	1	0.142857	0	0	1	0.142857	4	0.571429	0	0				5	5	1	15.7143	3094	1536	1654	4420
Scaffold_1886	6311	7	1	0	0	0	0	0	0	0	0	7	1	0	0	x			1	7	1	12.8571	4436	2188	2843	6337.14
Scaffold_1887	6233	7	1	0	0	0	0	0	0	1	0.142857	6	0.857143	0	0				3	3	1	10	4022	2028	2349	5745.71
Scaffold_1893	6234	7	1	3	0.428571	0	0	0	0	1	0.142857	3	0.428571	0	0				1	2	3	8.57143	4402	2121	2638	6288.57
Scaffold_1894	6677	7	1	4	0.571429	0	0	0	0	0	0	3	0.428571	0	0	x			1	2	2	7.14286	5517	2874	3565	7881.43
Scaffold_1897	6534	7	1	0	0	0	0	0	0	2	0.285714	5	0.714286	0	0				1	2	0	4.28571	4672	2291	2889	6674.29
Scaffold_1898	6390	7	1	1	0.142857	0	0	0	0	0	0	6	0.857143	0	0				0	6	12	25.7143	7756	4365	5243	11080
Scaffold_1899	6879	7	1	2	0.285714	0	0	0	0	1	0.142857	4	0.571429	0	0				0	6	1	10	5459	2855	3361	7798.57
Scaffold_1900	6763	7	1	1	0.142857	0	0	0	0	0	0	6	0.857143	0	0				1	0	10	15.7143	14822	12198	11046	21174.3
Scaffold_1901	6105	7	1	1	0.142857	0	0	0	0	1	0.142857	5	0.714286	0	0				2	0	1	4.28571	4688	2421	2925	6697.14
Scaffold_1902	6327	7	1	2	0.285714	0	0	0	0	1	0.142857	4	0.571429	0	0	x	x		1	0	2	4.28571	2227	1102	1333	3181.43
Scaffold_1904	6461	7	1	2	0.285714	0	0	0	0	0	0	5	0.714286	0	0				7	0	23	42.8571	9567	4859	6268	13667.1
Scaffold_1907	6221	7	1	2	0.285714	0	0	0	0	0	0	5	0.714286	0	0				3	0	5	11.4286	3808	1933	2369	5440
Scaffold_1908	6394	7	1	1	0.142857	0	0	0	0	1	0.142857	5	0.714286	0	0				1	12	19	45.7143	8326	4392	5537	11894.3
Scaffold_1909	6113	7	1	2	0.285714	0	0	0	0	1	0.142857	4	0.571429	0	0				4	4	5	18.5714	3531	1914	2367	5044.29
Scaffold_1910	6149	7	1	0	0	0	0	0	0	2	0.285714	5	0.714286	0	0				1	2	1	5.71429	4382	2559	2424	6260
Scaffold_1911	6081	7	1	3	0.428571	0	0	0	0	0	0	4	0.571429	0	0				1	4	2	10	5942	3183	3913	8488.57
Scaffold_1912	6686	7	1	2	0.285714	0	0	0	0	1	0.142857	4	0.571429	0	0				0	2	12	20	4198	2214	2733	5997.14
Scaffold_1915	6793	7	1	1	0.142857	0	0	0	0	1	0.142857	5	0.714286	0	0				3	5	6	20	5345	2688	3775	7635.71
Scaffold_1917	6101	7	1	1	0.142857	0	0	0	0	1	0.142857	5	0.714286	0	0				1	4	2	10	2963	1301	1711	4232.86
Scaffold_1923	6278	7	1	1	0.142857	0	0	0	0	0	0	6	0.857143	0	0				0	0	0	0	2875	1532	1859	4107.14
Scaffold_1930	6442	7	1	2	0.285714	0	0	0	0	1	0.142857	4	0.571429	0	0				0	1	23	34.2857	3639	1888	2358	5198.57
Scaffold_1933	6035	7	1	2	0.285714	1	0.142857	0	0	0	0	4	0.571429	0	0				1	2	2	7.14286	5619	2736	3061	8027.14
Scaffold_1934	6057	7	1	2	0.285714	0	0	0	0	0	0	5	0.714286	0	0				4	6	5	21.4286	8230	4236	5223	11757.1
Scaffold_1935	6051	7	1	2	0.285714	0	0	0	0	1	0.142857	4	0.571429	0	0				0	5	3	11.4286	3159	2405	1962	4512.86
Scaffold_1938	6015	7	1	6	0.857143	0	0	0	0	0	0	1	0.142857	0	0				0	18	9	38.5714	14831	18361	31444	21187.1
Scaffold_1939	6253	7	1	1	0.142857	0	0	0	0	1	0.142857	5	0.714286	0	0				1	2	0	4.28571	5219	2396	3232	7455.71
Scaffold_1940	6008	7	0.857143	0	0	1	0.142857	0	0	0	0	5	0.714286	1	0.142857				1	7	1	12.8571	6399	3140	4106	9141.43
Scaffold_1945	6141	7	1	0	0	0	0	0	0	3	0.428571	4	0.571429	0	0				0	0	6	8.57143	2400	1246	1610	3428.57
Scaffold_1946	6883	7	1	1	0.142857	0	0	0	0	1	0.142857	5	0.714286	0	0				0	2	1	4.28571	5553	3283	4047	7932.86
Scaffold_2009	6390	7	1	0	0	0	0	0	0	1	0.142857	6	0.857143	0	0				2	3	3	11.4286	3162	1544	2035	4517.14
Scaffold_2305	6039	7	1	3	0.428571	0	0	0	0	0	0	4	0.571429	0	0				8	0	5	18.5714	5444	2981	3752	7777.14
Scaffold_2400	6384	7	1	4	0.571429	0	0	0	0	0	0	3	0.428571	0	0				1	1	3	7.14286	10094	5212	6429	14420
Scaffold_2408	6125	7	1	0	0	1	0.142857	0	0	0	0	6	0.857143	0	0				3	4	2	12.8571	11242	6717	7829	16060
Scaffold_2693	6654	7	1	0	0	0	0	0	0	2	0.285714	5	0.714286	0	0				6	3	18	38.5714	8930	5198	6260	12757.1
Scaffold_2872	6899	7	1	0	0	0	0	0	0	2	0.285714	5	0.714286	0	0	x		6	0	2	1	4.28571	2569	1373	1554	3670
Scaffold_2929	6041	7	1	2	0.285714	0	0	0	0	1	0.142857	4	0.571429	0	0	x		3	5	4	2	15.7143	3069	2112	2335	4384.29
Scaffold_3152	6159	7	1	3	0.428571	0	0	0	0	1	0.142857	3	0.428571	0	0			6	1	3	2	8.57143	6053	3112	3764	8647.14
Scaffold_3153	6459	7	1	1	0.142857	0	0	0	0	0	0	6	0.857143	0	0			6	1	8	0	12.8571	4350	2164	2689	6214.29
Scaffold_3155	6484	7	1	0	0	0	0	0	0	2	0.285714	5	0.714286	0	0			8	1	0	2	4.28571	3724	1698	2099	5320
Scaffold_3157	6566	7	1	2	0.285714	0	0	0	0	0	0	5	0.714286	0	0			4	1	1	4	8.57143	11486	7147	8660	16408.6
Scaffold_3159	6091	7	1	1	0.142857	0	0	0	0	1	0.142857	5	0.714286	0	0	x		4	4	2	2	11.4286	3909	1853	2302	5584.29
Scaffold_3161	6151	7	1	0	0	0	0	0	0	2	0.285714	5	0.714286	0	0	x		2	3	2	3	11.4286	9267	5738	6946	13238.6
Scaffold_3163	6460	7	1	0	0	0	0	0	0	3	0.428571	4	0.571429	0	0			7	1	0	0	1.42857	2328	997	1175	3325.71
Scaffold_3164	6058	7	1	0	0	0	0	0	0	0	0	7	1	0	0			5	2	3	5	14.2857	10477	7011	8130	14967.1
Scaffold_1308	5504	6	1	6	1	0	0	0	0	0	0	0	0	0	0				0	1	1	3.33333	2866	7026	2046	4776.67
Scaffold_1470	5918	6	1	0	0	0	0	0	0	1	0.166667	5	0.833333	0	0	x			4	3	30	61.6667	4646	2329	2740	7743.33
Scaffold_1502	5637	6	1	0	0	0	0	0	0	2	0.333333	4	0.666667	0	0				0	3	2	8.33333	11433	6236	7342	19055
Scaffold_1552	5186	6	0.833333	0	0	1	0.166667	0	0	2	0.333333	2	0.333333	1	0.166667				0	0	0	0	1492	590	2807	2486.67
Scaffold_1812	5826	6	1	2	0.333333	0	0	0	0	0	0	4	0.666667	0	0				3	2	3	13.3333	6982	3306	4287	11636.7
Scaffold_1866	5838	6	1	3	0.5	0	0	0	0	0	0	3	0.5	0	0				2	1	4	11.6667	5016	2779	3508	8360
Scaffold_1896	5888	6	1	4	0.666667	0	0	0	0	0	0	2	0.333333	0	0				11	3	1	25	8374	4007	5093	13956.7
Scaffold_1905	5831	6	0.833333	0	0	0	0	0	0	2	0.333333	3	0.5	1	0.166667				5	0	14	31.6667	8268	4390	5901	13780
Scaffold_1913	5992	6	0.833333	0	0	0	0	0	0	2	0.333333	3	0.5	1	0.166667	x			0	0	2	3.33333	880	698	526	1466.67
Scaffold_1921	5590	6	1	2	0.333333	0	0	0	0	1	0.166667	3	0.5	0	0	x			5	4	3	20	3432	1885	2154	5720
Scaffold_1922	5515	6	1	1	0.166667	0	0	0	0	1	0.166667	4	0.666667	0	0				1	5	7	21.6667	3813	1928	2551	6355
Scaffold_1926	5095	6	1	3	0.5	0	0	0	0	0	0	3	0.5	0	0				1	4	3	13.3333	2972	1343	1827	4953.33
Scaffold_1928	5894	6	0.666667	0	0	0	0	0	0	2	0.333333	2	0.333333	2	0.333333				2	5	4	18.3333	7116	3396	4383	11860
Scaffold_1941	5981	6	1	2	0.333333	1	0.166667	0	0	2	0.333333	1	0.166667	0	0				3	8	0	18.3333	5363	3369	5567	8938.33
Scaffold_1947	5676	6	1	1	0.166667	0	0	1	0.166667	0	0	4	0.666667	0	0	x			2	6	0	13.3333	3862	2047	2591	6436.67
Scaffold_1948	5641	6	0.833333	1	0.166667	0	0	0	0	0	0	4	0.666667	1	0.166667				0	1	8	15	6491	3459	4166	10818.3
Scaffold_1951	5792	6	1	1	0.166667	1	0.166667	0	0	0	0	4	0.666667	0	0				4	4	4	20	2721	1358	1678	4535
Scaffold_1952	5884	6	0.833333	5	0.833333	0	0	0	0	0	0	0	0	1	0.166667				0	0	0	0	295	162	722	491.667
Scaffold_1953	5792	6	1	1	0.166667	0	0	0	0	0	0	5	0.833333	0	0				1	4	2	11.6667	3981	2003	2201	6635
Scaffold_1954	5872	6	1	3	0.5	0	0	0	0	1	0.166667	2	0.333333	0	0				1	0	0	1.66667	1112	663	749	1853.33
Scaffold_1956	5757	6	1	0	0	0	0	0	0	2	0.333333	4	0.666667	0	0				2	3	2	11.6667	4614	2505	3223	7690
Scaffold_1957	5860	6	0.833333	3	0.5	0	0	0	0	2	0.333333	0	0	1	0.166667				0	0	0	0	660	383	466	1100
Scaffold_1958	5740	6	1	1	0.166667	0	0	0	0	1	0.166667	4	0.666667	0	0				1	2	9	20	8991	4710	5765	14985
Scaffold_1960	5849	6	1	6	1	0	0	0	0	0	0	0	0	0	0				0	19	2	35	60126	74565	114460	100210
Scaffold_1962	5090	6	1	0	0	0	0	0	0	3	0.5	3	0.5	0	0	x			0	0	0	0	218	116	145	363.333
Scaffold_1963	5349	6	1	1	0.166667	0	0	0	0	4	0.666667	1	0.166667	0	0				1	2	0	5	4989	3875	2962	8315
Scaffold_1964	5654	6	1	1	0.166667	0	0	0	0	1	0.166667	4	0.666667	0	0				0	0	0	0	3703	1807	2231	6171.67
Scaffold_1965	5531	6	1	2	0.333333	0	0	0	0	3	0.5	1	0.166667	0	0				4	3	12	31.6667	7942	4049	5387	13236.7
Scaffold_1966	5537	6	0.833333	4	0.666667	0	0	0	0	1	0.166667	0	0	1	0.166667				0	0	0	0	1	1	6	1.66667
Scaffold_1967	5536	6	0.833333	2	0.333333	0	0	0	0	3	0.5	0	0	1	0.166667				0	1	0	1.66667	842	383	436	1403.33
Scaffold_1968	5491	6	1	6	1	0	0	0	0	0	0	0	0	0	0				0	24	6	50	33234	42029	70379	55390
Scaffold_1971	5273	6	1	4	0.666667	0	0	0	0	1	0.166667	1	0.166667	0	0				0	2	0	3.33333	3450	5727	3831	5750
Scaffold_1972	5223	6	1	4	0.666667	0	0	0	0	0	0	2	0.333333	0	0				0	9	2	18.3333	39538	49917	75508	65896.7
Scaffold_1973	5207	6	1	2	0.333333	0	0	0	0	1	0.166667	3	0.5	0	0				0	0	0	0	1	0	0	1.66667
Scaffold_1974	5117	6	1	6	1	0	0	0	0	0	0	0	0	0	0				1	12	4	28.3333	68254	84562	123055	113757
Scaffold_1975	5046	6	0.833333	2	0.333333	0	0	0	0	2	0.333333	1	0.166667	1	0.166667				0	2	0	3.33333	6050	6868	4303	10083.3
Scaffold_1976	5059	6	1	5	0.833333	0	0	0	0	0	0	1	0.166667	0	0				0	10	0	16.6667	25668	33266	53095	42780
Scaffold_1977	5022	6	1	5	0.833333	0	0	0	0	0	0	1	0.166667	0	0				0	2	0	3.33333	4689	4532	3050	7815
Scaffold_2098	5912	6	1	2	0.333333	0	0	0	0	1	0.166667	3	0.5	0	0				4	1	0	8.33333	6216	3454	3984	10360
Scaffold_2136	5049	6	1	1	0.166667	0	0	0	0	2	0.333333	3	0.5	0	0				1	4	12	28.3333	3937	2014	2534	6561.67
Scaffold_2499	5686	6	1	1	0.166667	0	0	0	0	0	0	5	0.833333	0	0				0	5	6	18.3333	3750	1916	2458	6250
Scaffold_2824	5210	6	1	2	0.333333	0	0	0	0	0	0	4	0.666667	0	0				3	0	3	10	5171	2800	3342	8618.33
Scaffold_3151	5508	6	1	1	0.166667	0	0	0	0	1	0.166667	4	0.666667	0	0			3	1	8	1	16.6667	3260	1688	1971	5433.33
Scaffold_3154	5275	6	1	0	0	0	0	0	0	1	0.166667	5	0.833333	0	0	x		5	2	0	1	5	2247	1217	1509	3745
Scaffold_3160	5017	6	0.833333	0	0	0	0	0	0	1	0.166667	4	0.666667	1	0.166667	x		9	11	0	1	20	5326	2698	3462	8876.67
Scaffold_3162	5762	6	1	1	0.166667	0	0	0	0	2	0.333333	3	0.5	0	0	x		6	1	3	1	8.33333	4227	2162	2915	7045
Scaffold_1575	4808	5	1	2	0.4	0	0	0	0	0	0	3	0.6	0	0	x			1	2	1	8	3689	1873	2245	7378
Scaffold_1729	4117	5	1	4	0.8	1	0.2	0	0	0	0	0	0	0	0				0	0	1	2	1355	669	729	2710
Scaffold_1759	4962	5	1	0	0	0	0	0	0	2	0.4	3	0.6	0	0				2	2	1	10	4753	2190	2789	9506
Scaffold_1785	4084	5	1	0	0	0	0	0	0	1	0.2	4	0.8	0	0				1	2	2	10	7492	3806	4749	14984
Scaffold_1851	4048	5	1	3	0.6	0	0	0	0	0	0	2	0.4	0	0				0	3	6	18	6105	3010	3697	12210
Scaffold_1855	4082	5	0.8	0	0	0	0	0	0	0	0	4	0.8	1	0.2				2	0	3	10	3213	1630	1971	6426
Scaffold_1870	4311	5	1	0	0	0	0	0	0	0	0	5	1	0	0				0	1	6	14	3162	1573	2060	6324
Scaffold_1872	4116	5	1	1	0.2	0	0	0	0	0	0	4	0.8	0	0	x			1	7	0	16	1804	843	1014	3608
Scaffold_1882	4593	5	1	1	0.2	0	0	0	0	3	0.6	1	0.2	0	0				2	1	1	8	8340	4948	5751	16680
Scaffold_1889	4083	5	1	0	0	0	0	0	0	0	0	5	1	0	0	x			1	1	2	8	1237	660	846	2474
Scaffold_1903	4503	5	1	0	0	0	0	0	0	0	0	5	1	0	0	x	x		1	0	4	10	3893	1898	2300	7786
Scaffold_1914	4061	5	0.8	0	0	0	0	0	0	1	0.2	3	0.6	1	0.2				0	0	10	20	2296	1212	1478	4592
Scaffold_1918	4185	5	1	0	0	0	0	0	0	2	0.4	3	0.6	0	0	x			1	1	0	4	4054	1963	2482	8108
Scaffold_1925	4267	5	1	1	0.2	0	0	0	0	2	0.4	2	0.4	0	0				0	2	0	4	6084	3057	3697	12168
Scaffold_1929	4112	5	1	4	0.8	0	0	0	0	0	0	1	0.2	0	0				3	8	2	26	8672	4764	6072	17344
Scaffold_1936	4178	5	0.8	1	0.2	0	0	0	0	0	0	3	0.6	1	0.2				2	0	2	8	2057	1117	1300	4114
Scaffold_1961	4278	5	1	2	0.4	0	0	0	0	2	0.4	1	0.2	0	0				0	0	0	0	4417	2177	2691	8834
Scaffold_1970	4518	5	1	3	0.6	0	0	0	0	0	0	2	0.4	0	0				0	3	4	14	5388	2798	3430	10776
Scaffold_1978	4982	5	1	5	1	0	0	0	0	0	0	0	0	0	0				0	34	0	68	50189	64476	99966	100378
Scaffold_1979	4945	5	1	4	0.8	0	0	0	0	1	0.2	0	0	0	0				0	0	0	0	211	115	140	422
Scaffold_1980	4941	5	1	5	1	0	0	0	0	0	0	0	0	0	0				0	0	3	6	28519	36856	59439	57038
Scaffold_1981	4874	5	1	5	1	0	0	0	0	0	0	0	0	0	0				0	0	0	0	556	329	474	1112
Scaffold_1982	4905	5	1	1	0.2	0	0	0	0	2	0.4	2	0.4	0	0				0	0	0	0	0	0	0	0
Scaffold_1983	4781	5	1	4	0.8	0	0	0	0	1	0.2	0	0	0	0	x	x		0	0	0	0	10	6	13	20
Scaffold_1984	4775	5	1	5	1	0	0	0	0	0	0	0	0	0	0				1	0	0	2	20770	23807	34606	41540
Scaffold_1985	4728	5	1	3	0.6	0	0	0	0	1	0.2	1	0.2	0	0				0	0	0	0	1	0	0	2
Scaffold_1986	4711	5	1	4	0.8	0	0	0	0	0	0	1	0.2	0	0				0	0	0	0	8	1	4	16
Scaffold_1987	4694	5	1	5	1	0	0	0	0	0	0	0	0	0	0				0	0	0	0	888	678	556	1776
Scaffold_1988	4688	5	1	4	0.8	0	0	0	0	0	0	1	0.2	0	0				0	0	0	0	2	4	4	4
Scaffold_1989	4688	5	1	5	1	0	0	0	0	0	0	0	0	0	0				0	0	0	0	5	5	15	10
Scaffold_1990	4617	5	0.8	2	0.4	1	0.2	0	0	1	0.2	0	0	1	0.2				0	1	0	2	3510	2592	9757	7020
Scaffold_1991	4576	5	1	0	0	0	0	0	0	5	1	0	0	0	0				3	1	2	12	3761	1832	2046	7522
Scaffold_1992	4553	5	1	5	1	0	0	0	0	0	0	0	0	0	0				0	18	9	54	25436	31366	52158	50872
Scaffold_1993	4519	5	1	4	0.8	0	0	0	0	0	0	1	0.2	0	0				1	0	0	2	371	443	252	742
Scaffold_1994	4488	5	1	4	0.8	0	0	0	0	1	0.2	0	0	0	0				0	2	2	8	31	72	33	62
Scaffold_1995	4455	5	1	4	0.8	0	0	0	0	0	0	1	0.2	0	0				0	0	0	0	0	0	0	0
Scaffold_1996	4363	5	1	4	0.8	0	0	0	0	1	0.2	0	0	0	0				0	0	0	0	1349	1023	1529	2698
Scaffold_1997	4261	5	1	3	0.6	0	0	0	0	1	0.2	1	0.2	0	0				0	2	1	6	63	57	35	126
Scaffold_1998	4235	5	1	5	1	0	0	0	0	0	0	0	0	0	0				2	0	0	4	4817	3405	2747	9634
Scaffold_1999	4132	5	1	2	0.4	0	0	0	0	2	0.4	1	0.2	0	0				2	1	2	10	4555	2157	2522	9110
Scaffold_2000	4181	5	1	4	0.8	0	0	0	0	0	0	1	0.2	0	0	x	x		7	0	14	42	736	641	517	1472
[truncated: 1,168 more rows]
